# Supplementary material for: Public views on the donation and use of human biological samples in biomedical research: a mixed methods study
Source: PubMed Central journal article supplement — BMJ Open. 2013 Aug 7;3(8):e003056. doi: 10.1136/bmjopen-2013-003056 (PMC3740256; doi:10.1136/bmjopen-2013-003056), 2013-08-07
Supplement: bmjopen-2013-003056.draft_revisions.pdf [file bmjopen-2013-003056.draft_revisions.pdf]

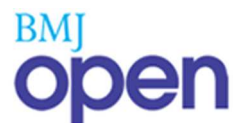

**Public views on the donation and use of human biological samples in biomedical research – a mixed methods study**

|                                    |                                                                                                                                                                                                                                                                                                                                                                                                                                                         |
|------------------------------------|---------------------------------------------------------------------------------------------------------------------------------------------------------------------------------------------------------------------------------------------------------------------------------------------------------------------------------------------------------------------------------------------------------------------------------------------------------|
| Journal:                           | <i>BMJ Open</i>                                                                                                                                                                                                                                                                                                                                                                                                                                         |
| Manuscript ID:                     | bmjopen-2013-003056                                                                                                                                                                                                                                                                                                                                                                                                                                     |
| Article Type:                      | Research                                                                                                                                                                                                                                                                                                                                                                                                                                                |
| Date Submitted by the Author:      | 15-Apr-2013                                                                                                                                                                                                                                                                                                                                                                                                                                             |
| Complete List of Authors:          | Lewis, Celine; Genetic Alliance UK, Unit 4D Leroy House<br>Clotworthy, Margaret; Human Focused Testing,<br>Hilton, Shona; Medical Research Council, CSO Social & Public Health<br>Sciences Unit<br>Magee, Caroline; National Cancer Research Institute, Confederation of<br>Cancer Biobanks<br>Robertson, Mark; AstraZeneca, Science Policy & Relations<br>Stubbins, Lesley; GlaxoSmithKline, Medicines Research Centre<br>Corfield, Jule; Areteva Ltd, |
| <b>Primary Subject<br>Heading</b>: | Public health                                                                                                                                                                                                                                                                                                                                                                                                                                           |
| Secondary Subject Heading:         | Genetics and genomics, Health policy                                                                                                                                                                                                                                                                                                                                                                                                                    |
| Keywords:                          | PUBLIC HEALTH, GENETICS, Health policy < HEALTH SERVICES<br>ADMINISTRATION & MANAGEMENT, PATHOLOGY                                                                                                                                                                                                                                                                                                                                                      |
|                                    |                                                                                                                                                                                                                                                                                                                                                                                                                                                         |

SCHOLARONE™  
Manuscripts

only

**Manuscript title:** Public views on the donation and use of human biological samples in biomedical research – a mixed methods study

Celine Lewis<sup>1</sup>, Margaret Clotworthy<sup>2</sup>, Shona Hilton<sup>3</sup>, Caroline Magee<sup>4</sup>, Mark J Robertson<sup>5</sup>, Lesley J Stubbins<sup>6</sup>, Julie Corfield<sup>7</sup>

<sup>1</sup>Genetic Alliance UK, Unit 4D Leroy House, 436 Essex Road, London, N1 3LY, UK

<sup>2</sup>Human Focused Testing, 50 the Barns, Littleport, Cambridge, CB6 1GG, UK

<sup>3</sup>Medical Research Council/CSO Social & Public Health Sciences Unit, 4 Lilybank Gardens, Glasgow, G12 8RZ, UK

<sup>4</sup>Confederation of Cancer Biobanks, National Cancer Research Institute, Angel Building, 407 St John Street, London EC1V 4AD, UK

<sup>5</sup>AstraZeneca, Science Policy & Relations, 11G43 Mereside, Alderley Park, Macclesfield, Cheshire SK10 4TF, UK

<sup>6</sup>GlaxoSmithKline Medicines Research Centre, Gunnels Wood Road, Stevenage, Hertfordshire, SG1 2NY, UK

<sup>7</sup>Areteva Ltd, BioCity, Nottingham, NG1 1GF, UK

**Running title:** Views on donating and use of biosamples – the UK public's preferences

**Keywords:** biobanking, public willingness, public views, public preferences, biomedical research

**Correspondence to:**

Dr Celine Lewis

Genetic Alliance UK,

Unit 4D Leroy House,

436 Essex Road,

London,

N1 3QP

**Email:** celine@geneticalliance.org.uk

**Word count:** 4937

**ABSTRACT**

**Objective:** A mixed methods study exploring the UK general public's willingness to donate human biosamples (HBS) for biomedical research.

**Setting:** Cross-sectional focus groups followed by an online survey.

**Participants:** Twelve focus groups (81 participants) selectively sampled to reflect a range of demographic groups; 1110 survey responders recruited through a stratified sampling method with quotas set on sex, age, geographical location, socio-economic group and ethnicity.

**Main outcome measures:** 1) identify participants' willingness to donate HBS for biomedical research; 2) explore acceptability towards donating different types of HBS in various settings; and 3) explore preferences regarding use and access to HBS.

**Results:** 87% of survey participants thought donation of HBS was important; 75% wanted to be asked to donate in general. Responders who self-reported having some or good knowledge of the medical research process were significantly more likely to want to donate ( $p < 0.001$ ). Reasons why focus group participants saw donation as important included: it was a good way of reciprocating for medical treatment received; it was an important way of developing drugs and treatments; residual tissue would otherwise go to waste; they or family members might benefit. The most controversial types of HBS to donate included: brain post mortem (29% would donate); eyes post mortem (35%); embryos (44%); spare eggs (48%) and sperm (58%). Concerning use of samples, there were concerns over animal research (34%), research conducted outside the UK (35%), and research conducted by pharmaceutical companies (56%), although education and discussion were found to alleviate such concerns during focus group discussions.

**Conclusions:** There is a high level of public support and willingness to donate HBS for biomedical research. Underlying concerns exist regarding the use of certain types of HBS and conditions under which they are used. Improved education and more controlled forms of consent for sensitive samples may mitigate such concerns.

## ARTICLE SUMMARY

### Article focus

- To explore the UK public's willingness to donate: residual biosamples following a medical procedure; biosamples donated as 'healthy volunteers'; additional biosamples during surgery; and biosamples post-mortem for medical research;
- The acceptability towards donating different types of biosamples in various settings;
- Preferences regarding use and access to biosamples.

### Key messages

- There is a high level of public support for biomedical research and willingness to donate samples for this purpose.
- Those responders who self-reported having some or good knowledge of the medical research process were significantly more likely to want to be asked to donate, supporting the need for public education to improve understanding of the research process and the contribution HBS make to this.
- Concerns exist regarding the use of certain types of samples, the conditions under which they are used and data security; greater transparency and discussion of the safeguards that exist in research is likely to alleviate some of these concerns.

### Strengths and limitations of this study

- This study contributes further to our understanding of the UK public's views regarding the types of human biological samples acceptable do donate, under what circumstances and for what research purposes. This study highlights the importance of involving the public in more transparent dialogue about the use of biosamples to encourage greater public involvement and support for this area.
- This study presented participants with a series of hypothetical questions about willingness to donate biosamples for medical research. Therefore the findings may not necessarily correlate with actual behaviour.

## INTRODUCTION

A gradual shift in the approach to biomedical research has accelerated use of human biological samples (HBS) and the establishment of biobanks with associated skills and infrastructure ('biobanking') to acquire, preserve and distribute this increasingly valuable resource. Biobanks are important custodians of HBS collections, usually with access to the donors' phenotypic and clinical data[1]. Samples can comprise human materials of all kinds, including organs, tissues, biofluids such as blood, and genetic materials, such as DNA. They may be obtained from a variety of donated sources: from healthy volunteers or as residual tissue surplus to diagnostic requirements following a medical procedure, or alternatively retrieved post-mortem. Sample collections may be population-based or disease-specific, originating from a wide range of people with differing demographics, health, behaviours and lifestyles. Moreover, they may be used by a variety of research organisations, including public and private enterprises.

Public willingness to donate HBS is essential to ensure the continued provision of samples for research[2]; hence numerous studies have been conducted to examine this issue[3-7]. These studies have shown that the public is generally positive towards research using donated HBS[4-6] and the majority is in principle willing to donate[3,7]. Less well known are the public's views regarding the types of HBS acceptable to donate, under what circumstances and for what research purposes. These issues are important to address to provide an insight into the key drivers motivating or preventing people from donating. Knowledge of these can also help inform biobanking governance and ensure consent procedures and patient information addresses any concerns which the public may have. This is important to help the public understand the need for, and the use of, HBS in biomedical research as well as to increase transparency and engender trust with the public. This study was conducted to broaden our understanding in these areas. Moreover, the findings are intended to inform a biobanking policy for STRATUM (Strategic Tissue Repository Alliance Through Unified Methods), a UK Government Technology Strategy Board and Industry-funded project seeking to address the problem that there are insufficient numbers of HBS and associated clinical data of adequate quality to fully support biomedical research in the UK. This research will also help inform the design of new consent templates and deliver guidance and strategies around the consent process for biobanks and researchers.

The aims of this study were to 1) identify participants' willingness to donate HBS for biomedical research; 2) explore acceptability towards donating different types of HBS in various settings; and 3) explore preferences regarding use and access to HBS. Public

1  
2  
3 views and preferences regarding consent procedures were also investigated and are  
4 described elsewhere.  
5

## 6 7 **METHODS**

8  
9 This was a mixed methods study comprising qualitative focus groups and a quantitative  
10 on-line survey. Ethical approval for the study was granted by the University of  
11 Manchester Research Ethics Committee in April 2012. A more detailed presentation of  
12 the methods can be found in a second paper related to this study (Consent for the use of  
13 human biological samples for biomedical research – a mixed methods study exploring  
14 the UK public's preferences, 2013, unpublished manuscript).  
15  
16

### 17 18 **Focus groups**

19  
20 Twelve focus groups (including one pilot group) were conducted between May and July  
21 2012 in six different geographic locations across the UK. Participants were recruited  
22 face-to-face in the street by the market research company The Focus Group. Participants  
23 were purposively sampled; each group chosen to reflect a particular demographic (age,  
24 socio-economic group (SEG), ethnicity, 'patients' who were affected by a condition or  
25 had had an operation in the past two years) in order to gather a wide spectrum of views  
26 and enable comparisons across groups. Prior to the day, participants were given an  
27 information sheet about the use of biosamples in research (Appendix I). Focus groups  
28 were held in 'neutral' locations such as hotel conference rooms or church halls, facilitated  
29 by an experienced facilitator (CL) and digitally recorded.  
30  
31

32  
33 The topic guide explored participants' views on: willingness to donate and acceptability  
34 of donating different types of HBS; in what circumstances; for what purposes; and to  
35 whom (supplementary files: Appendix II). Recordings were transcribed and the software  
36 package NVivo version 9 (QSR International, Pty Ltd) used to facilitate data analysis.  
37 This comprised grouping responses to questions into broad thematic categories which  
38 were then refined through sub-codes. Coding was conducted by CL and verified by a  
39 second researcher to ensure inter-rater reliability. Any discrepancies were discussed  
40 between the two researchers until consensus was reached.  
41  
42

### 43 44 **Survey**

45  
46 The findings from the focus groups were used to inform development of a quantitative  
47 survey used to canvas public opinion on the issues of interest across a representative  
48 sample of the UK population (supplementary files: Appendix III). The survey was carried  
49 out by the market research company Research Now using their online panel community  
50 of UK residents. A stratified sampling method was used: quotas were set on sex, age,  
51  
52  
53  
54  
55  
56  
57  
58  
59  
60

geographical location, SEG and ethnicity, in line with data provided by the Office of National Statistics (ONS) to ensure the sample was as representative of the UK population as possible. Within each category, a random sample was selected from the Research Now database containing 451,185 active respondents. We aimed to recruit 1,000 responders in total. In order to reduce any on-line bias in our sample, 100 face-to-face interviews with non-internet users were conducted. An additional 'boost' sample of 100 people (not included in the main sample analysis) was also conducted with people from three minority ethnic groups ('Black', 'Chinese', 'S. Asian') so that we could conduct sub-group analysis between the groups. The main survey was then conducted in September 2012.

## RESULTS

### Study population

Participant characteristics are detailed in Table 1.

Table 1: Participant characteristics

| Characteristic              | Focus group<br>N=81 | Survey<br>N=1110 |
|-----------------------------|---------------------|------------------|
| <b>Gender</b>               |                     |                  |
| Male                        | 33; 41%             | 504; 45%         |
| Female                      | 48; 59%             | 606; 55%         |
| <b>Age</b>                  |                     |                  |
| 18-24                       | 13; 16%             | 135; 12%         |
| 25-34                       | 18; 22%             | 184; 17%         |
| 35-44                       | 19; 23%             | 198; 18%         |
| 45-54                       | 10; 12%             | 184; 17%         |
| 55-64                       | 16; 20%             | 176; 16%         |
| 65+                         | 5; 6%               | 233; 21%         |
| <b>Socio-economic group</b> |                     |                  |
| A                           | 9; 11%              | 41; 4%           |
| B                           | 22; 27%             | 215; 19%         |
| C1                          | 24; 30%             | 311; 28%         |
| C2                          | 14; 17%             | 233; 21%         |
| D                           | 6; 7%               | 145; 13%         |
| E                           | 6; 7%               | 165; 15%         |
| <b>Region</b>               |                     |                  |
| East of England             | 7; 7%               | 92; 8%           |
| East Midlands               | -                   | 57; 5%           |
| London                      | 18; 22%             | 213; 19%         |
| North East                  | -                   | 40; 4%           |
| North West                  | -                   | 121; 11%         |
| Northern Ireland            | -                   | 30; 3%           |
| Scotland                    | 14; 17%             | 76; 7%           |
| South East                  | 14; 17%             | 165; 15%         |
| South West                  | -                   | 81; 7%           |
| Wales                       | -                   | 51; 5%           |
| West Midlands               | 14; 17%             | 94; 8%           |

|                                                                                 |         |           |
|---------------------------------------------------------------------------------|---------|-----------|
| Yorkshire/Humberlands                                                           | 14; 17% | 90; 8%    |
| <b>Ethnicity</b>                                                                |         |           |
| White or White British                                                          | 54; 67% | 1057; 95% |
| Mixed race                                                                      | 1; 1%   | 7; 1%     |
| Asian or Asian British                                                          | 10; 12% | 18; 2%    |
| Black or Black British                                                          | 9; 11%  | 19; 2%    |
| Chinese or Chinese British                                                      | 7; 9%   | 2; 0%     |
| Other ethnic group                                                              | 0; 0%   | 4; 0%     |
| Prefer not to say                                                               | 0; 0%   | 3; 0%     |
| <b>Religion</b>                                                                 |         |           |
| Christianity                                                                    |         | 677; 61%  |
| Islam                                                                           |         | 13; 1%    |
| Hinduism                                                                        |         | 6; 1%     |
| Sikhism                                                                         |         | 0; 0%     |
| Judaism                                                                         |         | 6; 1%     |
| Buddhism                                                                        |         | 11; 1%    |
| Other religion                                                                  |         | 15; 1%    |
| No religion                                                                     |         | 370; 33%  |
| Prefer not to say                                                               |         | 12; 1%    |
| <b>Religiosity</b>                                                              |         |           |
| Not at all religious                                                            |         | 234; 32%  |
| Moderately religious                                                            |         | 422; 58%  |
| Very religious                                                                  |         | 64; 9%    |
| Prefer not to say                                                               |         | 8; 1%     |
| <b>Education</b>                                                                |         |           |
| No formal qualification                                                         | 15; 19% | 70; 6%    |
| GCSE, O level, Scottish Standard Grade or equivalent                            | 19; 23% | 264; 24%  |
| GCE, A-level, Scottish Higher or similar                                        | 17; 21% | 214; 19%  |
| Vocational (BTEC/NVQ/Diploma)                                                   | -       | 230; 21%  |
| Degree level or above                                                           | 30; 37% | 317; 29%  |
| Prefer not to say                                                               | -       | 15; 1%    |
| <b>Self reported knowledge of medical research process</b>                      |         |           |
| No knowledge                                                                    |         | 463; 42%  |
| Some knowledge                                                                  |         | 603; 54%  |
| Good knowledge                                                                  |         | 44; 4%    |
| <b>Have you been affected by a disability or illness?</b>                       |         |           |
| Yes                                                                             |         | 399; 36%  |
| No                                                                              |         | 711; 64%  |
| <b>Has a close family member been affected by a disability or illness?</b>      |         |           |
| Yes                                                                             |         | 767; 69%  |
| No                                                                              |         | 343; 31%  |
| <b>Have you had blood or tissue removed during a medical procedure?</b>         |         |           |
| Yes                                                                             |         | 446; 40%  |
| No                                                                              |         | 553; 50%  |
| Don't know                                                                      |         | 111; 10%  |
| <b>Have you ever been asked to donate blood or tissue for medical research?</b> |         |           |
| Yes                                                                             |         | 182; 16%  |
| No                                                                              |         | 904; 81%  |
| Don't know                                                                      |         | 24; 2%    |



| If so, did you agree to donate? |  |          |
|---------------------------------|--|----------|
| Yes                             |  | 155; 85% |
| No                              |  | 23; 13%  |
| Don't know                      |  | 4; 2%    |

### Focus groups

One hundred and eighty-two members of the public who were approached were eligible and 81 people agreed to participate (45% response rate; 48 women, 33 men).

### Survey

Four thousand six hundred and seven people were invited to take part in the survey; 2014 did not respond, 860 began completing the survey but did not finish, 102 did not qualify to continue, 521 qualified for the survey but the quota was full and 1110 completed the questionnaire (28% response rate excluding those who did not qualify and where the quota was full). This response rate is comparable to similar studies on this topic[6]. Our quota sample was close to but not exactly matching our set targets. For this reason we carried out both weighted and unweighted analyses. There was no difference in the conclusions we reached by either method. In this paper we present the unweighted results (weighted results can be found at supplementary files: Appendix IV).

### Interest in being asked to donate

We began by providing a brief description of the use of HBS in biomedical research and then asked survey participants whether, in general, they wanted to be asked to donate. Three quarters (75%) of survey participants wanted to be asked (29% definitely yes, 46% probably yes); 18% didn't want to (14% probably not and 4% definitely not); and 7% didn't know. When asked how important they thought it was to donate HBS for biomedical research, 87% said either extremely important (50%) or important (37%). Less than 1% of participants (n=5) thought it was not at all important.

Respondents who wanted to be asked to donate HBS were significantly more likely to be: either not religious or only moderately so (where they did have a religious affiliation) (79.7% vs. 59.7%,  $X^2=36.56(1)$ ,  $p=0.001$ ); from higher SEG groups (A-D vs. E)(83.8% vs. 62.2%,  $X^2=36.55(1)$   $p<0.001$ ); had tissue removed during a medical or surgical procedure (87.2% vs. 73.1%,  $X^2=27.13(1)$ ,  $p<0.001$ ); had some or good knowledge of the medical research process (84.4% vs. 75.1%,  $X^2=13.04(1)$ ,  $p<0.001$ ); were under 55 years (84% vs. 75.1%,  $X^2=11.56(1)$ ,  $p=0.001$ ); were 'White' (81.7% vs. 60.9%,  $X^2=10.9(1)$ ,  $p=0.001$ ); have no religious affiliation (86.4% vs. 77.9%,  $X^2=9.9(1)$   $p=0.002$ ); and had an education level of A level or equivalent or higher (83.4% vs. 76.1%,  $X^2=7.18(1)$ ,  $p=0.007$ ). Using the boost sample for ethnic minorities we found

that 'Black' participants were significantly less likely to want to be asked to donate than 'White' participants (53.3% vs. 81.7%,  $X^2=20.12(1)$ ,  $p<0.001$ ). Participants who had a close family member affected by a condition were more willing to be asked to donate than those who hadn't, although the difference was not quite statistically significant (70.7% vs. 63.3%,  $X^2=3.8(1)$ ,  $p=0.051$ ).

Four independent variables were found to have a significant impact on participants' interest in being asked to donate tissue as shown in the logistic regression model in Table 2. The strongest predictor for wanting to be asked to donate was being from a higher socio-economic group (A-D vs. E) (OR=3.52, 95% CI 2.19-5.66,  $p<0.001$ ) followed by having had tissue removed during a medical or surgical procedure (OR=2.51, 95% CI 1.65-3.84,  $p=0.001$ ), being either not at all or only moderately religious (OR=2.42, 95% CI 1.31-4.47,  $p=0.005$ ), and having self-reported some or good knowledge of the medical research process (OR=2.01, 95% CI 1.33-3.03,  $p=0.001$ ).

Table 2. Multiple logistic regression examining participant willingness to donate tissue

| Participant characteristic            | Coefficient | 95% CI     | Odds ratio | p value |
|---------------------------------------|-------------|------------|------------|---------|
| Socio-economic group                  | 1.26        | 2.19, 5.66 | 3.52       | <0.001  |
| Religiosity                           | 0.89        | 1.31, 4.47 | 2.42       | 0.005   |
| Knowledge of medical research process | 0.70        | 1.33, 3.03 | 2.01       | 0.001   |
| Had tissue removed                    | 0.99        | 1.65, 3.84 | 2.51       | <0.001  |

Demographic items were excluded from this table if they were not statistically significant. All variables were entered into the models as categorical variables.  
CI: Confidence Interval.

Focus group participants also showed a strong willingness to donate HBS for biomedical research. Four key reasons were provide by participants. First, it was a good way of reciprocating for medical treatment received in the past, second, it was viewed as an "important way of developing drugs and treatments", and third, that residual tissue, which participants did not have any strong emotional ties to, would otherwise go to waste. The fourth reason offered was one of personal benefit whereby participants themselves or a family member was affected by an illness or disease.

*"Someone in my family has got Alzheimer's so I'm particularly supportive"* (Female, 18-24 focus group)

A minority of focus group participants did raise concerns. These included surgeons taking "liberties or advantage of the fact that you're out cold", concerns about data privacy and mistrust of profit-making companies using donated HBS or the government regulating their use.

"The world's very corrupt, and if something needs to get pushed through, it gets pushed through." Female, 'Black' focus group

Whilst interest in donating appeared to be high, it was evident that knowledge of the medical research process was low. In the survey only 4% of respondents self-reported to have a 'good knowledge' of the research process; 54% said they had 'some knowledge' and 42% said they had 'no knowledge'. Similarly, a number of focus group participants commented that the information leaflet was the first time they had heard anything about the use of donated HBS in medical research.

## Types of HBS

### Residual HBS

The majority of survey participants were either definitely or probably willing to donate residual blood (92%); cancerous tissue (90%); fat (89%); skin tissue (88%); bone or cartilage (84%); and liver tissue (84%) following a medical procedure (Figure 1). Less than half of participants were willing to donate spare eggs (women only) (48%) or spare embryos (44%) left over following in vitro fertilisation (IVF).

Figure 1: Would you donate the following types of samples for medical research if they were left over (after any necessary medical tests had been done) following a medical procedure?

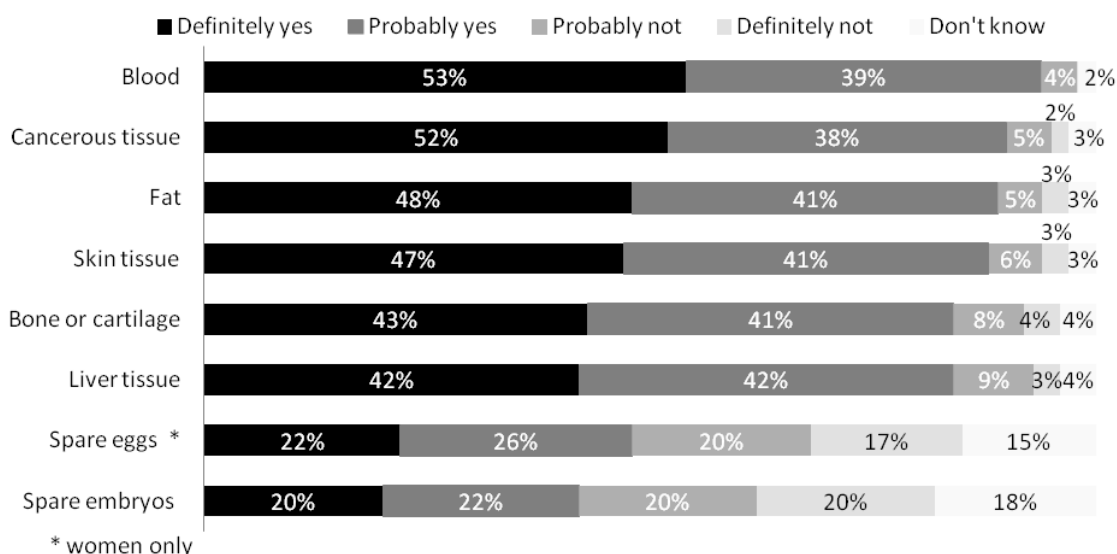

Note: percentages may not add up to 100% due to rounding.

Chi-square was conducted to examine effects of participant characteristics on willingness to donate spare eggs and spare embryos as these two tissue types caused most divide amongst participants. Willingness to donating spare embryos was significantly associated with being: male (55.9% vs. 48.3%,  $X^2=4.87(1)$ ,  $p=0.023$ ); under 55 years (55.1% vs. 45.3%,  $X^2=7.55(1)$ ,  $p=0.005$ ); from a higher (A-D) socio-economic group (54.9% vs. 32%,  $X^2=22.05(1)$ ,  $p<0.001$ ); White ethnicity (53% vs. 27.7%,  $X^2=10.48(1)$ ,  $p=0.001$ ), having a religious affiliation (63.5% vs. 45.9%,  $X^2=24.13(1)$ ,  $p<0.001$ ), being not at all or moderately religious where they did have a religious affiliation (48.1% vs. 25.5%,  $X^2=9.38(1)$ ,  $p=0.002$ ); and had had tissue removed during a medical procedure (56.9% vs. 46%,  $X^2=9.41(1)$ ,  $p=0.002$ ). Women who were willing to donate spare eggs

1  
2  
3 were significantly more likely to be: from a higher socio-economic group (A-D) (58.5% vs. 44.7%,  $X^2=4.45(1)$ ,  
4  $p=0.035$ ); White ethnicity (58.1% vs. 17.4%,  $X^2=13.21(1)$ ,  $p<0.001$ ); have no religious affiliation (71.5% vs.  
5 50.4%,  $X^2=18.47(1)$ ,  $p<0.001$ ); be not at all or moderately religious where they did have a religious affiliation  
6 (53.5% vs. 23.7%,  $X^2=10.88(1)$ ,  $p=0.001$ ); and had had tissue removed during a medical procedure (62.8%  
7 vs. 50.4%,  $X^2=6.77(1)$ ,  $p=0.009$ ).  
8

9 These results confirm our focus group findings, where most people were willing to  
10 donate residual tissue but donation of reproductive tissue raised concerns for a  
11 significant number of participants. A key concern was that reproductive tissue would be  
12 used for reproductive purposes without the knowledge of the donor.  
13  
14

15  
16 *"Although they said it's [ethical approval process] very strict, I still in the back of my*  
17 *mind have a thing where someone could take my egg and have my child"* Female, had  
18 operation in past two years  
19

20  
21 A further concern related to whether it was 'right' from an ethical or religious  
22 perspective, to be conducting research on reproductive tissue.  
23

24  
25 *"I would be really worried...an embryo is a baby. I know it's still very, very early days,*  
26 *but you're playing God."* Female – patient affected by a condition  
27

28 Those people who were willing to donate reproductive tissue underscored the benefits  
29 that could results from such research.  
30

31  
32 *"You have to remove yourself from the situation and imagine yourself as an infertile*  
33 *person and maybe someone that could benefit immensely from that research."* Female –  
34 18-24 focus group  
35  
36

37 Some did, however, highlight the importance of being informed as to how reproductive  
38 tissue would be used because of its sensitive nature.  
39

#### 40 **'Healthy' volunteers**

  
41

42  
43 Survey participants were then presented with a scenario in which they were asked to  
44 imagine that they are in a hospital waiting room awaiting an appointment and are asked  
45 whether they would donate certain types of HBS specifically for the purposes of medical  
46 research (Figure 2). Most responders were either definitely or probably willing to donate  
47 urine (89%), saliva (89%) and blood (81%), however, fewer people would donate tissue  
48 taken during a local anaesthetic (67%) or sperm (men only) (58%).  
49  
50  
51  
52  
53  
54  
55  
56  
57  
58  
59  
60

Would you agree to donate the following types of samples specifically for medical research, i.e. not as part of any medical procedure, but purely for the purposes of research?

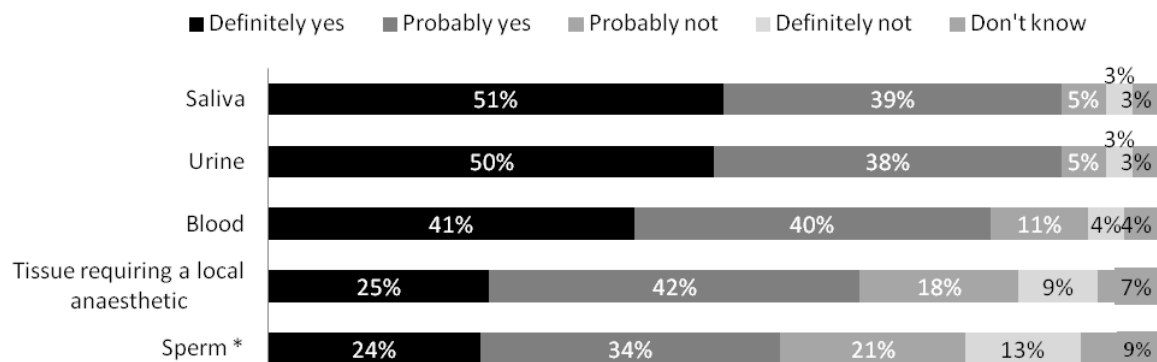

Note: percentages may not add up to 100% due to rounding.

Chi-square was conducted to examine effects of participant characteristics on willingness to donate tissue requiring a local anaesthetic and sperm as these two tissue types caused most divide amongst participants. Willingness to donate tissue requiring a local anaesthetic was significantly associated with: being over 25 years (72.9% vs. 59.3%,  $X^2=9(1)$ ,  $p=0.003$ ); from a higher socio-economic group (A-D) (73.1% vs. 60.9%,  $X^2=9.03(1)$ ;  $p=0.003$ ), White ethnicity (72.3% vs. 48.9%,  $X^2=10.87(1)$ ,  $p=0.001$ ); being not at all or moderately religious where they had a religious affiliation (71.4% vs. 49.2%,  $X^2= 11.53(1)$ ,  $p=0.001$ ); having good knowledge of the medical research process (75.8% vs. 64.5%,  $X^2=14.96(1)$ ,  $p=0.001$ ), had had tissue removed during a medical procedure (77.9% vs. 64%,  $X^2=20.77(1)$ ,  $p<0.001$ ), and had agreed to donate left over tissue (82.8% vs. 45.5%,  $X^2=13.51(1)$ ,  $p<0.001$ ). Men who were willing to donate sperm were significantly more likely to be: from a higher socio-economic group (A-D) (66.8% vs. 42%,  $X^2=14.47(1)$ ,  $p<0.001$ ); White ethnicity (65.8% vs. 22.2%,  $X^2=18.95(1)$ ,  $p<0.001$ ), and be either not at all or moderately religious where they did have a religious affiliation (64.3% vs. 36.4%,  $X^2=5.61(1)$ ,  $p=0.018$ ).

Focus group participants were also generally positive towards donating HBS specifically for research purposes, although some commented that they would not want to undergo an invasive procedure.

*"Depends on what they wanted, if it's not invasive or nothing then I'd say yes."* Female – 'Black' focus group

A number said they would be more likely to donate HBS if they did not have to travel somewhere specifically to do so. Focus group participants also appeared to want more information about how their sample would be used if they were donating HBS as 'healthy' volunteers.

*"I'd want to know the purpose behind it but if I'm helping something then why not?"* Male – 'Chinese' focus group

### **Additional HBS during surgery**

Finally, survey participants were presented with a scenario in which they are having surgery which requires a general anaesthetic, and asked whether they would be willing

1  
2  
3 to have additional tissue taken not required to be removed for therapeutic benefit. Over  
4 three quarters of responders (78%) were willing to donate HBS taken from the same  
5 part of the body being operated on, 63% were willing to donate HBS taken from an area  
6 close by, and 44% would donate HBS involving an additional procedure e.g. taking bone  
7 marrow whilst under the same general anaesthetic.  
8  
9

10  
11 This scenario was not explored explicitly with focus group participants, but was included  
12 in the survey as a number had aired concerns about surgeons taking additional tissue  
13 during surgery without consent.  
14

15  
16 *"I would be worried about giving consent before they performed an operation in case the*  
17 *main task of the operation is to remove cancer...and they take some tissue for research.*  
18 *I think it would be OK but only if they asked."* Male, 18-24 group  
19  
20

### 21 **Donation of HBS in the event of one's death**

22  
23 We explored whether the public were willing to donate tissue and whole organs in the  
24 event of their death. First, we compared survey responders' views concerning the  
25 donation of tissue taken from an organ compared to donating a whole organ using the  
26 liver and brain as examples. We found that tissue type had a greater impact on people's  
27 willingness to donate than amount of tissue: 89% of people were willing to donate liver  
28 tissue; 68% a whole liver; 66% brain tissue; 53% a whole brain. On presenting  
29 participants with a list of organs and asking them whether there were any whole organs  
30 they would not consider donating for medical research in the event of their death, 71%  
31 would not donate their brain, 65% would not donate their eyes, 27% would not donate  
32 their heart, 14% would not donate their liver; 14% would not donate their lungs and  
33 13% would not donate their kidneys. Five people (0.5%) said they would not donate  
34 reproductive tissue in the free text box. Seventeen percent would not donate any organs  
35 for medical research.  
36  
37  
38  
39  
40  
41  
42  
43  
44  
45

46 Donating whole organs for medical research in the event of one's death caused unease  
47 for a number of focus group participants. Some had concerns about the impact on family  
48 members, citing that it was a "sensitive subject" that may make them feel  
49 "uncomfortable". A woman in the South Asian group cited religious reasons for not  
50 wanting to donate organs. Others didn't like the idea of their body being "chopped up  
51 like on a butcher's board" and preferred "to remain whole" and "untouched". A few  
52 participants erroneously believed that their organs would not be useful to researchers  
53 because they were old or unhealthy. When focusing on particular organs, eyes were  
54  
55  
56  
57  
58  
59  
60

found to be most contentious and made participants feel “funny” or “squeamish”. They also had concerns that eyes were “identifiable”.

When asked whether they would be willing to donate whole organs not suitable for transplant for research purposes instead, 68% of survey responders said they would, 11% would prefer they were not used at all if they couldn’t be used for transplant, 9% would not agree to donate an organ for transplant and 12% didn’t know.

### Uses of HBS

The most controversial types of research were research involving HBS in combination with animals (only 34% of survey participants would donate for this purpose), research conducted outside the UK (35%), and research involving ‘cells from embryos’ (41%) (Figure 3). Research into understanding how our body fights disease was the least controversial (85%).

Figure 3: Would you be willing to donate samples for the following type of samples for research?

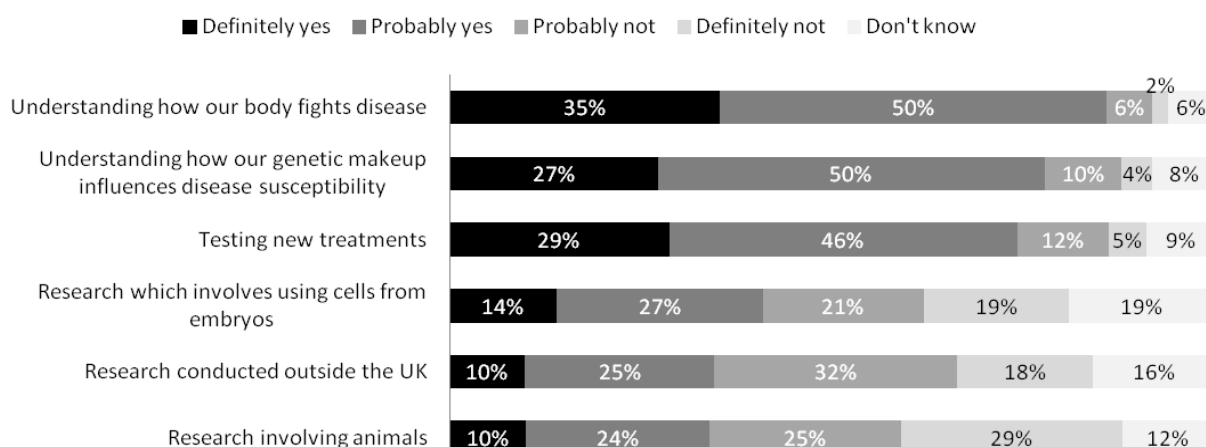

Note: percentages may not add up to 100% due to rounding. Chi-square was conducted to examine effects of participant characteristics on willingness to donate samples for research outside the UK and research involving animals as these two research types had least support. Those participants who were less willing to donate samples for research outside the UK were significantly more likely to be: over 55 years (67.8% vs. 53.8% ,  $X^2=17.2(1)$ ,  $P=0.001$ ); from a low socio-economic group (E) (72.8% vs. 56.6%,  $X^2=11.92(1)$ ,  $p=0.001$ ); non-white ethnicity (78% vs. 58%,  $X^2=5.7(1)$ ,  $p=0.017$ ); have a religious affiliation (63.4% vs. 49.8%,  $X^2=14.83(1)$ ,  $p=0.001$ ); have a lower education level (GCSE or equivalent or lower) (65.9% vs. 55.5%,  $X^2=8.18(1)$ ,  $p=0.004$ ); and had not had tissue removed during a medical procedure (62.5% vs. 55%,  $X^2=4.57(1)$ ,  $p=0.033$ ). Those participants who were less willing to donate samples for research involving animals were significantly more likely to be: female (69.5% vs. 51.8%,  $X^2=30.74(1)$ ,  $p<0.001$ ); from a low socio-economic group (E) (78% vs. 58.4%,  $X^2=19.9(1)$ ,  $p<0.001$ ); non-white ethnicity (80% vs. 60.5%,  $X^2=6.09(1)$ ,  $p=0.014$ ); have a religious affiliation (63.6% vs. 56.7%,  $X^2=4.02(1)$ ,  $p=0.045$ ); be very religious whereby they did have a religious affiliation (78.7% vs. 61.9%,  $X^2=5.99(1)$ ,  $p=0.014$ ); have no knowledge of the medical research process (67.6% vs. 57.1%,  $X^2=10.4(1)$ ;  $p=0.001$ ) and had not agreed to donate leftover tissue for medical research (81% vs. 49.3%,  $X^2=6.12(1)$ ,  $p=0.013$ ).

Research involving animals was cited as a cause for concern by a number of focus group participants, particularly if the research caused the animals "excessive pain". Others had concerns about the way animals were cared for in research settings. Nevertheless, a view held by a significant number of people was that research and drugs tested on animals was "not a nice thought...but in the long run the best option" and that "the information gained from watching [an animal used in research] might help thousands of people".

Research conducted outside the UK was a concern for some focus group participants because other countries might not have similarly strict governance arrangements as those that exist in the UK, or because HBS might be sold. Other types of research cited as being controversial included cloning, stem cell research, genetic engineering and "designer babies".

### Access to HBS

Most survey responders were willing to donate HBS to NHS hospitals (84%), medical research charities (79%), universities (68%), diagnostic companies (63%) and pharmaceutical companies (56%) (Figure 4).

Figure 4: Would you be willing to donate samples to the following organisations to carry out approved research?

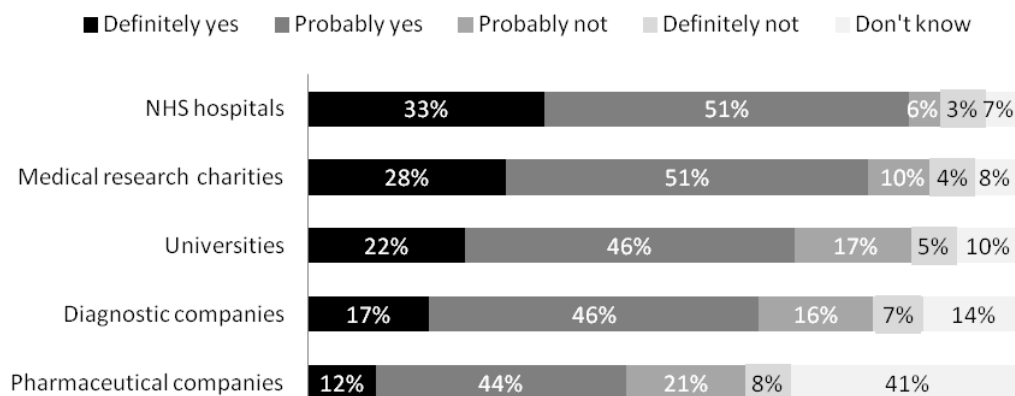

Note: percentages may not add up to 100% due to rounding.

Chi-square was conducted to examine effects of participant characteristics on willingness to donate samples for pharmaceutical companies as this organisation had the least support. Those participants who were less willing to donate samples to pharmaceutical companies were significantly more likely to be: over 55 years (39.4% vs. 31.3%,  $X^2=6.16(1)$ ,  $p=0.013$ ); from a low socio-economic group (E) (43.4% vs. 32.6%,  $X^2=5.91(1)$ ;  $p=0.015$ ), non-white ethnicity (60.9% vs. 32.9%,  $X^2=14(1)$ ,  $p=0.001$ ); live in London (45.1% vs. 31.7%,  $X^2=11.02(1)$ ,  $p=0.001$ ); have a religious affiliation (38.1% vs. 26.9%(1),  $X^2=11.1(1)$ ,  $p=0.001$ ); be very religious whereby they had a religious affiliation (54.5% vs. 36.7%,  $X^2=6(1)$ ,  $p=0.014$ ); have no knowledge of the medical research process (38.3% vs. 31.6%,  $X^2=4.14(1)$ ,  $p=0.042$ ); and had not had tissue removed during a medical procedure (38% vs. 29.8%,  $X^2=6(1)$ ,  $p=0.014$ ).



1  
2  
3 Focus group discussions highlighted that there was generally a high level of faith in the  
4 benefits of science, and trust towards the NHS, charities and universities, who were seen  
5 as contributing positively towards society. The role of ethics review boards and legal  
6 systems in providing oversight and control of medical research was considered  
7 important, nevertheless, it was acknowledged that most people are unaware of these  
8 safeguards.  
9

10  
11  
12 *"I do now know something about the process, and like the ethics side and presenting to*  
13 *a board, but before I wouldn't have known anything about the research process. So I*  
14 *guess I'm just thinking, how would I feel if I didn't know about those procedures?"*  
15

16 Female – pilot group  
17

18  
19 Some initial negativity was found in relation to pharmaceutical companies conducting  
20 research because of their commercial, profit-making nature and concerns that they  
21 "exploit patients". However, such concerns were often addressed by other members of  
22 the group who acknowledged that commercialisation of research was "a fact of life" and  
23 that pharmaceutical companies "need to make money to keep their research going".  
24  
25

### 26 **Medical records and lifestyle information**

27

28  
29 We asked participants whether they would be willing to have medical records and  
30 lifestyle information linked but de-identified (so that the sample is anonymous to the  
31 researcher but contains codes that would allow others to identify an individual from it) to  
32 their biosample. Sixty eight percent of survey responders would, 22% would not and  
33 10% didn't know. Survey responders were more willing to have their de-identified  
34 lifestyle information linked to their biosample; 82% would, 12% would not, and 6%  
35 didn't know.  
36  
37

38  
39 Concerns about linking medical records with HBS were raised by focus group  
40 participants. Data protection and privacy were two key concerns, for example,  
41 participants were worried that their personal data might be "hacked or mislaid". Others  
42 cited concerns about data being accessed by the police or insurance companies. Some  
43 participants felt uncomfortable about sensitive medical details such as sexual diseases or  
44 illegal drug use being seen by people unconnected with their health. Nevertheless, most  
45 participants understood the importance of linking medical records and lifestyle  
46 information to HBS as long as they were not identifiable.  
47  
48

49  
50 *"You want the sample to be as useful as possible so you want to give them the most*  
51 *complete picture. You want to give them all the information that is available."* Male – had  
52 operation in past two years.  
53  
54  
55  
56  
57  
58  
59  
60

## DISCUSSION

Results from this study are consistent with the findings from other empirical research that there is a high level of public support for biomedical research and willingness to donate HBS for this purpose[3-5,7-10]. However, by presenting participants with scenarios consisting of a variety of HBS types across a number of settings, and by using both qualitative and quantitative methods, we have been able to build a richer understanding of public attitudes. Whilst it is important to bear in mind that the opinions expressed are hypothetical and therefore do not necessarily correspond with how people would actually behave in practice, they still offer an intriguing insight into public attitudes which can help inform policy and practice.

The general willingness of the UK public to donate residual HBS is consistent with findings from other studies conducted in the UK, USA and Scandinavia where willingness to donate varied from 67%-88%[3-5,7-9]. Interestingly, people who themselves had had tissue removed were significantly more likely to want to be asked to donate than those that hadn't (87% compared to 73%). A number of other studies conducted in the UK and elsewhere have found patient willingness to be high, between 83%-99%[11-16]. This is likely to be because donation of surplus tissue provides patients with an opportunity to reciprocate or demonstrate gratitude towards those involved in the therapeutic process[13] or because they have had the medical need explained to them and can relate to the experience more closely. Those responders who self-reported having some or good knowledge of the medical research process were also significantly more likely to want to be asked to donate. This finding supports the need for public education to improve understanding of the research process and the contribution HBS make to this. Another striking finding was the apparent discrepancy between people who saw biosample donation as important (87%) and those who wanted to be asked to donate (75%). It may be that although people see donation as important, other concerns e.g. around issues such as data privacy, or other ethical considerations such as commercial use of HBS may prevent some people from donating; concerns have been identified in this and other empirical studies[5,11,17,18].

Lower levels of support for HBS donation were identified amongst minority ethnic groups, a finding that has been seen elsewhere, particularly amongst African-Americans[10,19-21] and Asian-American women[22]. A study conducted in China also found that public and patient willingness to donate residual tissue was low compared to studies conducted in the UK, Scandinavia and the USA, at only 65%[23]. These differences may stem from different cultural attitudes towards donation, religious beliefs or low levels of trust in public institutions (which may stem from previous breaches of

1  
2  
3 trust as highlighted by Ma et al.[23] amongst the 'Chinese' population). Mistrust of  
4 profit-making companies and the government were identified during focus group  
5 discussions with ethnic minority groups in this study, although not exclusively so.  
6 Information about the role of ethics review boards in safeguarding participants' interests  
7 is therefore vital for ensuring public trust.  
8  
9

10  
11 A large proportion of people were unwilling to donate reproductive tissue. This type of  
12 HBS donation raised a number of unique moral, ethical and social concerns, as  
13 exemplified by focus group discussions. Interestingly, the survey showed that men were  
14 more likely to donate semen than women were excess eggs following an IVF procedure  
15 (58% v 48%), which may indicate egg donation is a more contentious issue or that  
16 women feel a greater attachment to eggs than men to sperm[24]. Another possible  
17 reason may be the limited number of eggs that a woman has, and the greater effort and  
18 risk required to make them available *ex vivo*, resulting in a more judicious approach to  
19 their use; for example, women may prefer to keep excess eggs following IVF for future  
20 uses rather than donate them for research. More controlled forms of consent (tiered or  
21 specific) may be one way of alleviating concerns people may have about donating  
22 sensitive HBS.  
23  
24  
25  
26  
27  
28

29  
30 When asked to consider post-mortem donation, eyes and brains were considered the  
31 least desirable organs to donate for research purposes, a finding that has been reported  
32 elsewhere[7]. As the donation of eyes is crucial for vision research and drug testing, and  
33 with donated brains being essential for research into conditions such as multiple  
34 sclerosis, Alzheimer's and Parkinson's disease, different ways of raising awareness and  
35 motivating donation need to be considered. For example, completely transparent  
36 discussion with families on the day prior to forensic post-mortem examination,  
37 conducted in a sensitive manner, has led to research authorisation and donation in a  
38 very high proportion of cases to the Sudden Death Brain and Tissue Bank in  
39 Edinburgh[25]. It may also be worth considering incentives to donation for research, as  
40 have already been discussed in depth elsewhere, although with a greater emphasis on  
41 donation for transplant[26]. Our research highlights that a significant number of people  
42 (68%) would be willing to donate whole organs not suitable for transplant for research  
43 purposes instead. Such soft incentives are likely to be welcomed by families, a finding  
44 which has also been reported by Womack et al.[27] where over 70% of family members  
45 consented for the retrieval of blood and tissue at the time of post-mortem examination.  
46  
47  
48  
49  
50  
51  
52

53  
54 The finding that 67% of people were willing to undergo a local anaesthetic to donate  
55 tissue seems unusually high at first glance. Nevertheless, such a finding should not be  
56 dismissed; women have been known to undergo local aesthetic to donate healthy breast  
57  
58  
59  
60

1  
2  
3 tissue for breast cancer research, as evidenced by the 2800 women who have donated to  
4 the Komen Tissue Bank in the United States[28]. The finding that a significant proportion  
5 of the public are willing to donate as 'healthy volunteers' also supports the premise that  
6 there is a strong altruistic desire to contribute to medical research and a high level of  
7 trust in and support for the research process[29].  
8  
9

10  
11 Research involving animals and research conducted outside the UK were the least  
12 supported research types in this study. Animal research remains a controversial topic  
13 and much empirical and ethical debate has focused on this issue[30-32]. However, the  
14 finding that a large proportion of the public do not want their HBS used for research  
15 outside the UK is intriguing. Our qualitative data show that concerns exist around  
16 regulation and commodification of HBS, findings supported elsewhere in the  
17 literature[33,34]. To address these concerns, potential donors should be provided with  
18 information related to the specific issues that relate to those countries where HBS are  
19 likely to be sent.  
20  
21  
22  
23  
24

25 Regarding access to donated HBS, overall findings indicate high levels of trust towards  
26 research organisations conducting biomedical research. Lowest trust was afforded to  
27 pharmaceutical companies, primarily because of their profit-making nature, a finding  
28 which concurs with other studies[5,35,36]. Greater transparency and education of the  
29 public by the research community about the role pharmaceutical companies play in  
30 research and drug development (as is currently being conducted through initiatives such  
31 as EUPATI; [www.patientsacademy.eu](http://www.patientsacademy.eu)), will help to highlight the collaborations that  
32 frequently exist between private and public enterprises. Emphasising the safeguards that  
33 exist in research through regulation and ethics review boards is also likely to alleviate  
34 some of these concerns.  
35  
36  
37  
38  
39

40 Finally, our research reinforces the concerns held by the public regarding the linking of  
41 de-identified clinical data to HBS[11,18]. Discussion during the consent procedure  
42 around the value of associated clinical data, and the safeguards in place to ensure data  
43 security, may go some way to reducing these worries. Similarly, the strict governance  
44 arrangements around access to personal information by third parties including the police,  
45 insurance companies and employers should be made clear.  
46  
47  
48  
49

### 50 **Strengths and Limitations**

51  
52 As with any qualitative research, the findings from this study rely on the researcher's  
53 interpretation of comments made by focus group participants. Nevertheless, we have  
54 used a methodology grounded in the data and ensured inter-rater reliability through  
55 cross-checking coding to ensure the interpretation was as close to the intended meaning  
56  
57  
58  
59  
60

1  
2  
3 as possible. Moreover, we have been able to verify focus group findings though the  
4 results from the survey. A major limitation of this study is its hypothetical nature; hence  
5 the results need to be interpreted with caution. Nevertheless, where possible, we  
6 presented questions as scenarios to try and make them as 'real' as possible. A further  
7 limitation is that the dropout rate was relatively high; participants that did complete the  
8 survey may have done so because of a strong attachment to the issues raised and this  
9 may have skewed the results. However, every effort was made to ensure that the results  
10 were as representative of the UK population as possible. Finally, the focus groups and  
11 survey were conducted in English which excluded those people who were not competent  
12 English speakers and/or readers. Our findings are therefore not necessarily  
13 representative of the non-English speaking community living in the UK.  
14  
15  
16  
17  
18  
19  
20  
21

## 22 **CONCLUSION**

23  
24 There is a high level of public support for, and willingness to contribute to biobanking  
25 and the research process. In particular, people appear keen to contribute to research  
26 above and beyond the donation of residual tissue. Nevertheless, underlying concerns  
27 exist regarding the use of certain types of HBS, the conditions under which they are  
28 used and data security. Improved public education in these areas, for example, through  
29 the development of a 'Frequently Asked Questions' document which includes information  
30 on the ethics infrastructure that exists in the UK may mitigate some of these concerns.  
31 More controlled forms of consent for sensitive types of HBS and donation incentives may  
32 also positively impact public willingness to donate. These suggestions should be  
33 considered by the research community and policy makers.  
34  
35  
36  
37  
38  
39  
40  
41

42 **Acknowledgements** We would like to thank Lisa Bennett, Sarah Dickson, Catherine  
43 Elliott, James Ironside and Chris Womack and for their helpful comments on this paper;  
44 Sarah Dickson, Jim Elliott and Neil Formstone for their contribution to the design of the  
45 study; and Samantha Reeve and Zheng Lei for help with data analysis.  
46  
47  
48

49 **Funding statement** This work was supported by a grant from the Technology Strategy  
50 Board through the Stratified Medicines Competition grant number 101021, direct  
51 financial contributions by AstraZeneca and resource in kind by AstraZeneca,  
52 GlaxoSmithKline and Lab 21.  
53  
54

55 **Competing interests:** Lesley Stubbins is an employee of GlaxoSmithKline. Mark  
56 Robertson is an employee of AstraZeneca.  
57  
58  
59  
60

1  
2  
3 **Contributors:** J.C. conceived the study. All authors contributed to the study design. In  
4 addition to all the authors, Sarah Dickson, Jim Elliott and the late Neil Formstone also  
5 contributed towards the design of the study and development of the focus group and  
6 survey questions. C.L. facilitated the focus groups. Focus group recruitment was  
7 conducted by the company The Focus Group; the survey was conducted through the  
8 market research company Research Now. C.L. conducted data analysis and  
9 interpretation with the help of Samantha Reeve and Zheng Lei. The initial draft of the  
10 manuscript was prepared by C.L and then circulated repeatedly among the authors for  
11 critical revision. All authors approved the final manuscript.  
12  
13  
14  
15

16  
17 **Ethical approval** This study was approved by the Ethics Review Board of the University  
18 of Manchester, reference 11459.  
19

20  
21 **Data sharing statement** Transcripts from the focus groups and full results of the  
22 survey are available from CL at [celine@geneticalliance.org.uk](mailto:celine@geneticalliance.org.uk). Supplementary material is  
23 also available at [www.geneticalliance.org.uk/projects/stratum\\_docs.htm](http://www.geneticalliance.org.uk/projects/stratum_docs.htm)  
24  
25

## 26 27 **REFERENCES**

- 28  
29  
30 1. Kaiser J. Biobanks. Population databases boom, from Iceland to the U.S. *Science*  
31 2002;**298**:1158-61.  
32
- 33  
34 2. Tutton R, Kaye J, Hoeyer K. Governing UK Biobank: the importance of ensuring public  
35 trust. *Trends in biotechnology* 2004;**22**:284-5.  
36
- 37  
38 3. Kaufman D, Bollinger J, Dvoskin R, et al. Preferences for opt-in and opt-out  
39 enrollment and consent models in biobank research: a national survey of  
40 Veterans Administration patients. *Genetics in medicine : official journal of the*  
41 *American College of Medical Genetics* 2012;**14**:787-94.  
42
- 43  
44 4. Kettis-Lindblad Å, Ring L, Viberth E, et al. Genetic research and donation of tissue  
45 samples to biobanks. What do potential sample donors in the Swedish general  
46 public think? *The European Journal of Public Health* 2006;**16**:433-40.  
47
- 48  
49 5. Tupasela A, Sihvo S, Snell K, et al. Attitudes towards biomedical use of tissue sample  
50 collections, consent, and biobanks among Finns. *Scandinavian Journal of Public*  
51 *Health* 2010;**38**:46-52.  
52  
53  
54  
55  
56  
57  
58  
59  
60

- 1  
2  
3 6. Simon CM, L'Heureux J, Murray JC, et al. Active choice but not too active: Public  
4 perspectives on biobank consent models. *Genetics in Medicine* 2011;**13**:821-31.  
5
- 6  
7 7. Goodson ML, Vernon BG. A study of public opinion on the use of tissue samples from  
8 living subjects for clinical research. *Journal of clinical pathology* 2004;**57**:135-38.  
9
- 10  
11 8. Kaufman DJ, Murphy-Bollinger J, Scott J, et al. Public Opinion about the Importance of  
12 Privacy in Biobank Research. *The American Journal of Human Genetics*  
13 2009;**85**:643-54.  
14
- 15  
16 9. Ipsos MORI Social Research Institute. Human Tissue Authority General Public Survey.  
17 2010 [http://www.hta.gov.uk/ db/ documents/2007-09-](http://www.hta.gov.uk/db/documents/2007-09-10_Ipsos_MORI_general_public_qual_and_quant_report_final_200709101952.pdf)  
18  
19 [10 Ipsos MORI general public qual and quant report final 200709101952.pdf](http://www.hta.gov.uk/db/documents/2007-09-10_Ipsos_MORI_general_public_qual_and_quant_report_final_200709101952.pdf)  
20  
21 Accessed 26 February 2013.  
22
- 23  
24 10. Chen DT, Rosenstein DL, Muthappan P, et al. Research with stored biological  
25 samples: what do research participants want? *Arch Intern Med* 2005;**165**:652-5.  
26
- 27  
28 11. Jack AL, Womack C. Why surgical patients do not donate tissue for commercial  
29 research: review of records. *BMJ* 2003;**327**:262.  
30
- 31  
32 12. Bryant RJ, Harrison RF, Start RD, et al. Ownership and uses of human tissue: what  
33 are the opinions of surgical in-patients? *Journal of clinical pathology*  
34 2008;**61**:322-26.  
35
- 36  
37 13. Start RD, Brown W, Bryant RJ, et al. Ownership and uses of human tissue: Does the  
38 Nuffield bioethics report accord with opinion of surgical inpatients? *BMJ*  
39 1996;**313**:1366-68.  
40
- 41  
42 14. Wheeler J, Agarwal M, Sugden J, et al. Experiences from the front-line routine  
43 consenting of surplus surgically removed tissue: without investment by the  
44 National Health Service fully informed consent for all is not available. *J Clin Pathol*  
45 2007;**60**:351-4.  
46  
47
- 48  
49 15. Vermeulen E, Schmidt MK, Aaronson NK, et al. A trial of consent procedures for  
50 future research with clinically derived biological samples. *British journal of cancer*  
51 2009;**101**:1505-12.  
52  
53  
54  
55  
56  
57  
58  
59  
60

- 1  
2  
3 16. Hamajima N, Tajima K, Oya H, et al. Patients' views on residual blood use for  
4  
5 research purposes. Japanese journal of cancer research : Gann 1998;**89**:341-5.  
6
- 7 17. Haddow G, Bruce A, Sathanandam S, et al. 'Nothing is really safe': a focus group  
8  
9 study on the processes of anonymizing and sharing of health data for research  
10  
11 purposes. Journal of evaluation in clinical practice 2010;**17**:1140-6.  
12
- 13 18. Hoeyer K, Olofsson BO, Mjorndal T, et al. Informed consent and biobanks: a  
14  
15 population-based study of attitudes towards tissue donation for genetic research.  
16  
17 Scand J Public Health 2004;**32**:224-9.  
18
- 19 19. Wang SS, Fridinger F, Sheedy KM, et al. Public attitudes regarding the donation and  
20  
21 storage of blood specimens for genetic research. Community genetics 2001;**4**:18-  
22  
23 26.  
24
- 25 20. Moorman PG, Skinner CS, Evans JP, et al. Racial differences in enrolment in a cancer  
26  
27 genetics registry. Cancer epidemiology, biomarkers & prevention : a publication  
28  
29 of the American Association for Cancer Research, cosponsored by the American  
30  
31 Society of Preventive Oncology 2004;**13**:1349-54.  
32
- 33 21. McQuillan GM, Porter KS, Agelli M, et al. Consent for genetic research in a general  
34  
35 population: the NHANES experience. Genetics in medicine : official journal of the  
36  
37 American College of Medical Genetics 2003;**5**:35-42.  
38
- 39 22. Lee CI, Bassett LW, Leng M, et al. Patients' willingness to participate in a breast  
40  
41 cancer biobank at screening mammogram. Breast cancer research and treatment  
42  
43 2012;**136**:899-906.  
44
- 45 23. Ma Y, Dai H, Wang L, et al. Consent for use of clinical leftover biosample: a survey  
46  
47 among Chinese patients and the general public. PloS one 2012;**7**:e36050.  
48
- 49 24. Kirkman M. Egg and embryo donation and the meaning of motherhood. Women &  
50  
51 health 2003;**38**:1-18.  
52
- 53 25. Millar T, Walker R, Arango JC, et al. Tissue and organ donation for research in  
54  
55 forensic pathology: the MRC Sudden Death Brain and Tissue Bank. The Journal of  
56  
57 pathology 2007;**213**:369-75.  
58  
59  
60



- 1  
2  
3 26. Nuffield Council on Bioethics. Human bodies: donations for medicine and research.  
4  
5 2011 [http://www.nuffieldbioethics.org/sites/default/files/Donation\\_full\\_report.pdf](http://www.nuffieldbioethics.org/sites/default/files/Donation_full_report.pdf)  
6  
7 Accessed 26 February 2013.  
8  
9 27. Womack C, Jack AL. Family attitudes to research using samples taken at coroner's  
10  
11 postmortem examinations: review of records. *BMJ* 2003;**327**:781-2.  
12  
13 28. [http://blog.cookcountygov.com/2012/09/12/stroger-hospital-of-cook-county-hosts-](http://blog.cookcountygov.com/2012/09/12/stroger-hospital-of-cook-county-hosts-komen-cure-tissue-bank-event-september-29th/)  
14  
15 [komen-cure-tissue-bank-event-september-29th/](http://blog.cookcountygov.com/2012/09/12/stroger-hospital-of-cook-county-hosts-komen-cure-tissue-bank-event-september-29th/). Accessed 27 February 2013.  
16  
17 29. Morrell B, Lipworth W, Axler R, et al. Cancer as Rubbish: Donation of Tumor Tissue  
18  
19 for Research. *Qualitative health research* 2011;**21**:75-84.  
20  
21 30. Jones DA. What does the British public think about human-animal hybrid embryos? *J*  
22  
23 *Med Ethics* 2009;**35**:168-70.  
24  
25 31. Hobson-West P. The role of 'public opinion' in the UK animal research debate. *J Med*  
26  
27 *Ethics* 2010;**36**:46-9.  
28  
29 32. Ringach DL. The use of nonhuman animals in biomedical research. *The American*  
30  
31 *journal of the medical sciences* 2011;**342**:305-13.  
32  
33 33. Abou-Zeid A, Silverman H, Shehata M, et al. Collection, storage and use of blood  
34  
35 samples for future research: views of Egyptian patients expressed in a cross-  
36  
37 sectional survey. *Journal of medical ethics* 2010;**36**:539-47.  
38  
39 34. Capron AM, Mauron A, Elger BS, et al. Ethical norms and the international  
40  
41 governance of genetic databases and biobanks: Findings from an international  
42  
43 study. *Kennedy Institute of Ethics journal* 2009;**19**:101-24.  
44  
45 35. Haddow G, Cunningham-Burley S, Bruce A, et al. Generation Scotland: consulting  
46  
47 publics and specialists at an early stage in a genetic database's development.  
48  
49 *Critical Public Health* 2008;**18**:139-49.  
50  
51 36. Budimir D, Polasek O, Marusic A, et al. Ethical aspects of human biobanks: a  
52  
53 systematic review. *Croat Med J* 2011;**52**:262-79.  
54  
55  
56  
57  
58  
59  
60

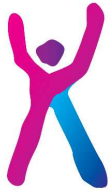

**Genetic Alliance UK**  
Supporting. Campaigning. Uniting.

## Appendix I

# Donating biological samples for medical research

### Introduction

Medical research is necessary to improve our understanding of what keeps us healthy and how diseases start and progress. It also means scientists can develop new and improved treatments.

Body fluid (such as blood, saliva, urine) and human tissue (such as fat, cancer tumours or muscle) are often used in scientific and medical research. Types of research that need body fluid and human tissue include:

- Looking at how the body works to fight disease.
- Testing new treatments for conditions such as heart disease and diabetes.
- Developing tests for different types of cancer.
- Researching how certain types of cells could be used to treat conditions like Parkinson's disease, Alzheimer's disease and multiple sclerosis.

Many of the tests and treatments used today resulted from people donating body fluid and human tissue (often called 'samples') for research years ago.

### How are human samples collected?

There are a number of ways that human samples can be collected:

- Samples may be left over after surgery. Tissue may be removed during surgery so tests can be done on the tissue or to stop the diseased tissue spreading to other parts of the body. After any necessary tests have been done on the tissue, there may be some left over. This left over tissue may be destroyed or used for medical research.
- Samples may be left over from a medical test such as a blood test.
- Samples might be donated specifically for medical research.
- A person may give permission (known as 'consent' or 'authorisation') for a sample to be taken and used for research in the event of their death.
- A person's family may give permission for the person's organs, which would have been donated for transplant, to be used for research if they are not suitable for transplant or a suitable recipient is not available.

The collection and use of samples is tightly governed by law in the UK. The removal of samples from a person is always done with the donor's permission, and any research first has to be approved by a research ethics committee. This committee is usually made up of doctors, scientist, patients and the general public, and ensures any research allowed to be done is for the benefit of patients. In specific circumstances the law allows samples that have already been collected to be used for another purpose, as long as the donor cannot be identified and the use has been approved by an ethics committee.

### What is done with the sample once it is collected?

Samples may be collected by a researcher and used immediately, or they may be collected for research purposes and kept. This may be in a researcher's laboratory or it may be in a storage place specifically for samples, known as a biobank.

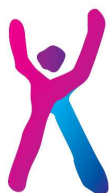

## Genetic Alliance UK

Supporting. Campaigning. Uniting.

The biobank keeps the samples so they can be used by scientists for research. In other words, biobanks are a little like libraries of samples, and only a research team can use them if they have the appropriate approval. A biobank has to follow regulations and have a licence, granted by the Human Tissue Authority (a UK Government organisation), to be able to store human tissue samples for research.

These systems ensure that any research respects the privacy of the people who donated the samples and that the research is of benefit to society. In many cases, it can be very important to have a patient's medical records along with their sample so that scientists can make sense of the results of their research. Any identifying information, such as names or addresses, is removed and not included with the sample.

### **How long is the biological sample kept?**

A sample may be used all at once. However, it is often the case that it won't all be used in one go. Therefore the sample may be stored and used over many years so that research can be done on it well into the future.

### **What are the benefits from donating biological samples to medical research?**

The person donating the sample is unlikely to benefit directly from the research, as it can take many years for the research on samples to produce new treatments or cures for diseases. Nevertheless, donors often see a benefit from knowing that they have personally helped medical research.

## **Genetic Alliance UK 2012**

### **The following information was used during the making of this leaflet:**

"Donating samples for research; Patient information" – Central England Haemato-Oncology Research Biobank

"Donating your tissue for research"- Human Tissue Authority

"Active choice but not too active: Public perspectives on biobank consent models" Simon et al. 2011; Genetics in Medicine

## Appendix II

## Focus Group – Discussion Guide

**Introduction (5 minutes)**

*Thank them for coming*

*Aim of discussion – hear people’s views, there are no right or wrong opinions, disagreement OK*

*Participation voluntary*

*Confidentiality – all info anonymous, personal details will not be passed on to any third party*

*Get permission for recording to be taped – no names or identifying features used when typed up*

*Guidelines – talk one at a time; am interested in everyone’s views so will try and give everyone equal ‘airtime’; no wrong answers – be honest and open.*

*Turn mobile phones off*

*Go round room. Ask everyone to say their name and one of their favourite foods.*

**Research (30 minutes)**

On the information sheet you’ve been given, there is some general information about donating samples for research. Has everybody had a chance to read this information? (if not give participants a few minutes to read document). So, to summarise....*give a brief overview of information on the document.*

1. So to start off, does anyone have any questions about anything I’ve said so far?

So I’d like us to think now about the different types of samples someone might donate to medical research. Human biological samples can mean a variety of different things including body fluid such as blood, saliva and sperm, and human tissue such as fat, cancer tumours or muscle or even whole organs.

2. Do you think there are some types of samples which are more sensitive to give than others? Which ones? Why?

There are also various different ways that samples can be collected. They might be

- left over from routine procedures such as surgery;
- left over after a medical test such as a blood test;
- donated specifically for medical research, for example a cheek swab or an extra blood sample;
- donated after a person’s death;
- a person’s organs e.g. heart or kidneys, which would have been donated for transplant, may be used for research if they are not suitable for transplant or a suitable recipient is not available. The relevant clinical data may also be included and reviewed after death.

3. I’d like us to go through each of these in turn and discuss whether you have concerns about any of these ways that samples might be collected and why. GO THROUGH AND PROBE EACH POINT SPECIFICALLY (AFTER GROUP DISCUSSION: ask participants to complete associated question on questionnaire)

4. Do you see donation of human samples for medical research and organ donation for transplant similarly or do you think they are different?

5. Thinking specifically about donating tissue or organs after one’s death, do you think if someone has indicated in writing that they are willing to donate these for research in the event of their death, their wishes can be overridden by their relatives?

1  
2  
3 Samples may be used for a variety of different types of research. This might include looking  
4 at how the body works to fight disease; testing new treatments for conditions such as heart  
5 disease and diabetes or developing ways of diagnosing earlier different types of cancer.  
6

- 7 6. Are there any types of research you would not be happy for your sample to be used  
8 for? Why?

9 (AFTER GROUP DISCUSSION: ask participants to complete associated question on  
10 questionnaire)  
11

12 There are many places where research is performed, such as universities, NHS, charities  
13 such as cancer research, government labs and pharmaceutical companies. These are all  
14 groups that do research & sometimes they collaborate with each other in order to make  
15 medical progress.  
16

- 17  
18 7. Do you have any concerns about any particular types of organisations using donated  
19 samples. Which if any, and why?

20  
21 (AFTER GROUP DISCUSSION: ask participants to complete associated question on  
22 questionnaire)  
23

- 24 8. What do you think about the organisations that conduct research on samples? Do  
25 you think they are generally doing a good thing for society? Do you have any  
26 concerns about what they do?  
27

- 28 9. Institutions such as the government and ethics review committees make decisions  
29 about what research can and can't be done on human samples. Ethics review  
30 committees are usually made up of different experts such as of doctors, scientists,  
31 ethics experts and patients Do you generally trust these types of institutions to make  
32 decisions about what research can and can't be done using human tissue samples?  
33  
34

### 35 **Consent (40 minutes)**

36  
37 I'd like to now talk about getting permission, also known as consent, to use a person's  
38 sample for medical research. Most of us have probably had blood taken at some point and  
39 some of us will have had an operation. If we have blood taken for a test, there might be  
40 some blood left over after the test has been done. Similarly, tissue may be removed during  
41 an operation and there may be some left over after any necessary tests have been done on  
42 the tissue. So you would not have any additional tissue taken just for research purposes  
43 unless you had specifically given permission for this at the time it was going to be taken. In  
44 most cases, it is just the leftover blood or tissue that you might agree to donate to medical  
45 research.  
46  
47

- 48 10. Thinking about leftover blood or tissue being used for medical research, do you think  
49 a person needs to be asked for their consent? FOR EACH RESPONSE: Why/why not?  
50 How important is this to you?  
51

- 52 11. What would you expect to happen to samples that are left over from clinical  
53 procedures?  
54

- 55 12. The majority of the time, tissue that is left over is destroyed. How do you feel about  
56 that?  
57

58 There are a number of different ways that a person could give their permission or consent  
59 for their sample to be used for medical research. I'd like us to think about some of these  
60 now and discuss what we like and what we dislike about these different types of consent.

For peer review only - <http://bmjopen.bmj.com/site/about/guidelines.xhtml>

I'd like us to start by thinking about whether we prefer what is known as an **opt-in** system, or whether we prefer an **opt-out** system of sample donation.

Opt-in means that a person has to say that, after they turn 18, they are willing to and actively agree to donate their sample for research. This is how the current system for organ donation works in the UK.

The other approach is an opt-out approach. In this system, it is assumed that a person is happy, after they turn 18, for their sample to be used for research unless they specifically say otherwise. However, there is a mechanism in place for a person who is not willing to donate to opt out.

So, to start with, let's think about the first option, OPT-IN.

13. What do you think are the pros and cons about this approach? Why?

14. Thinking now about the OPT-OUT approach, what do you think are the pros and cons? Why?

15. Which do you prefer? How important is this to you? (AFTER GROUP DISCUSSION: ask participants to complete associated question on questionnaire)

The current system is an opt-in one, so I want us to think about this type of consent now. If you were going to be asked to donate any leftover blood or tissue for medical research there are two ways this could be done. You could be asked to give consent **every time** you have an operation or blood test, or you could give consent just **once for life for all your samples**, with the option of withdrawing at a later point if you wanted to.

16. Thinking about **consent every time**, what do you think are the advantages and disadvantages of this approach?

17. Thinking about **consent once for life**, what do you think are the advantages and disadvantages of this approach?

18. Can you think of any happy medium which might be better?

19. Which would you prefer? Why? How important is this to you? (AFTER GROUP DISCUSSION: ask participants to complete associated question on questionnaire)

20. If people gave consent just once, when and where do you think the best place would be to give consent?

21. If someone wanted to consent to donate their tissue or organs for medical research in the event of their death, do you think it should be obtained at the same time as consent for organ transplantation and recorded on the organ donor register?

In front of you, you have 3 different scenarios. In each one the story is essentially the same, however there are some slight differences and these are highlighted in bold. I'd like to discuss what you think of each of these in turn.

*Read all 3 scenarios out loud highlighting the key differences between the three. Then go back and discuss each one in turn.*

Scenario 1: Lisa is having surgery to remove a lump from her breast which the doctor is concerned may be cancerous. Before the surgery the surgeon explains that once the tissue is removed, they will take it to the laboratory to do tests on it to check what it is. The surgeon then explains that after these tests are done, there may be some tissue left over. He asks Lisa if she would like to donate this left over tissue for medical research. If it is not donated for medical research it will be destroyed. The surgeon doesn't know exactly what kinds of research the tissue might be used for, but it may be used to find better ways to diagnose, prevent and treat cancer. He also explains that before any research is done, it has to be approved by an independent ethics committee.

So, in this scenario:

- Lisa is asked to give consent once to donate the left over tissue for a range of future unknown uses
- Lisa is given some general information about the kind of research the tissue might be used for but nothing specific.
- This type of consent is known as GENERIC CONSENT

22. What do you think about this type of consent?

23. What do you **like** about this approach?

24. Do you have **any concerns** about this approach?

**Scenario 2:** Lisa is having surgery to remove a lump from her breast which the doctor is concerned may be cancerous. Before the surgery the surgeon explains that once the tissue is removed, they will take it to the laboratory to do tests on it to check what it is. The surgeon then explains that after these tests are done, there may be some tissue left over. He asks Lisa if she would like to donate this left over tissue for medical research. If it is not donated for medical research it will be destroyed. The surgeon doesn't know exactly what types of research the tissue might be used for, but it may be used to find better ways to diagnose, prevent and treat cancer. Lisa is asked to sign a consent form. The surgeon explains that **Lisa can indicate on the consent form whether there are any particular kinds of research which she doesn't want the tissue to be used for, for example research involving animals or research conducted outside the UK.** He also explains that before any research is done, it has to be approved by an independent ethics committee.

So, in this scenario:

- Lisa is asked to give consent once to donate the tissue for a range of future unknown uses;
- Lisa is given some general information about the kind of research the tissue might be used for;
- **Lisa can say if there are any particular kinds of research which she doesn't want the tissue to be used for.**
- This type of consent is known as TIERED CONSENT

25. What do you think about this type of consent?

26. What do you **like** about this approach?

27. Do you have any **concerns** about this approach?

Scenario 3: Lisa is having surgery to remove a lump from her breast which the doctor is concerned may be cancerous. Before the surgery the surgeon explains that once the tissue is removed, they will take it to the laboratory to do tests on it to check what it is. The surgeon then explains that after these tests are done, there may be some tissue left over. He asks Lisa if she would like to donate this left over tissue for medical research. If it is not

1  
2 donated for medical research it will be destroyed. The surgeon explains that **the hospital**  
3 **are currently involved in a study looking at the growth of tumours. He informs her**  
4 **that if she gives permission for the left over tissue to be used, it would only be for**  
5 **this particular study.** He also explains that the study has been approved by an  
6 independent ethics committee.  
7

8 So, in this scenario:

- 9
- 10 • **Lisa is only asked to give consent to a particular study and is given**  
11 **information about that study.**
  - 12 • This type of consent is known as SPECIFIC CONSENT

13 28. What do you think about this type of consent?

14 29. What do you **like** about this approach?

15 30. Do you have any **concerns** about this approach?

16  
17  
18  
19  
20  
21 31. In this exercise we have discussed three different types of consent. Which do you  
22 prefer and why? GO ROUND AND ASK PEOPLE (AFTER GROUP DISCUSSION: ask  
23 participants to complete associated question 6 & 7 on questionnaire)

24  
25 32. Generic consent is the most practical type of consent as it is the least costly to put in  
26 place. Researchers try their very best to honour donors' wishes, but in some cases  
27 where they cannot do this with confidence, instead of risking using a sample for  
28 something the donor feels strongly against, it won't be used at all. If your first choice  
29 wasn't generic consent, does this information change your preference? (AFTER  
30 GROUP DISCUSSION: ask participants to complete question 8.

31  
32 33. So, we've discussed which type of consent you would like for left over samples.  
33 Would your preference be any different for samples that you might donate  
34 specifically for research, e.g. if you volunteered to take part in a study and had to  
35 give a saliva or blood sample?

36  
37 34. Would your preference be any different if you were donating what you might  
38 consider to be more sensitive samples e.g. genetic data, stem cells?

39  
40 35. If you decide to withdraw consent would you be happy for researchers to use the  
41 data that had already been generated up to that point using your sample?

42  
43 36. Do you think a central website where you can find out about general research that  
44 your sample might be used for would be useful and something you would use?  
45  
46  
47

### 48 Information (10 minutes)

49  
50 Researchers often need to have access to the donor's medical records in order to be able to  
51 meaningfully interpret the results of the scientific research. However, information, such as  
52 names or addresses are always removed and not included with the sample. This is so that  
53 the person who donated the sample cannot be identified by the scientist conducting the  
54 research or anyone analysing the results of the research. However, the sample may have a  
55 code so that someone not involved in the research can identify the individual if necessary.  
56

57 37. Would you be happy with your medical records being linked to your sample or would  
58 you have concerns? Why?  
59  
60



1  
2 38. Are there any types of information you would not want to be associated with your  
3 sample?  
4

5 Sometimes it can also be helpful for the researcher to have certain information about the  
6 lifestyle of the person who donated the sample, for example whether they smoked, drank  
7 alcohol, how often they exercised etc. This information might help them to better  
8 understand the particular condition they are investigating.  
9

10 39. Would you be happy for this information to be made available or would you have  
11 concerns about your lifestyle information being associated with your sample? Why?  
12  
13

#### 14 **Ownership of sample (5 minutes)**

15  
16 40. What significance do you attach to a biological sample once it has been removed  
17 from your body? Do you still see it as yours or part of you in some way? Are you  
18 owed money if a drug is developed using your sample?  
19  
20  
21  
22  
23  
24  
25  
26  
27  
28  
29  
30  
31  
32  
33  
34  
35  
36  
37  
38  
39  
40  
41  
42  
43  
44  
45  
46  
47  
48  
49  
50  
51  
52  
53  
54  
55  
56  
57  
58  
59  
60

## Appendix V

Survey looking at the publics' views on donating biological samples for medical research

*This survey was originally conducted online in September 2012 and hosted by the market research company Research Now.*

Q1. What age are you?

1. 18-24
2. 25-34
3. 35-44
4. 45-54
5. 55-64
6. 65+

Q2. Are you male or female?

1. Male
2. Female

Q3. What is the occupation of person who receives the highest income in your household?

1. Higher managerial/ professional/ administrative (e.g. established doctor, solicitor, board director in a large organisation (200+ employees, top level civil servant/public service employee)) **(A – Letters will be hidden)**
2. Intermediate managerial/ professional/ administrative (e.g. newly qualified (under 3 years) doctor, solicitor, board director small organisation, middle manager in large organisation, principle officer in civil service/local government) **(B)**
3. Supervisory or clerical level/ junior managerial/ professional/ administrative (e.g. office worker, student doctor, foreman with 25+ employees, salesperson, etc) **(C1)**
4. Student **(C1)**
5. Skilled manual worker (e.g. skilled bricklayer, carpenter, plumber, painter, bus/ ambulance driver, HGV driver, AA patrolman, pub/bar worker, etc) **(C2)**
6. Semi or unskilled manual work (e.g. manual workers, all apprentices to be skilled trades, caretaker, park keeper, non-HGV driver, shop assistant) **(D)**
7. Casual worker – not in permanent employment **(E)**
8. Housewife/househusband/ homemaker **(E)**
9. Retired and living on state pension **(E)**
10. Unemployed or not working due to long-term sickness **(E)**
11. Full-time carer of other household member **(E)**
98. Other (specify)

Q4. What region do you live in?

1. Channel Islands
2. East of England
3. East Midlands
4. London
5. North East
6. North West
7. Northern Ireland
8. Scotland
9. South East
10. South West
11. Wales
12. West Midlands
13. Yorkshire / Humberside
96. Not on Map

Q5. Please choose one option that best describes your ethnic group or background.

1. White or White British
2. Mixed race
3. Asian or Asian British (not Chinese)
4. Black or Black British
5. Chinese
6. Other ethnic group
96. Prefer not to say

Q6. Which religion do you most identify with?

1. Christianity
2. Islam
3. Hinduism
4. Sikhism
5. Judaism
6. Buddhism
7. Other religion
8. No religion
96. Prefer not to say

Q7. If you do have a religion you identify with, to what extent do you consider yourself religious?

1. Not at all religious
2. Moderately religious
3. Very religious
96. Prefer not to say

1  
2  
3  
4 Q8. Please indicate which, if any, is the highest educational or professional qualification you  
5 have obtained.  
6

- 7  
8 1. No formal qualification  
9 2. GCSE, O level, Scottish Standard Grade or equivalent  
10 3. GCE, A-level, Scottish Higher or similar  
11 4. Vocational (BTEC/NVQ/Diploma)  
12 5. Degree level or above  
13 96. Prefer not to say  
14

15  
16  
17 Q9. How would you describe your own level of knowledge about the medical research process  
18 including the use of human tissue samples?  
19

- 20 1. No knowledge  
21 2. Some knowledge  
22 3. Good knowledge  
23  
24

25 Q10. Are you or have you ever been affected by a long-standing illness, disability or infirmity  
26 which has required continuous or frequent medical attention (e.g. cancer, diabetes, heart disease,  
27 asthma, a genetic condition)?  
28

- 29  
30 1. Yes  
31 2. No  
32  
33

34 Q11. Has a close family member ever been affected by a long-standing illness, disability or  
35 infirmity which has required continuous or frequent medical attention (e.g. cancer, diabetes, heart  
36 disease, asthma, a genetic condition)?  
37

- 38  
39 1. Yes  
40 2. No  
41  
42

43 Q12. Have you ever had blood or tissue removed during a medical or surgical procedure?  
44

- 45 1. Yes  
46 2. No  
47 97. Don't know  
48  
49

50 Q13. Have you ever been asked to donate any blood or tissue for medical research?  
51

- 52 1. Yes  
53 2. No  
54 97. Don't know  
55  
56

57 **ASK IF CODED 1 AT Q13.**  
58  
59  
60

1  
2  
3 Q14. Did you agree to donate?  
4

- 5 1. Yes  
6 2. No  
7  
8 97. Don't know  
9

10 **ASK IF CODED 2 AT Q14.**

11 Q14a. Please tell us a little bit about your reasons for choosing not to donate.

12 *There are no right or wrong answers – we're just interested in your honest opinion.*  
13

14  
15 This survey is being done to help us understand public opinion about human tissue samples donated  
16 by people for medical research.  
17

18  
19 Medical research is essential to improve our understanding of what keeps us healthy and how  
20 diseases start and progress. It also means scientists can develop new and improved treatments.  
21 Body fluid such as blood, saliva and urine, and human tissue such as cells, skin, fat or even whole  
22 organs (in the event of someone's death), are often used in scientific and medical research. Usually  
23 these are referred to as samples.  
24

25  
26 Types of research that need samples include:  
27

- 28  
29 • Looking at how the body works to fight disease.  
30 • Looking at why some people are more likely to develop certain diseases.  
31 • Developing tests to diagnose conditions like cancer or dementia earlier on.  
32 • Testing new treatments for conditions such as heart disease and diabetes.  
33 • Researching how certain types of cells could be used to treat conditions like Parkinson's  
34 disease and Alzheimer's disease.  
35  
36

37  
38 Many of the tests and treatments used today resulted from people donating samples for research  
39 previously. The removal of samples from a person is always done with the donor's permission.  
40 Samples that are donated for research are anonymised so that the researcher using the sample does  
41 not know who it came from. The types of research that are allowed to take place are highly  
42 regulated by both UK law and also by independent research ethics committees (usually made up of  
43 doctors, scientist, patients and the general public). These ensure any research allowed to be done is  
44 for the benefit of patients.  
45  
46

47  
48 *The next button will appear shortly. In the meantime take some time to read the information above  
49 as it relates to the remainder of the survey.*  
50

51 Q15. On a scale of 1 to 5 with 1 being Not At All Important and 5 being Extremely Important, how  
52 important do you think it is for people to donate samples for medical research?  
53

54  
55 **SCALE:**

- 56 1. Not at all important  
57 2.  
58  
59  
60

- 3.
- 4.
5. Extremely important
97. Don't know

Q16. Samples can be left over from surgery or a medical procedure, or they can be donated specifically for research. Left over samples that are not required for clinical diagnosis or donated for medical research are often destroyed.

In general, would you like to be asked to donate samples for medical research?

1. Definitely yes
2. Probably yes
3. Probably not
4. Definitely not
97. Don't know

#### RANDOMISE STATEMENTS

Q17. You are having a medical procedure to treat a health issue. Would you donate the following types of samples for medical research if they were left over (after necessary medical tests had been done) following the procedure?

#### SCALE:

1. Definitely yes
2. Probably yes
3. Probably not
4. Definitely not
97. Don't know

#### STATEMENTS:

1. Blood
2. Skin tissue
3. Fat
4. Cancerous tissue
5. Liver tissue
6. Bone or cartilage
7. Spare eggs not fertilised during IVF treatment (IVF is a process by which an egg is fertilised by a sperm outside the body and then transferred back into the body to establish a successful pregnancy) **ASK ONLY FEMALES**
8. Spare embryos (fertilised eggs) not transferred back into the body following IVF (IVF is a process by which an egg is fertilised by a sperm outside the body and then transferred back into the body to establish a successful pregnancy)

#### RANDOMISE STATEMENTS

1  
2  
3 Q18. You've gone to the hospital for an appointment and whilst you are in the waiting room the  
4 receptionist explains they are collecting samples for medical research. Would you agree to donate  
5 the following types of samples specifically for medical research, i.e. not as part of any medical  
6 procedure, put purely for the purposes of research?  
7

8  
9 Would you agree to donate the following types of samples specifically for medical research?  
10 Below are some definitions you might need to know in order to answer the questions.  
11

12  
13 *Local anaesthetic - "A type of painkilling medication that is used to numb areas of the body during*  
14 *surgical procedures. You stay awake when you have a local anaesthetic"*  
15

16  
17 *General anaesthetic - "A medication that causes loss of sensation. It is used to give pain relief during*  
18 *surgery. General anaesthetic makes you completely lose consciousness so that surgery can be carried*  
19 *out without causing any pain or discomfort. Most healthy people don't have any problems when*  
20 *having a general anaesthetic. However, as with most medical procedures, there is a small risk of*  
21 *long-term complications and, rarely, death."*  
22

23  
24 **SCALE:**

- 25 1. Definitely yes  
26 2. Probably yes  
27 3. Probably not  
28 4. Definitely not  
29 97. Don't know  
30  
31

32  
33  
34 **STATEMENTS:**

- 35 1. Saliva  
36 2. Urine  
37 3. Blood  
38 4. Tissue collected requiring a local anaesthetic (e.g. a skin cell scraping)  
39 5. Tissue collected requiring a general anaesthetic (e.g. a liver sample)  
40 6. Sperm **ASK ONLY MALES**  
41  
42  
43  
44

45 Q19. In the event of your death, would you be willing to donate the following for medical  
46 research?  
47

48 **SCALE:**

- 49 1. Definitely yes  
50 2. Probably yes  
51 3. Probably not  
52 4. Definitely not  
53 97. Don't know  
54  
55

56  
57 **STATEMENTS:**  
58  
59  
60

1. A small sample of the liver
2. A small sample of the brain
3. A whole liver
4. A whole brain

Q20. You are having surgery for a health issue which requires a general anaesthetic. The surgeon asks you whether you would be willing to consent to any additional tissue (i.e. tissue not needing to be removed as part of the health issue) being taken during the surgery for medical research. He assures you that any additional tissue taken would have no impact for you or your health and that no extra tissue would be removed without your consent.

A decision to consent or not to consent would be equally respected and would have no impact on the care you receive.

Would you be willing to donate the following types of samples for medical research?

*General anaesthetic - "A medication that causes loss of sensation. It is used to give pain relief during surgery. General anaesthetic makes you completely lose consciousness so that surgery can be carried out without causing any pain or discomfort. Most healthy people don't have any problems when having a general anaesthetic. However, as with most medical procedures, there is a small risk of long-term complications and, rarely, death."*

**SCALE:**

1. Definitely yes
2. Probably yes
3. Probably not
4. Definitely not
97. Don't know

**STATEMENTS:**

1. Samples taken from the same part of the body being operated on
2. Samples taken from an area close by
3. Samples involving an additional procedure e.g. taking bone marrow or a tissue sample whilst under the same general anaesthetic

**RANDOMISE STATEMENTS**

Q21. Samples may be used for lots of different types of research. The types of research that are allowed to take place are highly regulated by both UK law and also by research ethics committees. Would you be willing to donate samples for the following types of research?

*Research ethics committee - "A committee usually made up of doctors, scientist, patients and the general public. These ensure any research allowed to be done is for the benefit of patients."*



**SCALE:**

1. Definitely yes
2. Probably yes
3. Probably not
4. Definitely not
97. Don't know

**STATEMENTS:**

1. Understanding how our body fights disease
2. Understanding how our genetic makeup influences whether or not we will be affected by certain conditions
3. Testing new treatments
4. Research which involves using cells that come from embryos (*fertilised eggs*)
5. Research involving animals
6. Research conducted outside of the UK

**RANDOMISE ORDER OF STATEMENTS.**

Q22. There are many places where research is performed, such as universities, the NHS, medical research charities such as Cancer Research UK and Arthritis Research UK, pharmaceutical companies and diagnostic companies. These organisations work individually, and often in collaboration, to carry out research, to understand disease, develop tests for diseases and develop and test new treatments.

Would you be willing to donate samples to the following organisations to carry out approved medical research?

*Diagnostic companies - "A company which develops and manufactures medical tests to diagnose diseases"*

**SCALE:**

1. Definitely yes
2. Probably yes
3. Probably not
4. Definitely not
97. Don't know

**STATEMENTS**

1. NHS hospitals
2. Universities
3. Medical research charities
4. Pharmaceutical companies
5. Diagnostic companies

1  
2  
3  
4 Q23. Samples left over following surgery and once any necessary tests have been done, can be  
5 anonymised and used for medical research. On a scale of 1 to 5 with 1 being Not At All Important  
6 and 5 being Extremely Important, how important do you think it is that you are first asked for your  
7 permission (often known as 'consent') for any left over samples to be used for medical research?  
8 *Anonymised - i.e. identifying features such as names and addresses are removed*  
9  
10

11 **SCALE:**

- 12  
13 1. Not at all important  
14 2.  
15 3.  
16 4.  
17 5. Extremely important  
18  
19  
20

21 Q24. There are a number of different ways that a person could give consent for their left over  
22 samples to be used for medical research.  
23  
24

- 25 a) One way is an 'opt-in' system. Opt-in means that a person must specifically be asked for  
26 their permission before any leftover samples can be used in medical research.  
27  
28 b) The other way is an 'opt-out' system. In this system, it is assumed that a person is happy,  
29 after they turn 18 years old, for any leftover samples to be used for medical research unless they  
30 specifically say otherwise.  
31  
32

33 Which of the two systems to donating leftover samples do you prefer?  
34

- 35  
36 1. Opt-in  
37 2. Opt-out  
38 3. No preference  
39 97. Don't know  
40  
41  
42  
43

44 Q25. The current system in the UK is an opt-in system. That means you have to say whether you  
45 want any leftover samples to be donated for medical research. If you were going to be asked to  
46 donate any leftover samples for medical research there are three ways this could be done.  
47  
48

- 49 a) You could be asked to give consent for left over samples to be used for research **every time**  
50 you have samples removed, or  
51  
52 b) you could be asked just **once for life** for any future left over samples to be used for medical  
53 research (with the option of withdrawing your permission at any later point if you wanted to),  
54  
55 c) you could be **asked at certain points** during your life, for example every 10 years by your GP,  
56 or at the start of treatment for a particular condition or health issue.  
57  
58  
59  
60

1  
2  
3 Which of these three approaches do you prefer?  
4  
5

- 6 1. Consent every time
- 7 2. Consent once for life
- 8 3. Consent at certain points
- 9 4. No preference
- 10 97. Don't know
- 11
- 12
- 13

14 Q26. If you were going to be asked to donate left over samples for medical research every time  
15 you had a medical procedure, would you rather this was discussed with you by a health  
16 professional before the medical procedure or afterwards?  
17

- 18 1. Before
- 19 2. After
- 20 3. No preference
- 21 97. Don't know
- 22
- 23
- 24
- 25
- 26

27 Q27. If we adopted a consent once for life system in the UK for adults (i.e. aged 18 years and  
28 over), when would you prefer to be asked about consenting left over samples for medical  
29 research? *Choose up to 3 options.*  
30

- 31 1. When registering at a GP surgery
- 32 2. During a routine GP appointment
- 33 3. When applying for a driving license
- 34 4. When applying for a passport
- 35 5. The first time I visit the hospital
- 36 6. The first time I have a medical procedure (e.g. blood test or surgery)
- 37 98. Other (please specify)
- 38
- 39
- 40
- 41
- 42

43 Q28. What would be your preferred way to register your consent to donate left over samples for  
44 medical research?  
45

- 46 1. Face to face with a health professional
- 47 2. Letter
- 48 3. Email
- 49 4. Telephone
- 50 5. Via a website
- 51 6. Completing a form (from a GP surgery, post office, library or other community centre) and  
52 returning it by post
- 53 98. Other (please specify)
- 54 97. Don't know
- 55
- 56
- 57
- 58
- 59
- 60

1  
2  
3  
4 Q29. If you later decided you didn't want your samples to be used for medical research, what  
5 would be your preferred way to withdraw that consent?  
6  
7

- 8 1. Face to face with a health professional
- 9 2. Letter
- 10 3. Email
- 11 4. Telephone
- 12 5. Via a website
- 13 6. Completing a form (from a GP surgery, post office, library or other community centre) and  
14 returning it by post
- 15 98. Other (please specify)
- 16 97. Don't know
- 17
- 18
- 19
- 20

21  
22 Q30. Imagine you have agreed to donate a sample for medical research. There are a number of  
23 ways you can give consent for that particular sample to be used:  
24

#### 25 STATEMENTS

- 26
- 27 1. You can give consent once for your sample to be used in any future research that has been  
28 approved by a research ethics committee. This type of consent is called Generic Consent.

29  
30  
31 Thinking about Generic Consent, if this was the type of consent you were asked to give, how  
32 likely would you be to donate samples for medical research?  
33

34  
35 *Research ethics committee. "A committee usually made up of doctors, scientist, patients and  
36 the general public. These ensure any research allowed to be done is for the benefit of  
37 patients."*  
38

- 39 2. You can give consent once for your sample to be used in any future research that has been  
40 approved by a research ethics committee but with the option of saying whether there are  
41 certain types of research you don't want your sample to be used for. This type of consent is  
42 called Tiered Consent.  
43

44  
45  
46 Thinking about Tiered Consent, if this was the type of consent you were asked to give, how  
47 likely would you be to donate samples for medical research?  
48

49  
50  
51 *Research ethics committee. "A committee usually made up of doctors, scientist, patients and  
52 the general public. These ensure any research allowed to be done is for the benefit of  
53 patients."*  
54

- 1  
2  
3 3. You can give consent once for the sample to be used for a specific study that you have been  
4 told about, which has been approved by a research ethics committee. The sample will not be  
5 used for any other research other than the particular study you have given consent for. Any  
6 leftover tissue at the end of the study may be destroyed. This type of consent is called  
7 Specific Consent – once only.  
8

9  
10 Thinking about Specific Consent – once only, if this was the type of consent you were asked  
11 to give, how likely would you be to donate samples for medical research?  
12

13  
14 *Research ethics committee. "A committee usually made up of doctors, scientist, patients and*  
15 *the general public. These ensure any research allowed to be done is for the benefit of*  
16 *patients."*  
17

- 18  
19  
20 4. **Lastly**, you can give consent every time for the sample to be used for a specific study that  
21 you have been told about, which has been approved by a research ethics committee. With  
22 this type of consent you would then be contacted and asked for your consent for every new  
23 study in which your sample might be used. This type of consent is called Consent for every  
24 new study.  
25

26  
27 Thinking about Consent for every new study if this was the type of consent you were asked  
28 to give, how likely would you be to donate samples for medical research?  
29

30  
31 *Research ethics committee. "A committee usually made up of doctors, scientist, patients and*  
32 *the general public. These ensure any research allowed to be done is for the benefit of*  
33 *patients."*  
34

35 **SCALE:**

- 36 1. Definitely yes  
37 2. Probably yes  
38 3. Probably not  
39 4. Definitely not  
40 97. Don't know  
41

42  
43  
44 Q31. Which of these four types of consent do you prefer? Please rank them in order of preference.  
45 Put 1 for your first preference; 2 for your second; 3 for your third preference and 4 for your last  
46 preference. If you don't have any preference, and like all 4 equally, tick the 'No preference' you  
47 don't know then tick ' Don't know'  
48  
49

- 50  
51 1. Generic consent  
52 2. Tiered consent  
53 3. Specific consent – once only  
54 4. Consent for every new study  
55 5. No preference  
56 97. Don't know  
57  
58  
59  
60

**ASK TO THOSE PEOPLE WHO DID NOT RANK GENERIC CONSENT AS FIRST CHOICE**

Q32. Generic consent is the most practical type of consent as it is the least costly to put in place. Researchers try their very best to honour donors' wishes, but in some cases where it is too costly to put Tiered or Specific Consent in place, instead of risking using a sample for something the donor feels strongly against, it won't be used at all. If Tiered or Specific consent was not available, what would you do?

1. I would agree to give generic consent
2. I would rather my sample was not used at all
97. Don't know

Q33. Some people feel there are certain types of samples that are more sensitive to donate, for example sperm or left over eggs. If there was a sample that you considered to be sensitive, but were still willing to donate for medical research, which of the four types of consent would you prefer to give?

1. Generic consent
2. Tiered consent
3. Specific consent – once only
4. Consent for every new study
5. No preference
97. Don't know

Q34. Researchers often need to have access to the donor's medical records to be able to interpret the results of their scientific research. However, information such as names or addresses are always removed and are not included with the sample. This is so that the person who donated the sample cannot be identified by the scientist conducting the research or anyone analysing the results of the research. However, the sample may have a code so that someone not involved in the research can identify the individual if necessary, for example, if there was a serious health issue the donor should be aware of.

Would you be willing to have your anonymised medical records linked to your sample?

1. Definitely yes
2. Probably yes
3. Probably not
4. Definitely not
97. Don't know

Q35. Sometimes it can also be helpful for the researcher to have certain information about the lifestyle of the person who donated the sample, for example whether they smoke, drink alcohol, how often they exercise etc. This information might help them to better understand the particular

1  
2  
3 condition they are investigating. Would you be willing to have your anonymised lifestyle  
4 information linked to your sample?  
5

- 6  
7 1. Definitely yes  
8 2. Probably yes  
9 3. Probably not  
10 4. Definitely not  
11 97. Don't know  
12

13  
14  
15 Q36. For some people, it would be interesting to find out what type of medical research is going  
16 on. How would you like to get information on medical research including research on a particular  
17 condition that might use your sample?  
18

- 19  
20 1. Website  
21 2. Newsletter  
22 3. Email  
23 4. Letter  
24 5. Would not be interested in additional information  
25  
26

27  
28 Q37. If you were considering donating whole organs for medical research in the event of your  
29 death, are there any particular organs you would **not** feel comfortable donating?  
30 Please choose all that apply.  
31

- 32  
33 1. Brain  
34 2. Eyes  
35 3. Heart  
36 4. Kidneys  
37 5. Liver  
38 6. Lungs  
39 7. I would not donate any of my organs for medical research  
40 8. None of the above apply as I would be happy to donate either all my organs or whole body  
41 for research  
42  
43 98. Other organs I would not donate (please state)  
44  
45  
46  
47

48  
49 Q38. Sometimes, organs donated for transplant can't be transplanted because for some reason  
50 they are not suitable. However, these organs can still be very useful to researchers. Would you be  
51 willing to donate organs you had intended for transplant for medical research instead if the organ  
52 was not suitable?  
53

- 54  
55 1. Yes, I would donate an organ for research if it was not suitable for transplant  
56 2. No, if they can't be used for transplant I would prefer they were not used at all  
57 3. I would not agree to donate an organ for transplant  
58  
59  
60

1  
2  
3 97. Don't know  
4

5 Q39. If someone wanted to donate their tissue or organs for medical research in the event of  
6 their death, how do you think they should be able to provide their consent to do this?  
7

- 8  
9 1. It should be obtained at the same time as consent for organ transplantation and recorded on  
10 the organ donor register  
11 2. It should be discussed at a GP appointment and recorded in the patients' notes  
12 3. It should be discussed at a hospital and recorded in the patients' notes  
13 98. Other (please specify)  
14 97. Don't know  
15  
16  
17  
18

19 Q40. Someone has indicated in writing that they are willing to donate tissue or organs for medical  
20 research in the event of their death. After the donor's death the relatives decide they disagree with  
21 the donor's wishes. Do you think the relatives should be allowed to override the donor's wishes?  
22

- 23  
24 1. Yes  
25 2. No  
26 97. Don't know  
27  
28  
29

30 Q41. If you have any particular views you would like to share with us about the topics raised in this  
31 questionnaire please feel free to write them here:  
32  
33  
34  
35  
36  
37  
38  
39  
40  
41  
42  
43  
44  
45  
46  
47  
48  
49  
50  
51  
52  
53  
54  
55  
56  
57  
58  
59  
60



## Appendix VI

## Results of survey –unweighted and weighted

| Demographic Data              |            |     |          |     |
|-------------------------------|------------|-----|----------|-----|
|                               | Unweighted |     | Weighted |     |
|                               | N          | %   | N        | %   |
| <b>Sex</b>                    |            |     |          |     |
| Male                          | 504        | 45% | 544      | 49% |
| Female                        | 606        | 55% | 566      | 51% |
| <b>Socioeconomic Group</b>    |            |     |          |     |
| A                             | 41         | 4%  | 44       | 4%  |
| B                             | 215        | 19% | 244      | 22% |
| C1                            | 311        | 28% | 322      | 29% |
| C2                            | 233        | 21% | 233      | 21% |
| D                             | 145        | 13% | 178      | 16% |
| E                             | 165        | 15% | 89       | 8%  |
| <b>Age</b>                    |            |     |          |     |
| 18–24                         | 135        | 12% | 133      | 12% |
| 25–34                         | 184        | 17% | 189      | 17% |
| 35–44                         | 198        | 18% | 200      | 18% |
| 45–54                         | 184        | 17% | 189      | 17% |
| 55–64                         | 176        | 16% | 167      | 15% |
| 65+                           | 233        | 21% | 233      | 21% |
| <b>Occupation</b>             |            |     |          |     |
| Higher managerial             | 41         | 4%  | 44       | 4%  |
| Intermediate managerial       | 215        | 19% | 244      | 22% |
| Supervisory or clerical level | 288        | 26% | 299      | 27% |
| Student                       | 23         | 2%  | 23       | 2%  |
| Skilled manual worker         | 233        | 21% | 233      | 21% |
| Semi or unskilled manual work | 145        | 13% | 178      | 16% |
| Casual worker                 | 12         | 1%  | 6        | 1%  |
| Housewife                     | 9          | 1%  | 5        | 0%  |
| Retired                       | 81         | 7%  | 45       | 4%  |
| Unemployed                    | 46         | 4%  | 24       | 2%  |
| Carer                         | 17         | 2%  | 9        | 1%  |
| Other                         | 0          | 0%  | 0        | 0%  |
| <b>Region</b>                 |            |     |          |     |
| Channel Islands               | 0          | 0%  | 0        | 0%  |
| East of England               | 92         | 8%  | 100      | 9%  |
| East Midlands                 | 57         | 5%  | 78       | 7%  |

## Appendix VI

## Results of survey –unweighted and weighted

|                                                           |      |     |      |     |
|-----------------------------------------------------------|------|-----|------|-----|
| London                                                    | 213  | 19% | 144  | 13% |
| North East                                                | 40   | 4%  | 44   | 4%  |
| North West                                                | 121  | 11% | 122  | 11% |
| Northern Ireland                                          | 30   | 3%  | 33   | 3%  |
| Scotland                                                  | 76   | 7%  | 89   | 8%  |
| South East                                                | 165  | 15% | 155  | 14% |
| South West                                                | 81   | 7%  | 89   | 8%  |
| Wales                                                     | 51   | 5%  | 55   | 5%  |
| West Midlands                                             | 94   | 8%  | 100  | 9%  |
| Yorkshire/Humberlands                                     | 90   | 8%  | 100  | 9%  |
| Not on map                                                | 0    | 0%  | 0    | 0%  |
| <b>Ethnicity</b>                                          |      |     |      |     |
| White or White British                                    | 1057 | 95% | 1065 | 96% |
| Mixed race                                                | 7    | 1%  | 8    | 1%  |
| Asian or Asian British (not Chinese)                      | 18   | 2%  | 17   | 1%  |
| Black or Black British                                    | 19   | 2%  | 12   | 1%  |
| Chinese                                                   | 2    | 0%  | 2    | 0%  |
| Other ethnic group                                        | 4    | 0%  | 2    | 0%  |
| Prefer not to say                                         | 3    | 0%  | 2    | 0%  |
| <b>Religion</b>                                           |      |     |      |     |
| Christianity                                              | 677  | 61% | 673  | 61% |
| Islam                                                     | 13   | 1%  | 11   | 1%  |
| Hinduism                                                  | 6    | 1%  | 6    | 1%  |
| Sikhism                                                   | 0    | 0%  | 0    | 0%  |
| Judaism                                                   | 6    | 1%  | 4    | 1%  |
| Buddhism                                                  | 11   | 1%  | 1    | 0%  |
| Other religion                                            | 15   | 1%  | 8    | 0%  |
| No religion                                               | 370  | 33% | 205  | 38% |
| Prefer not to say                                         | 12   | 1%  | 7    | 1%  |
| <b>To what extent do you consider yourself religious?</b> |      |     |      |     |
| Not at all religious                                      | 234  | 32% | 234  | 32% |
| Moderately religious                                      | 422  | 58% | 424  | 59% |
| Very religious                                            | 64   | 9%  | 56   | 8%  |
| Prefer not to say                                         | 8    | 1%  | 7    | 1%  |
| <b>Education</b>                                          |      |     |      |     |
| No formal qualification                                   | 70   | 6%  | 66   | 6%  |
| GCSE, O level, Scottish Standard Grade or equivalent      | 264  | 24% | 252  | 23% |

## Appendix VI

## Results of survey –unweighted and weighted

|                                          |     |     |     |     |
|------------------------------------------|-----|-----|-----|-----|
| GCE, A-level, Scottish Higher or similar | 214 | 19% | 214 | 19% |
| Vocational (BTEC/NVQ/Diploma)            | 230 | 21% | 237 | 21% |
| Degree level or above                    | 317 | 29% | 330 | 30% |
| Prefer not to say                        | 15  | 1%  | 10  | 1%  |

### Q9 How would you describe your own level of knowledge about the medical research process including the use of human tissue samples?

|                | Unweighted |      | Weighted |      |
|----------------|------------|------|----------|------|
|                | N          | %    | N        | %    |
| No knowledge   | 463        | 42%  | 466      | 42 % |
| Some knowledge | 603        | 54 % | 602      | 54 % |
| Good knowledge | 44         | 4 %  | 43       | 4 %  |

### Q10 Are you or have you ever been affected by a long-standing illness, disability or infirmity which has required continuous or frequent medical attention

|     | Unweighted |      | Weighted |     |
|-----|------------|------|----------|-----|
|     | N          | %    | N        | %   |
| Yes | 399        | 36 % | 391      | 35% |
| No  | 711        | 64 % | 719      | 65% |

### Q11 Has a close family member ever been affected by a long-standing illness, disability or infirmity which has required continuous or frequent medical attention

|     | Unweighted |      | Weighted |     |
|-----|------------|------|----------|-----|
|     | N          | %    | N        | %   |
| Yes | 767        | 69 % | 765      | 69% |
| No  | 343        | 31 % | 345      | 31% |

### Q12 Have you ever had blood or tissue removed during a medical or surgical procedure?

|  | Unweighted | Weighted |
|--|------------|----------|
|--|------------|----------|

## Appendix VI

## Results of survey –unweighted and weighted

|            | N   | %    | N   | %   |
|------------|-----|------|-----|-----|
| Yes        | 446 | 40 % | 444 | 40% |
| No         | 553 | 50 % | 551 | 50% |
| Don't Know | 111 | 10 % | 115 | 10% |

### Q13 Have you ever been asked to donate any blood or tissue for medical research?

|            | Unweighted |      | Weighted |     |
|------------|------------|------|----------|-----|
|            | N          | %    | N        | %   |
| Yes        | 182        | 16 % | 177      | 16% |
| No         | 904        | 81 % | 907      | 82% |
| Don't Know | 24         | 2 %  | 25       | 2%  |

### Q14 Did you agree to donate?

|            | Unweighted |      | Weighted |     |
|------------|------------|------|----------|-----|
|            | N          | %    | N        | %   |
| Yes        | 155        | 85 % | 153      | 86% |
| No         | 23         | 13 % | 21       | 12% |
| Don't Know | 4          | 2 %  | 3        | 2%  |

### Q15 On a scale of 1 to 5 with 1 being Not At All Important and 5 being Extremely Important, how important do you think it is for people to donate samples for medical research?

|                        | Unweighted |      | Weighted |     |
|------------------------|------------|------|----------|-----|
|                        | N          | %    | N        | %   |
| 1 Not at all important | 5          | 0 %  | 4        | 0%  |
| 2                      | 10         | 1 %  | 9        | 1%  |
| 3                      | 78         | 7 %  | 76       | 7%  |
| 4                      | 406        | 37 % | 408      | 37% |
| 5 Extremely important  | 554        | 50 % | 567      | 51% |
| Don't know             | 57         | 5 %  | 46       | 4%  |

## Appendix VI

Results of survey –unweighted and weighted

### Q16 In general, would you like to be asked to donate samples for medical research?

|                | Unweighted |      | Weighted |     |
|----------------|------------|------|----------|-----|
|                | N          | %    | N        | %   |
| Definitely yes | 317        | 29 % | 327      | 29% |
| Probably yes   | 513        | 46 % | 526      | 47% |
| Probably not   | 157        | 14 % | 145      | 13% |
| Definitely not | 42         | 4 %  | 35       | 3%  |
| Don't know     | 81         | 7 %  | 77       | 7%  |

### Q17 Would you donate the following types of samples for medical research if they were left over following the procedure?

|                                  |   | Unweighted |          |          |         |            | Weighted |          |          |         |            |
|----------------------------------|---|------------|----------|----------|---------|------------|----------|----------|----------|---------|------------|
|                                  |   | Def yes    | Prob yes | Prob not | Def not | Don't know | Def yes  | Prob yes | Prob not | Def not | Don't know |
| Blood                            | N | 587        | 433      | 48       | 23      | 19         | 599      | 425      | 48       | 20      | 8          |
|                                  | % | 53%        | 39%      | 4%       | 2%      | 2%         | 54%      | 38%      | 4%       | 2%      | 2%         |
| Skin Tissue                      | N | 520        | 451      | 72       | 32      | 35         | 533      | 451      | 67       | 28      | 32         |
|                                  | % | 47%        | 41%      | 6%       | 3%      | 3%         | 48%      | 41%      | 6%       | 3%      | 3%         |
| Fat                              | N | 530        | 450      | 60       | 32      | 38         | 541      | 449      | 56       | 26      | 37         |
|                                  | % | 48 %       | 41%      | 5%       | 3%      | 3%         | 49%      | 40%      | 5%       | 2%      | 3%         |
| Cancerous Tissue                 | N | 572        | 425      | 52       | 26      | 35         | 586      | 420      | 49       | 22      | 34         |
|                                  | % | 52 %       | 38%      | 5%       | 2%      | 3%         | 53%      | 38%      | 4%       | 2%      | 3%         |
| Liver Tissue                     | N | 463        | 468      | 100      | 38      | 41         | 474      | 476      | 96       | 34      | 39         |
|                                  | % | 42 %       | 42%      | 9%       | 3%      | 4%         | 43%      | 42%      | 9%       | 3%      | 4%         |
| Bone or Cartilage                | N | 472        | 460      | 90       | 46      | 42         | 482      | 460      | 87       | 41      | 40         |
|                                  | % | 43 %       | 41%      | 8%       | 4%      | 4%         | 43%      | 41%      | 8%       | 4%      | 4%         |
| Spare eggs not fertilised during | N | 133        | 159      | 121      | 104     | 89         | 128      | 149      | 111      | 93      | 86         |
|                                  | % | 22 %       | 26%      | 20%      | 17%     | 15%        | 23%      | 26%      | 20%      | 16%     | 15%        |

## Appendix VI

## Results of survey –unweighted and weighted

|               |   |      |     |     |     |     |     |     |     |     |     |
|---------------|---|------|-----|-----|-----|-----|-----|-----|-----|-----|-----|
| IVF *         |   |      |     |     |     |     |     |     |     |     |     |
| Spare embryos | N | 225  | 245 | 217 | 223 | 200 | 230 | 254 | 210 | 213 | 203 |
|               | % | 20 % | 22% | 20% | 20% | 18% | 21% | 23% | 19% | 19% | 18% |

\*Female Only

### Q18 Would you agree to donate the following samples specifically for medical research?

|                                                  |   | Unweighted |          |          |         |            | Weighted |          |          |         |            |
|--------------------------------------------------|---|------------|----------|----------|---------|------------|----------|----------|----------|---------|------------|
|                                                  |   | Def yes    | Prob yes | Prob not | Def not | Don't know | Def yes  | Prob yes | Prob not | Def not | Don't know |
| Saliva                                           | N | 568        | 423      | 54       | 30      | 35         | 581      | 413      | 55       | 27      | 34         |
|                                                  | % | 51 %       | 38%      | 5%       | 3%      | 3%         | 52%      | 37%      | 5%       | 2%      | 3%         |
| Urine                                            | N | 553        | 432      | 61       | 33      | 31         | 566      | 424      | 60       | 30      | 30         |
|                                                  | % | 50 %       | 39%      | 5%       | 3%      | 3%         | 51%      | 38%      | 5%       | 3%      | 3%         |
| Blood                                            | N | 455        | 448      | 118      | 47      | 42         | 496      | 446      | 107      | 46      | 42         |
|                                                  | % | 41 %       | 40%      | 11%      | 4%      | 4%         | 42%      | 40%      | 10%      | 4%      | 4%         |
| Tissue collected requiring a local anaesthetic   | N | 273        | 463      | 197      | 100     | 77         | 283      | 471      | 190      | 88      | 78         |
|                                                  | % | 25 %       | 42%      | 18%      | 9%      | 7%         | 26%      | 42%      | 17%      | 8%      | 7%         |
| Tissue collected requiring a general anaesthetic | N | 166        | 286      | 310      | 235     | 113        | 172      | 300      | 309      | 214     | 115        |
|                                                  | % | 15 %       | 26%      | 28%      | 21%     | 10%        | 16%      | 27%      | 28%      | 19%     | 10%        |
| Sperm *                                          | N | 120        | 171      | 104      | 66      | 43         | 135      | 188      | 111      | 64      | 46         |
|                                                  | % | 24 %       | 34%      | 21%      | 13%     | 9%         | 25%      | 35%      | 20%      | 12%     | 9%         |

\*Men only

## Appendix VI

## Results of survey –unweighted and weighted

| Q19 In the event of your death, would you be willing to donate the following samples for medical research? |   |            |          |          |         |            |          |          |          |         |            |  |
|------------------------------------------------------------------------------------------------------------|---|------------|----------|----------|---------|------------|----------|----------|----------|---------|------------|--|
|                                                                                                            |   | Unweighted |          |          |         |            | Weighted |          |          |         |            |  |
|                                                                                                            |   | Def yes    | Prob yes | Prob not | Def not | Don't know | Def yes  | Prob yes | Prob not | Def not | Don't know |  |
| A small sample of your liver                                                                               | N | 485        | 390      | 88       | 51      | 96         | 491      | 391      | 84       | 48      | 96         |  |
|                                                                                                            | % | 44 %       | 35%      | 8%       | 5%      | 9%         | 44%      | 35%      | 8%       | 4%      | 9%         |  |
| A small sample of your brain                                                                               | N | 429        | 304      | 166      | 96      | 115        | 438      | 305      | 158      | 94      | 116        |  |
|                                                                                                            | % | 39 %       | 27%      | 15%      | 9%      | 10%        | 39%      | 27%      | 14%      | 8%      | 10%        |  |
| A whole liver                                                                                              | N | 430        | 319      | 158      | 87      | 116        | 438      | 316      | 154      | 84      | 118        |  |
|                                                                                                            | % | 39 %       | 29%      | 14%      | 8%      | 10%        | 39%      | 28%      | 14%      | 8%      | 11%        |  |
| A whole brain                                                                                              | N | 353        | 234      | 221      | 150     | 152        | 360      | 236      | 214      | 145     | 155        |  |
|                                                                                                            | % | 32 %       | 21%      | 20%      | 14%     | 14%        | 32%      | 21%      | 19%      | 13%     | 14%        |  |

| Q20 You are having surgery for a health issue which requires a general anaesthetic. The surgeon asks you whether you would be willing to consent to any additional tissue? |   |            |          |          |         |            |          |          |          |         |            |  |
|----------------------------------------------------------------------------------------------------------------------------------------------------------------------------|---|------------|----------|----------|---------|------------|----------|----------|----------|---------|------------|--|
|                                                                                                                                                                            |   | Unweighted |          |          |         |            | Weighted |          |          |         |            |  |
|                                                                                                                                                                            |   | Def yes    | Prob yes | Prob not | Def not | Don't know | Def yes  | Prob yes | Prob not | Def not | Don't know |  |
| From the same part of the body                                                                                                                                             | N | 328        | 530      | 115      | 51      | 86         | 342      | 523      | 112      | 50      | 83         |  |
|                                                                                                                                                                            | % | 30 %       | 48%      | 10%      | 5%      | 8%         | 31%      | 47%      | 10%      | 5%      | 7%         |  |
| Samples taken from an area close by                                                                                                                                        | N | 219        | 481      | 212      | 89      | 109        | 229      | 490      | 206      | 81      | 104        |  |
|                                                                                                                                                                            | % | 20 %       | 43%      | 19%      | 8%      | 10%        | 21%      | 44%      | 19%      | 7%      | 9%         |  |
| Samples involving an                                                                                                                                                       | N | 154        | 336      | 298      | 204     | 118        | 164      | 348      | 301      | 180     | 118        |  |
|                                                                                                                                                                            | % | 14 %       | 30%      | 27%      | 18%     | 11%        | 15%      | 31%      | 27%      | 16%     | 11%        |  |

## Appendix VI

## Results of survey –unweighted and weighted

|                      |  |  |  |  |  |  |  |  |  |  |  |
|----------------------|--|--|--|--|--|--|--|--|--|--|--|
| additional procedure |  |  |  |  |  |  |  |  |  |  |  |
|----------------------|--|--|--|--|--|--|--|--|--|--|--|

| Q21 You are having surgery for a health issue which requires a general anaesthetic. The surgeon asks you whether you would be willing to consent to any additional tissue? |   |            |          |          |         |            |          |          |          |         |            |
|----------------------------------------------------------------------------------------------------------------------------------------------------------------------------|---|------------|----------|----------|---------|------------|----------|----------|----------|---------|------------|
|                                                                                                                                                                            |   | Unweighted |          |          |         |            | Weighted |          |          |         |            |
|                                                                                                                                                                            |   | Def yes    | Prob yes | Prob not | Def not | Don't know | Def yes  | Prob yes | Prob not | Def not | Don't know |
| Understanding how our body fights disease                                                                                                                                  | N | 390        | 558      | 72       | 27      | 63         | 399      | 554      | 71       | 24      | 62         |
|                                                                                                                                                                            | % | 35 %       | 50%      | 6%       | 2%      | 6%         | 36%      | 50%      | 6%       | 2%      | 6%         |
| Understanding how our genetic makeup...                                                                                                                                    | N | 305        | 558      | 115      | 47      | 85         | 312      | 564      | 107      | 43      | 83         |
|                                                                                                                                                                            | % | 27 %       | 50%      | 10%      | 4%      | 8%         | 28%      | 51%      | 10%      | 4%      | 8%         |
| Research that is testing new treatments                                                                                                                                    | N | 318        | 511      | 132      | 52      | 97         | 325      | 502      | 133      | 50      | 99         |
|                                                                                                                                                                            | % | 29 %       | 46%      | 12%      | 5%      | 9%         | 29%      | 45%      | 12%      | 5%      | 9%         |
| Research involving cells from embryos                                                                                                                                      | N | 157        | 304      | 228      | 214     | 207        | 167      | 319      | 225      | 199     | 200        |
|                                                                                                                                                                            | % | 14 %       | 27%      | 21%      | 19%     | 19%        | 15%      | 29%      | 20%      | 18%     | 18%        |
| Research involving animals                                                                                                                                                 | N | 107        | 270      | 281      | 318     | 134        | 117      | 285      | 271      | 304     | 132        |
|                                                                                                                                                                            | % | 10%        | 24%      | 25%      | 29%     | 12%        | 11%      | 26%      | 24%      | 27%     | 12%        |
| Research outside the UK                                                                                                                                                    | N | 109        | 273      | 350      | 199     | 179        | 115      | 277      | 349      | 199     | 170        |
|                                                                                                                                                                            | % | 10 %       | 25%      | 32%      | 18%     | 16%        | 10%      | 25%      | 31%      | 18%     | 15%        |



## Appendix VI

## Results of survey –unweighted and weighted

| Q22 Would you be willing to donate samples to be used by the following organisations? |   |            |          |          |         |            |          |          |          |         |            |
|---------------------------------------------------------------------------------------|---|------------|----------|----------|---------|------------|----------|----------|----------|---------|------------|
|                                                                                       |   | Unweighted |          |          |         |            | Weighted |          |          |         |            |
|                                                                                       |   | Def yes    | Prob yes | Prob not | Def not | Don't know | Def yes  | Prob yes | Prob not | Def not | Don't know |
| NHS Hospitals                                                                         | N | 367        | 570      | 69       | 31      | 73         | 379      | 569      | 65       | 28      | 70         |
|                                                                                       | % | 33 %       | 51%      | 6%       | 3%      | 7%         | 34%      | 51%      | 6%       | 2%      | 6%         |
| Universities                                                                          | N | 243        | 515      | 185      | 56      | 111        | 255      | 519      | 173      | 54      | 108        |
|                                                                                       | % | 22 %       | 46%      | 17%      | 5%      | 10%        | 23%      | 47%      | 16%      | 5%      | 10%        |
| Medical Research Charities                                                            | N | 307        | 563      | 107      | 41      | 92         | 311      | 561      | 108      | 39      | 91         |
|                                                                                       | % | 28 %       | 51%      | 10%      | 4%      | 8%         | 28%      | 51%      | 10%      | 4%      | 8%         |
| Pharmaceutical Companies                                                              | N | 138        | 487      | 233      | 93      | 159        | 139      | 490      | 227      | 95      | 161        |
|                                                                                       | % | 12 %       | 44%      | 21%      | 8%      | 14%        | 12%      | 44%      | 20%      | 9%      | 14%        |
| Diagnostic Companies                                                                  | N | 187        | 515      | 180      | 74      | 154        | 182      | 511      | 183      | 74      | 159        |
|                                                                                       | % | 17 %       | 46%      | 16%      | 7%      | 14%        | 16%      | 46%      | 17%      | 7%      | 14%        |

**Q23 How important do you think it is that you are first asked for your permission (often known as 'consent') for any leftover samples to be used for medical research?**

|                        | Unweighted |      | Weighted |     |
|------------------------|------------|------|----------|-----|
|                        | N          | %    | N        | %   |
| 1 Not at all important | 40         | 4 %  | 42       | 4%  |
| 2                      | 41         | 4 %  | 43       | 4%  |
| 3                      | 104        | 9 %  | 103      | 9%  |
| 4                      | 274        | 25 % | 268      | 24% |
| 5 Extremely important  | 615        | 55 % | 614      | 55% |
| Don't know             | 36         | 3 %  | 40       | 4%  |

## Appendix VI

Results of survey –unweighted and weighted

**Q24 How important do you think it is that you are first asked for your permission (often known as 'consent') for any leftover samples to be used for medical research?**

|               | Unweighted |      | Weighted |     |
|---------------|------------|------|----------|-----|
|               | N          | %    | N        | %   |
| Opt-in        | 605        | 55 % | 598      | 54% |
| Opt-out       | 308        | 28 % | 321      | 29% |
| No preference | 151        | 14 % | 146      | 13% |
| Don't know    | 46         | 4 %  | 45       | 4%  |

**Q25 Which of these three approaches do you prefer?**

|                           | Unweighted |      | Weighted |     |
|---------------------------|------------|------|----------|-----|
|                           | N          | %    | N        | %   |
| Consent every time        | 472        | 43 % | 480      | 43% |
| Consent once for life     | 231        | 21 % | 237      | 21% |
| Consent at certain points | 301        | 27 % | 298      | 27% |
| No preference             | 82         | 7 %  | 72       | 7%  |
| Don't know                | 24         | 2 %  | 22       | 2%  |

**Q26 If you were going to be asked to donate left over samples for medical research every time you had a medical procedure, would you rather this was discussed with you by a health professional before the medical procedure or afterwards?**

|               | Unweighted |      | Weighted |     |
|---------------|------------|------|----------|-----|
|               | N          | %    | N        | %   |
| Before        | 897        | 81 % | 908      | 82% |
| After         | 48         | 4 %  | 48       | 4%  |
| No preference | 151        | 14 % | 142      | 13% |
| Don't know    | 14         | 1 %  | 12       | 1%  |

## Appendix VI

## Results of survey –unweighted and weighted

**Q27 If a consent once for life system was in place, when would you prefer to be asked about consenting left over samples for medical research?**

|                                     | Unweighted |      | Weighted |     |
|-------------------------------------|------------|------|----------|-----|
|                                     | N          | %    | N        | %   |
| When registering at a GP surgery    | 425        | 39 % | 419      | 38% |
| During a routine GP appointment     | 386        | 35 % | 380      | 34% |
| When applying for a driving licence | 83         | 8 %  | 88       | 8%  |
| When applying for a passport        | 75         | 7 %  | 80       | 7%  |
| The first time I visit the hospital | 233        | 21 % | 228      | 21% |
| The first time I have a medical     | 513        | 47 % | 510      | 46% |

**Q28 If a consent once for life system was in place, when would you prefer to be asked about consenting left over samples for medical research?**

|                                            | Unweighted |      | Weighted |     |
|--------------------------------------------|------------|------|----------|-----|
|                                            | N          | %    | N        | %   |
| Face to face with a health professional    | 720        | 65 % | 727      | 65% |
| Letter                                     | 66         | 6 %  | 64       | 6%  |
| Email                                      | 30         | 3 %  | 32       | 3%  |
| Telephone                                  | 14         | 1 %  | 13       | 1%  |
| Via a website                              | 60         | 5 %  | 61       | 6%  |
| Completing a form and returning it by post | 161        | 15 % | 160      | 14% |
| Other (please specify)                     | 4          | 0 %  | 4        | 0%  |
| Don't know                                 | 55         | 5 %  | 49       | 4%  |

**Q29 If you later decided you didn't want your samples to be used for medical research, what would be your preferred way to withdraw that consent?**

|                                         | Unweighted |      | Weighted |     |
|-----------------------------------------|------------|------|----------|-----|
|                                         | N          | %    | N        | %   |
| Face to face with a health professional | 421        | 38 % | 424      | 38% |
| Letter                                  | 95         | 9 %  | 92       | 8%  |
| Email                                   | 89         | 8 %  | 93       | 8%  |
| Telephone                               | 56         | 5 %  | 51       | 5%  |
| Via a website                           | 137        | 12 % | 144      | 13% |

## Appendix VI

## Results of survey –unweighted and weighted

|                                            |     |      |     |     |
|--------------------------------------------|-----|------|-----|-----|
| Completing a form and returning it by post | 243 | 22 % | 244 | 22% |
| Other (please specify)                     | 8   | 1 %  | 6   | 1%  |
| Don't know                                 | 61  | 5 %  | 55  | 5%  |

### Q30 How likely would you be to donate samples for medical research using the following models of consent?

|                                      |   | Unweighted |          |          |         |            | Weighted |          |          |         |            |
|--------------------------------------|---|------------|----------|----------|---------|------------|----------|----------|----------|---------|------------|
|                                      |   | Def yes    | Prob yes | Prob not | Def not | Don't know | Def yes  | Prob yes | Prob not | Def not | Don't know |
| Generic                              | N | 216        | 528      | 163      | 64      | 139        | 228      | 538      | 154      | 52      | 38         |
|                                      | % | 19 %       | 48%      | 15%      | 6%      | 13%        | 21%      | 48%      | 14%      | 5%      | 12%        |
| Tiered                               | N | 242        | 549      | 125      | 55      | 139        | 244      | 560      | 124      | 49      | 133        |
|                                      | % | 22 %       | 49%      | 11%      | 5%      | 13%        | 22%      | 50%      | 11%      | 4%      | 12%        |
| Specific                             | N | 336        | 553      | 88       | 28      | 105        | 339      | 551      | 89       | 29      | 102        |
|                                      | % | 30 %       | 50%      | 8%       | 3%      | 9%         | 31%      | 50%      | 8%       | 3%      | 9%         |
| Specific consent for every new study | N | 293        | 560      | 110      | 27      | 120        | 300      | 560      | 109      | 26      | 115        |
|                                      | % | 26 %       | 50%      | 10%      | 2%      | 11%        | 27%      | 50%      | 10%      | 2%      | 10%        |

### Q31 Which of these four types of consent do you prefer?

| Preferences     | Generic    |     |          |     |
|-----------------|------------|-----|----------|-----|
|                 | Unweighted |     | Weighted |     |
|                 | N          | %   | N        | %   |
| 1 <sup>st</sup> | 200        | 18% | 207      | 19% |
| 2 <sup>nd</sup> | 159        | 14% | 163      | 15% |
| 3 <sup>rd</sup> | 168        | 15% | 168      | 15% |
| 4 <sup>th</sup> | 344        | 31% | 327      | 30% |
| Tiered          |            |     |          |     |
| 1 <sup>st</sup> | 156        | 14% | 152      | 14% |
| 2 <sup>nd</sup> | 246        | 22% | 252      | 23% |

## Appendix VI

## Results of survey –unweighted and weighted

|                              |     |     |     |     |
|------------------------------|-----|-----|-----|-----|
| 3 <sup>rd</sup>              | 360 | 32% | 355 | 32% |
| 4 <sup>th</sup>              | 105 | 10% | 106 | 10% |
| <b>Specific (once only)</b>  |     |     |     |     |
| 1 <sup>st</sup>              | 198 | 18% | 183 | 17% |
| 2 <sup>nd</sup>              | 306 | 28% | 304 | 27% |
| 3 <sup>rd</sup>              | 202 | 18% | 209 | 19% |
| 4 <sup>th</sup>              | 161 | 15% | 169 | 15% |
| <b>Specific (every time)</b> |     |     |     |     |
| 1 <sup>st</sup>              | 341 | 31% | 323 | 29% |
| 2 <sup>nd</sup>              | 157 | 14% | 146 | 13% |
| 3 <sup>rd</sup>              | 138 | 12% | 133 | 12% |
| 4 <sup>th</sup>              | 258 | 23% | 263 | 24% |
| Don't Know                   | 63  | 6%  | 62  | 6%  |
| No Preference                | 181 | 16% | 183 | 17% |

**Q32 If your preferred system of consent was not available, what would you do?**

|                                              | Unweighted |      | Weighted |     |
|----------------------------------------------|------------|------|----------|-----|
|                                              | N          | %    | N        | %   |
| I would agree to give generic consent        | 348        | 52 % | 350      | 53% |
| I would rather my sample was not used at all | 187        | 28 % | 172      | 26% |
| Don't know                                   | 133        | 20 % | 135      | 21% |

**Q33 If there was a sample that you considered to be sensitive, but were still willing to donate for medical research, which of the four types of consent would you prefer to give?**

|                              | Unweighted |      | Weighted |     |
|------------------------------|------------|------|----------|-----|
|                              | N          | %    | N        | %   |
| Generic Consent              | 131        | 12 % | 135      | 12% |
| Tiered Consent               | 105        | 9 %  | 101      | 9%  |
| Specific Consent - once only | 246        | 22 % | 228      | 21% |
| Consent for every new study  | 278        | 25 % | 288      | 26% |

## Appendix VI

## Results of survey –unweighted and weighted

|               |     |      |     |     |
|---------------|-----|------|-----|-----|
| No Preference | 206 | 19 % | 216 | 19% |
| Don't Know    | 144 | 13 % | 142 | 13% |

### Q34 Would you be willing to have your anonymised medical records linked to your sample?

|                | Unweighted |      | Weighted |     |
|----------------|------------|------|----------|-----|
|                | N          | %    | N        | %   |
| Definitely yes | 266        | 24 % | 279      | 25% |
| Probably yes   | 493        | 44 % | 497      | 45% |
| Probably not   | 165        | 15 % | 157      | 14% |
| Definitely not | 77         | 7 %  | 71       | 6%  |
| Don't know     | 109        | 10 % | 107      | 10% |

### Q35 Would you be willing to have your anonymised lifestyle information linked to your sample?

|                | Unweighted |      | Weighted |     |
|----------------|------------|------|----------|-----|
|                | N          | %    | N        | %   |
| Definitely yes | 377        | 34 % | 398      | 35% |
| Probably yes   | 530        | 48 % | 527      | 47% |
| Probably not   | 90         | 8 %  | 90       | 8%  |
| Definitely not | 48         | 4 %  | 43       | 4%  |
| Don't know     | 65         | 6 %  | 61       | 5%  |

### Q36 How would you like to get information on medical research including research on a particular condition that might use your sample?

|                                                   | Unweighted |      | Weighted |     |
|---------------------------------------------------|------------|------|----------|-----|
|                                                   | N          | %    | N        | %   |
| Website                                           | 295        | 27 % | 304      | 27% |
| Newsletter                                        | 104        | 9 %  | 97       | 9%  |
| Email                                             | 302        | 27 % | 315      | 28% |
| Letter                                            | 241        | 22 % | 228      | 21% |
| Would not be interested in additional information | 168        | 15 % | 166      | 15% |

## Appendix VI

## Results of survey –unweighted and weighted

**Q37 Are there any particular organs you would not feel comfortable donating in the event of your death?**

|         | Unweighted |     | Weighted |     |
|---------|------------|-----|----------|-----|
|         | N          | %   | N        | %   |
| Brain   | 337        | 31% | 329      | 30% |
| Eyes    | 307        | 28% | 308      | 28% |
| Heart   | 128        | 12% | 121      | 11% |
| Kidneys | 60         | 5 % | 59       | 5%  |
| Liver   | 68         | 6 % | 65       | 6%  |
| Lungs   | 67         | 6%  | 63       | 6%  |

**Q38 If you were considering donating whole organs for medical research in the event of your death, are there any particular organs you would not feel comfortable donating?**

|                                                                                   | Unweighted |      | Weighted |     |
|-----------------------------------------------------------------------------------|------------|------|----------|-----|
|                                                                                   | N          | %    | N        | %   |
| Yes, I would donate an organ for research if it was not suitable for transplant   | 755        | 68 % | 766      | 69% |
| No, if they can't be used for transplant I would prefer they were not used at all | 125        | 11 % | 121      | 11% |
| I would not agree to donate an organ for transplant                               | 96         | 9 %  | 95       | 9%  |
| Don't know                                                                        | 134        | 12 % | 128      | 12% |

## Appendix VI

Results of survey –unweighted and weighted

| Q40 Would you be willing to have your anonymised lifestyle information linked to your sample?                        |            |      |            |      |          |      |
|----------------------------------------------------------------------------------------------------------------------|------------|------|------------|------|----------|------|
|                                                                                                                      | Unweighted |      | Unweighted |      | Weighted |      |
|                                                                                                                      | N          | %    | N          | %    | N        | %    |
| Yes                                                                                                                  | 174        | 16 % | 166        | 15 % | 166      | 15 % |
| No                                                                                                                   | 789        | 77 % | 580        | 52 % | 800      | 72 % |
| Don't know                                                                                                           | 147        | 13 % | 144        | 13 % | 144      | 13 % |
| It should be obtained at the same time as consent for organ transplantation and recorded on the organ donor register |            |      | 270        | 24 % | 267      | 24 % |
| It should be discussed at a GP appointment and recorded in the patients' notes                                       |            |      | 140        | 13 % | 143      | 13 % |
| Other                                                                                                                |            |      | 13         | 1 %  | 14       | 1 %  |
| Don't know                                                                                                           |            |      | 107        | 10 % | 108      | 10 % |

Note: percentages may not add up to 100% due to rounding.



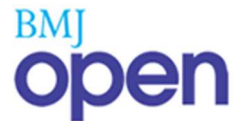

**Public views on the donation and use of human biological samples in biomedical research – a mixed methods study**

|                                    |                                                                                                                                                                                                                                                                                                                                                                                                                                                         |
|------------------------------------|---------------------------------------------------------------------------------------------------------------------------------------------------------------------------------------------------------------------------------------------------------------------------------------------------------------------------------------------------------------------------------------------------------------------------------------------------------|
| Journal:                           | <i>BMJ Open</i>                                                                                                                                                                                                                                                                                                                                                                                                                                         |
| Manuscript ID:                     | bmjopen-2013-003056.R1                                                                                                                                                                                                                                                                                                                                                                                                                                  |
| Article Type:                      | Research                                                                                                                                                                                                                                                                                                                                                                                                                                                |
| Date Submitted by the Author:      | 28-May-2013                                                                                                                                                                                                                                                                                                                                                                                                                                             |
| Complete List of Authors:          | Lewis, Celine; Genetic Alliance UK, Unit 4D Leroy House<br>Clotworthy, Margaret; Human Focused Testing,<br>Hilton, Shona; Medical Research Council, CSO Social & Public Health<br>Sciences Unit<br>Magee, Caroline; National Cancer Research Institute, Confederation of<br>Cancer Biobanks<br>Robertson, Mark; AstraZeneca, Science Policy & Relations<br>Stubbins, Lesley; GlaxoSmithKline, Medicines Research Centre<br>Corfield, Jule; Areteva Ltd, |
| <b>Primary Subject<br>Heading</b>: | Public health                                                                                                                                                                                                                                                                                                                                                                                                                                           |
| Secondary Subject Heading:         | Genetics and genomics, Health policy                                                                                                                                                                                                                                                                                                                                                                                                                    |
| Keywords:                          | PUBLIC HEALTH, GENETICS, Health policy < HEALTH SERVICES<br>ADMINISTRATION & MANAGEMENT, PATHOLOGY                                                                                                                                                                                                                                                                                                                                                      |
|                                    |                                                                                                                                                                                                                                                                                                                                                                                                                                                         |

SCHOLARONE™  
Manuscripts

only

**Manuscript title:** Public views on the donation and use of human biological samples in biomedical research – a mixed methods study

Celine Lewis<sup>1</sup>, Margaret Clotworthy<sup>2</sup>, Shona Hilton<sup>3</sup>, Caroline Magee<sup>4</sup>, Mark J Robertson<sup>5</sup>, Lesley J Stubbins<sup>6</sup>, Julie Corfield<sup>7</sup>

<sup>1</sup>Genetic Alliance UK, Unit 4D Leroy House, 436 Essex Road, London, N1 3LY, UK

<sup>2</sup>Human Focused Testing, 50 the Barns, Littleport, Cambridge, CB6 1GG, UK

<sup>3</sup>Medical Research Council/CSO Social & Public Health Sciences Unit, 4 Lilybank Gardens, Glasgow, G12 8RZ, UK

<sup>4</sup>Confederation of Cancer Biobanks, National Cancer Research Institute, Angel Building, 407 St John Street, London EC1V 4AD, UK

<sup>5</sup>AstraZeneca, Science Policy & Relations, 11G43 Mereside, Alderley Park, Macclesfield, Cheshire SK10 4TF, UK

<sup>6</sup>GlaxoSmithKline Medicines Research Centre, Gunnels Wood Road, Stevenage, Hertfordshire, SG1 2NY, UK

<sup>7</sup>Areteva Ltd, BioCity, Nottingham, NG1 1GF, UK

**Running title:** Views on donating and use of biosamples – the UK public's preferences

**Keywords:** biobanking, public willingness, public views, public preferences, biomedical research

**Correspondence to:**

Dr Celine Lewis

Genetic Alliance UK,

Unit 4D Leroy House,

436 Essex Road,

London,

N1 3QP

**Email:** celine@geneticalliance.org.uk

**Word count:** 5367

**ABSTRACT**

**Objective:** A mixed methods study exploring the UK general public's willingness to donate human biosamples (HBS) for biomedical research.

**Setting:** Cross-sectional focus groups followed by an online survey.

**Participants:** Twelve focus groups (81 participants) selectively sampled to reflect a range of demographic groups; 1110 survey responders recruited through a stratified sampling method with quotas set on sex, age, geographical location, socio-economic group and ethnicity.

**Main outcome measures:** 1) identify participants' willingness to donate HBS for biomedical research; 2) explore acceptability towards donating different types of HBS in various settings; and 3) explore preferences regarding use and access to HBS.

**Results:** 87% of survey participants thought donation of HBS was important; 75% wanted to be asked to donate in general. Responders who self-reported having some or good knowledge of the medical research process were significantly more likely to want to donate ( $p < 0.001$ ). Reasons why focus group participants saw donation as important included: it was a good way of reciprocating for medical treatment received; it was an important way of developing drugs and treatments; residual tissue would otherwise go to waste; they or family members might benefit. The most controversial types of HBS to donate included: brain post mortem (29% would donate); eyes post mortem (35%); embryos (44%); spare eggs (48%) and sperm (58%). Concerning use of samples, there were concerns over animal research (34%), research conducted outside the UK (35%), and research conducted by pharmaceutical companies (56%), although education and discussion were found to alleviate such concerns during focus group discussions.

**Conclusions:** There is a high level of public support and willingness to donate HBS for biomedical research. Underlying concerns exist regarding the use of certain types of HBS and conditions under which they are used. Improved education and more controlled forms of consent for sensitive samples may mitigate such concerns.

## ARTICLE SUMMARY

### Article focus

- To explore the UK public's willingness to donate: residual biosamples following a medical procedure; biosamples donated as 'healthy volunteers'; additional biosamples during surgery; and biosamples post-mortem for medical research;
- The acceptability towards donating different types of biosamples in various settings;
- Preferences regarding use and access to biosamples.

### Key messages

- There is a high level of public support for biomedical research and willingness to donate samples for this purpose.
- Those responders who self-reported having some or good knowledge of the medical research process were significantly more likely to want to be asked to donate, supporting the need for public education to improve understanding of the research process and the contribution HBS make to this.
- Concerns exist regarding the use of certain types of samples, the conditions under which they are used and data security; greater transparency and discussion of the safeguards that exist in research is likely to alleviate some of these concerns. More focused communication may also help address the issue that certain subgroups are under-represented and that certain kinds of tissue are infrequently donated.

### Strengths and limitations of this study

- This study contributes further to our understanding of the UK public's views regarding the types of human biological samples acceptable to donate, under what circumstances and for what research purposes. This study highlights the importance of involving the public in more transparent dialogue about the use of biosamples to encourage greater public involvement and support for this area.
- This study presented participants with a series of hypothetical questions about willingness to donate biosamples for medical research. Therefore the findings may not necessarily correlate with actual behaviour.

## INTRODUCTION

A gradual shift in the approach to biomedical research has accelerated use of human biological samples (HBS) and the establishment of biobanks with associated skills and infrastructure ('biobanking') to acquire, preserve and distribute this increasingly valuable resource. Biobanks are important custodians of HBS collections, usually with access to the donors' de-identified phenotypic and clinical data[1]. Samples can comprise human materials of all kinds, including organs, tissues, biofluids such as blood, and genetic materials, such as DNA. They may be obtained from a variety of donated sources: from healthy volunteers or as residual tissue surplus to diagnostic requirements following a medical procedure, or alternatively retrieved post-mortem. Sample collections may be population-based or disease-specific, originating from a wide range of people with differing demographics, health, behaviours and lifestyles. Moreover, they may be used by a variety of research organisations, including public and private enterprises.

Public willingness to donate HBS is essential to ensure the continued provision of samples for research[2]; hence numerous studies have been conducted to examine this issue[3-7]. These studies have shown that the public is generally positive towards research using donated HBS[4-6] and the majority is in principle willing to donate[3,7]. Less well known are the public's views regarding the types of HBS acceptable to donate, under what circumstances and for what research purposes, although some research does exist in these areas. For example, research has shown the public are generally willing to donate diseased tissue or 'waste material' (such as cancerous tissue or placental tissue) for biomedical research, however, donation of eyes, brains, lungs and bone is far more contentious[7-9]. Regarding access to tissues, research by publicly-funded academic researchers has been shown to cause few concerns, in comparison to research conducted by commercial entities[10-12]. These issues are important to address to provide an insight into the key drivers motivating or preventing people from donating. Knowledge of these can also help inform biobanking governance and ensure consent procedures and patient information addresses any concerns which the public may have. This is important to help the public understand the need for, and the use of, HBS in biomedical research as well as to increase transparency and engender trust with the public. This study was conducted to broaden our understanding in these areas. Moreover, the findings are intended to inform a biobanking policy for STRATUM (Strategic Tissue Repository Alliance Through Unified Methods), a UK Government Technology Strategy Board and Industry-funded project seeking to address the problem that there are insufficient numbers of HBS and associated clinical data of adequate quality to fully support biomedical research

1  
2  
3 in the UK. This research will also help inform the design of new consent templates and  
4 deliver guidance and strategies around the consent process for biobanks and  
5 researchers.  
6

7  
8 The aims of this study were to 1) identify participants' willingness to donate HBS for  
9 biomedical research; 2) explore acceptability towards donating different types of HBS in  
10 various settings; and 3) explore preferences regarding use and access to HBS. Public  
11 views and preferences regarding consent procedures were also investigated and are  
12 described elsewhere (Consent for the use of human biological samples for biomedical  
13 research – a mixed methods study exploring the UK public's preferences, 2013,  
14 submitted manuscript).  
15  
16  
17

## 18 19 **METHODS**

20  
21 This was a mixed methods study comprising qualitative focus groups and a quantitative  
22 on-line survey. Focus groups were chosen as this method helps people explore and  
23 illuminate their views through debate within the group. They can also help facilitate the  
24 expression of ideas that might be left underdeveloped in an interview[13]. Focus groups  
25 have been used successfully to study the attitudes of the general public in relation to  
26 biobanking in previous research [14,15]. Ethical approval for the study was granted by  
27 the University of Manchester Research Ethics Committee in April 2012. A more detailed  
28 presentation of the methods can be found in the sister paper related to this study  
29 (Consent for the use of human biological samples for biomedical research – a mixed  
30 methods study exploring the UK public's preferences, 2013, submitted manuscript).  
31  
32  
33  
34  
35  
36

### 37 **Focus groups**

38  
39 Twelve focus groups (including one pilot group) were conducted between May and July  
40 2012 in six different geographic locations across the UK. Participants were recruited  
41 face-to-face in the street by the market research company The Focus Group. Participants  
42 were purposively sampled; each group chosen to reflect a particular demographic (age,  
43 socio-economic group (SEG), ethnicity, 'patients' who were affected by a condition or  
44 had had an operation in the past two years) in order to gather a wide spectrum of views  
45 and enable comparisons across groups. Prior to the day, focus group participants were  
46 given an information sheet about the use of biosamples in research in order that they  
47 had some background knowledge about the subject matter and to get them thinking  
48 about the key issues (Appendix I). Focus groups were held in 'neutral' locations such as  
49 hotel conference rooms or church halls, facilitated by an experienced facilitator (CL) and  
50 digitally recorded.  
51  
52  
53  
54  
55  
56  
57  
58  
59  
60

1  
2  
3 The topic guide explored participants' views on: willingness to donate and acceptability  
4 of donating different types of HBS; in what circumstances; for what purposes; and to  
5 whom (supplementary files: Appendix II). Recordings were transcribed and the software  
6 package NVivo version 9 (QSR International, Pty Ltd) used to facilitate data analysis.  
7 This comprised grouping responses to questions into broad thematic categories which  
8 were then refined through sub-codes. Coding was conducted by CL and verified by a  
9 second researcher to ensure inter-rater reliability. Any discrepancies were discussed  
10 between the two researchers until consensus was reached.  
11  
12  
13  
14

## 15 **Survey**

16  
17  
18 The findings from the focus groups were used to inform development of a quantitative  
19 survey used to canvas public opinion on the issues of interest across a representative  
20 sample of the UK population (supplementary files: Appendix III). Key themes that were  
21 discussed or emerged from focus group discussions were reframed as survey questions;  
22 in a number of cases answer options in the survey were informed by focus group  
23 discussions (e.g. the different types of residual HBS participants were presented with  
24 were raised by focus group participants). The survey was carried out by the market  
25 research company Research Now using their online panel community of UK residents. A  
26 stratified sampling method was used: quotas were set on sex, age, geographical  
27 location, SEG and ethnicity, in line with data provided by the Office of National Statistics  
28 (ONS) to ensure the sample was as representative of the UK population as possible.  
29 Within each category, a random sample was selected from the Research Now database  
30 containing 451,185 active respondents. We aimed to recruit 1,000 responders in total. In  
31 order to reduce any on-line bias in our sample, 100 face-to-face interviews with non-  
32 internet users were conducted. An additional 'boost' sample of 100 people (not included  
33 in the main sample analysis) was also conducted with people from three minority ethnic  
34 groups ('Black', 'Chinese', 'S. Asian') so that we could conduct sub-group analysis  
35 between the groups. The main survey was then conducted in September 2012. Survey  
36 participants were not given the background information sheet about the use of  
37 biosamples in research which was given to all focus group participants. This was so that  
38 the survey responses represented the attitudes of the general public as far as possible.  
39 They were, however, given information during the survey to enable them to make  
40 informed decisions when answering the survey questions.  
41  
42  
43  
44  
45  
46  
47  
48  
49  
50  
51

## 52 **RESULTS**

### 53 **Study population**

54  
55  
56 Participant characteristics are detailed in Table 1.  
57  
58  
59  
60

Table 1: Participant characteristics

| Characteristic              | Focus group<br>N=81 | Survey<br>N=1110 |
|-----------------------------|---------------------|------------------|
| <b>Gender</b>               |                     |                  |
| Male                        | 33; 41%             | 504; 45%         |
| Female                      | 48; 59%             | 606; 55%         |
| <b>Age</b>                  |                     |                  |
| 18-24                       | 13; 16%             | 135; 12%         |
| 25-34                       | 18; 22%             | 184; 17%         |
| 35-44                       | 19; 23%             | 198; 18%         |
| 45-54                       | 10; 12%             | 184; 17%         |
| 55-64                       | 16; 20%             | 176; 16%         |
| 65+                         | 5; 6%               | 233; 21%         |
| <b>Socio-economic group</b> |                     |                  |
| A                           | 9; 11%              | 41; 4%           |
| B                           | 22; 27%             | 215; 19%         |
| C1                          | 24; 30%             | 311; 28%         |
| C2                          | 14; 17%             | 233; 21%         |
| D                           | 6; 7%               | 145; 13%         |
| E                           | 6; 7%               | 165; 15%         |
| <b>Region</b>               |                     |                  |
| East of England             | 7; 7%               | 92; 8%           |
| East Midlands               | -                   | 57; 5%           |
| London                      | 18; 22%             | 213; 19%         |
| North East                  | -                   | 40; 4%           |
| North West                  | -                   | 121; 11%         |
| Northern Ireland            | -                   | 30; 3%           |
| Scotland                    | 14; 17%             | 76; 7%           |
| South East                  | 14; 17%             | 165; 15%         |
| South West                  | -                   | 81; 7%           |
| Wales                       | -                   | 51; 5%           |
| West Midlands               | 14; 17%             | 94; 8%           |
| Yorkshire/Humberlands       | 14; 17%             | 90; 8%           |
| <b>Ethnicity</b>            |                     |                  |
| White or White British      | 54; 67%             | 1057; 95%        |
| Mixed race                  | 1; 1%               | 7; 1%            |
| Asian or Asian British      | 10; 12%             | 18; 2%           |
| Black or Black British      | 9; 11%              | 19; 2%           |
| Chinese or Chinese British  | 7; 9%               | 2; 0%            |
| Other ethnic group          | 0; 0%               | 4; 0%            |
| Prefer not to say           | 0; 0%               | 3; 0%            |
| <b>Religion</b>             |                     |                  |
| Christianity                |                     | 677; 61%         |
| Islam                       |                     | 13; 1%           |
| Hinduism                    |                     | 6; 1%            |
| Sikhism                     |                     | 0; 0%            |
| Judaism                     |                     | 6; 1%            |
| Buddhism                    |                     | 11; 1%           |
| Other religion              |                     | 15; 1%           |
| No religion                 |                     | 370; 33%         |
| Prefer not to say           |                     | 12; 1%           |
| <b>Religiosity</b>          |                     |                  |
| Not at all religious        |                     | 234; 32%         |
| Moderately religious        |                     | 422; 58%         |
| Very religious              |                     | 64; 9%           |



|                                                                                 |         |          |
|---------------------------------------------------------------------------------|---------|----------|
| Prefer not to say                                                               |         | 8; 1%    |
| <b>Education</b>                                                                |         |          |
| No formal qualification                                                         | 15; 19% | 70; 6%   |
| GCSE, O level, Scottish Standard Grade or equivalent                            | 19; 23% | 264; 24% |
| GCE, A-level, Scottish Higher or similar                                        | 17; 21% | 214; 19% |
| Vocational (BTEC/NVQ/Diploma)                                                   | -       | 230; 21% |
| Degree level or above                                                           | 30; 37% | 317; 29% |
| Prefer not to say                                                               | -       | 15; 1%   |
| <b>Self reported knowledge of medical research process</b>                      |         |          |
| No knowledge                                                                    |         | 463; 42% |
| Some knowledge                                                                  |         | 603; 54% |
| Good knowledge                                                                  |         | 44; 4%   |
| <b>Have you been affected by a disability or illness?</b>                       |         |          |
| Yes                                                                             |         | 399; 36% |
| No                                                                              |         | 711; 64% |
| <b>Has a close family member been affected by a disability or illness?</b>      |         |          |
| Yes                                                                             |         | 767; 69% |
| No                                                                              |         | 343; 31% |
| <b>Have you had blood or tissue removed during a medical procedure?</b>         |         |          |
| Yes                                                                             |         | 446; 40% |
| No                                                                              |         | 553; 50% |
| Don't know                                                                      |         | 111; 10% |
| <b>Have you ever been asked to donate blood or tissue for medical research?</b> |         |          |
| Yes                                                                             |         | 182; 16% |
| No                                                                              |         | 904; 81% |
| Don't know                                                                      |         | 24; 2%   |
| <b>If so, did you agree to donate?</b>                                          |         |          |
| Yes                                                                             |         | 155; 85% |
| No                                                                              |         | 23; 13%  |
| Don't know                                                                      |         | 4; 2%    |

### Focus groups

One hundred and eighty-two members of the public who were approached were eligible and 81 people agreed to participate (45% response rate; 48 women, 33 men).

### Survey

Four thousand six hundred and seven people were invited to take part in the survey; 2014 did not respond, 860 began completing the survey but did not finish, 102 did not qualify to continue, 521 qualified for the survey but the quota was full and 1110 completed the questionnaire (28% response rate excluding those who did not qualify and where the quota was full). This response rate is comparable to similar studies on this topic[6]. Our quota sample was close to but not exactly matching our set targets.

1  
2  
3 For this reason we carried out both weighted and unweighted analyses. There was no  
4 difference in the conclusions we reached by either method. In this paper we present the  
5 unweighted results (weighted results can be found at supplementary files: Appendix IV).  
6  
7

### 8 **Interest in being asked to donate**

9

10 We began by providing a brief description of the use of HBS in biomedical research and  
11 then asked survey participants whether, in general, they wanted to be asked to donate.  
12 Three quarters (75%) of survey participants wanted to be asked (29% definitely yes,  
13 46% probably yes); 18% didn't want to (14% probably not and 4% definitely not); and  
14 7% didn't know. When asked how important they thought it was to donate HBS for  
15 biomedical research, 87% said either extremely important (50%) or important (37%).  
16 Less than 1% of participants (n=5) thought it was not at all important.  
17  
18  
19

20  
21 Respondents who wanted to be asked to donate HBS were significantly more likely to be:  
22 either not religious or only moderately so (where they did have a religious affiliation)  
23 (79.7% vs. 59.7%,  $X^2=36.56(1)$ ,  $p=0.001$ ); from higher SEG groups (A-D vs. E)(83.8%  
24 vs. 62.2%,  $X^2=36.55(1)$   $p<0.001$ ); had tissue removed during a medical or surgical  
25 procedure (87.2% vs. 73.1%,  $X^2=27.13(1)$ ,  $p<0.001$ ); had some or good knowledge of  
26 the medical research process (84.4% vs. 75.1%,  $X^2=13.04(1)$ ,  $p<0.001$ ); were under  
27 55 years (84% vs. 75.1%,  $X^2=11.56(1)$ ,  $p=0.001$ ); were 'White' (81.7% vs. 60.9%,  
28  $X^2=10.9(1)$ ,  $p=0.001$ ); have no religious affiliation (86.4% vs. 77.9%,  $X^2=9.9(1)$   
29  $p=0.002$ ); and had an education level of A level or equivalent or higher (83.4% vs.  
30 76.1%,  $X^2=7.18(1)$ ,  $p=0.007$ ). Using the boost sample for ethnic minorities we found  
31 that 'Black' participants were significantly less likely to want to be asked to donate than  
32 'White' participants (53.3% vs. 81.7%,  $X^2=20.12(1)$ ,  $p<0.001$ ). Participants who had a  
33 close family member affected by a condition were more willing to be asked to donate  
34 than those who hadn't, although the difference was not quite statistically significant  
35 (70.7% vs. 63.3%,  $X^2=3.8(1)$ ,  $p=0.051$ ).  
36  
37  
38  
39  
40  
41  
42  
43

44 Four independent variables were found to have a significant impact on participants'  
45 interest in being asked to donate tissue as shown in the logistic regression model in  
46 Table 2. The strongest predictor for wanting to be asked to donate was being from a  
47 higher socio-economic group (A-D vs. E) (OR=3.52, 95% CI 2.19-5.66,  $p<0.001$ )  
48 followed by having had tissue removed during a medical or surgical procedure  
49 (OR=2.51, 95% CI 1.65-3.84,  $p=0.001$ ), being either not at all or only moderately  
50 religious (OR=2.42, 95% CI 1.31-4.47,  $p=0.005$ ), and having self-reported some or  
51 good knowledge of the medical research process (OR=2.01, 95% CI 1.33-3.03,  
52  $p=0.001$ ).  
53  
54  
55  
56  
57  
58  
59  
60

Table 2. Multiple logistic regression examining participant willingness to donate tissue

| Participant characteristic            | Coefficient | 95% CI     | Odds ratio | p value |
|---------------------------------------|-------------|------------|------------|---------|
| Socio-economic group                  | 1.26        | 2.19, 5.66 | 3.52       | <0.001  |
| Religiosity                           | 0.89        | 1.31, 4.47 | 2.42       | 0.005   |
| Knowledge of medical research process | 0.70        | 1.33, 3.03 | 2.01       | 0.001   |
| Had tissue removed                    | 0.99        | 1.65, 3.84 | 2.51       | <0.001  |

Demographic items were excluded from this table if they were not statistically significant. All variables were entered into the models as categorical variables.  
CI: Confidence Interval.

Focus group participants also showed a strong willingness to donate HBS for biomedical research. Four key reasons were provide by participants. First, it was a good way of reciprocating for medical treatment received in the past, second, it was viewed as an "important way of developing drugs and treatments", and third, that residual tissue, which participants did not have any strong emotional ties to, would otherwise go to waste. The fourth reason offered was one of personal benefit whereby participants themselves or a family member was affected by an illness or disease.

*"Someone in my family has got Alzheimer's so I'm particularly supportive"* (Female, 18-24 focus group)

A minority of focus group participants did raise concerns. These included surgeons taking "liberties or advantage of the fact that you're out cold", concerns about data privacy and mistrust of profit-making companies using donated HBS or the government regulating their use.

*"The world's very corrupt, and if something needs to get pushed through, it gets pushed through."* Female, 'Black' focus group

Whilst interest in donating appeared to be high, it was evident that knowledge of the medical research process was low. In the survey only 4% of respondents self-reported to have a 'good knowledge' of the research process; 54% said they had 'some knowledge' and 42% said they had 'no knowledge'. Similarly, a number of focus group participants commented that the information leaflet was the first time they had heard anything about the use of donated HBS in medical research.

## **Types of HBS**

### ***Residual HBS***

The majority of survey participants were either definitely or probably willing to donate residual blood (92%); cancerous tissue (90%); fat (89%); skin tissue (88%); bone or cartilage (84%); and liver tissue (84%) following a medical procedure (Figure 1). Less

1  
2  
3 than half of participants were willing to donate spare eggs (women only) (48%) or spare  
4 embryos (44%) left over following in vitro fertilisation (IVF).  
5  
6  
7  
8

9 Note: percentages may not add up to 100% due to rounding.

10 Chi-square was conducted to examine effects of participant characteristics on willingness to donate spare eggs  
11 and spare embryos as these two tissue types caused most divide amongst participants. Willingness to donating  
12 spare embryos was significantly associated with being: male (55.9% vs. 48.3%,  $X^2=4.87(1)$ ,  $p=0.023$ ); under  
13 55 years (55.1% vs. 45.3%,  $X^2=7.55(1)$ ,  $p=0.005$ ); from a higher (A-D) socio-economic group (54.9% vs.  
14 32%,  $X^2=22.05(1)$ ,  $p<0.001$ ); White ethnicity (53% vs. 27.7%,  $X^2=10.48(1)$ ,  $p=0.001$ ), having a religious  
15 affiliation (63.5% vs. 45.9%,  $X^2=24.13(1)$ ,  $p<0.001$ ), being not at all or moderately religious where they did  
16 have a religious affiliation (48.1% vs. 25.5%,  $X^2=9.38(1)$ ,  $p=0.002$ ); and had had tissue removed during a  
17 medical procedure (56.9% vs. 46%,  $X^2=9.41(1)$ ,  $p=0.002$ ). Women who were willing to donate spare eggs  
18 were significantly more likely to be: from a higher socio-economic group (A-D) (58.5% vs. 44.7%,  $X^2=4.45(1)$ ,  
19  $p=0.035$ ); White ethnicity (58.1% vs. 17.4%,  $X^2=13.21(1)$ ,  $p<0.001$ ); have no religious affiliation (71.5% vs.  
20 50.4%,  $X^2=18.47(1)$ ,  $p<0.001$ ); be not at all or moderately religious where they did have a religious affiliation  
21 (53.5% vs. 23.7%,  $X^2=10.88(1)$ ,  $p=0.001$ ); and had had tissue removed during a medical procedure (62.8%  
22 vs. 50.4%,  $X^2=6.77(1)$ ,  $p=0.009$ ).  
23

24 These results confirm our focus group findings, where most people were willing to  
25 donate residual tissue but donation of reproductive tissue raised concerns for a  
26 significant number of participants. A key concern was that reproductive tissue would be  
27 used for reproductive purposes without the knowledge of the donor.  
28

29 *"Although they said it's [ethical approval process] very strict, I still in the back of my*  
30 *mind have a thing where someone could take my egg and have my child"* Female, had  
31 operation in past two years  
32

33 A further concern related to whether it was 'right' from an ethical or religious  
34 perspective, to be conducting research on reproductive tissue.  
35

36 *"I would be really worried...an embryo is a baby. I know it's still very, very early days,*  
37 *but you're playing God."* Female – patient affected by a condition  
38

39 Those people who were willing to donate reproductive tissue underscored the benefits  
40 that could result from such research.  
41

42 *"You have to remove yourself from the situation and imagine yourself as an infertile*  
43 *person and maybe someone that could benefit immensely from that research."* Female –  
44 18-24 focus group  
45

46 Some did, however, highlight the importance of being informed as to how reproductive  
47 tissue would be used because of its sensitive nature.  
48

#### 49 **'Healthy' volunteers**

50 Survey participants were then presented with a scenario in which they were asked to  
51 imagine that they are in a hospital waiting room awaiting an appointment and are asked  
52  
53  
54

whether they would donate certain types of HBS specifically for the purposes of medical research (Figure 2). Most responders were either definitely or probably willing to donate urine (89%), saliva (89%) and blood (81%), however, fewer people would donate tissue taken during a local anaesthetic (67%) or sperm (men only) (58%).

Note: percentages may not add up to 100% due to rounding.

Chi-square was conducted to examine effects of participant characteristics on willingness to donate tissue requiring a local anaesthetic and sperm as these two tissue types caused most divide amongst participants. Willingness to donate tissue requiring a local anaesthetic was significantly associated with: being over 25 years (72.9% vs. 59.3%,  $X^2=9(1)$ ,  $p=0.003$ ); from a higher socio-economic group (A-D) (73.1% vs. 60.9%,  $X^2=9.03(1)$ ;  $p=0.003$ ), White ethnicity (72.3% vs. 48.9%,  $X^2=10.87(1)$ ,  $p=0.001$ ); being not at all or moderately religious where they had a religious affiliation (71.4% vs. 49.2%,  $X^2= 11.53(1)$ ,  $p=0.001$ ); having good knowledge of the medical research process (75.8% vs. 64.5%,  $X^2=14.96(1)$ ,  $p=0.001$ ), had had tissue removed during a medical procedure (77.9% vs. 64%,  $X^2=20.77(1)$ ,  $p<0.001$ ), and had agreed to donate left over tissue (82.8% vs. 45.5%,  $X^2=13.51(1)$ ,  $p<0.001$ ). Men who were willing to donate sperm were significantly more likely to be: from a higher socio-economic group (A-D) (66.8% vs. 42%,  $X^2=14.47(1)$ ,  $p<0.001$ ); White ethnicity (65.8% vs. 22.2%,  $X^2=18.95(1)$ ,  $p<0.001$ ), and be either not at all or moderately religious where they did have a religious affiliation (64.3% vs. 36.4%,  $X^2=5.61(1)$ ,  $p=0.018$ ).

Focus group participants were also generally positive towards donating HBS specifically for research purposes, although some commented that they would not want to undergo an invasive procedure.

*"Depends on what they wanted, if it's not invasive or nothing then I'd say yes."* Female – 'Black' focus group

A number said they would be more likely to donate HBS if they did not have to travel somewhere specifically to do so. Focus group participants also appeared to want more information about how their sample would be used if they were donating HBS as 'healthy' volunteers.

*"I'd want to know the purpose behind it but if I'm helping something then why not?"* Male – 'Chinese' focus group

### **Additional HBS during surgery**

Finally, survey participants were presented with a scenario in which they are having surgery which requires a general anaesthetic, and asked whether they would be willing to have additional tissue taken not required to be removed for therapeutic benefit. Over three quarters of responders (78%) were willing to donate HBS taken from the same part of the body being operated on, 63% were willing to donate HBS taken from an area close by, and 44% would donate HBS involving an additional procedure e.g. taking bone marrow whilst under the same general anaesthetic.

1  
2  
3 This scenario was not explored explicitly with focus group participants, but was included  
4 in the survey as a number had aired concerns about surgeons taking additional tissue  
5 during surgery without consent.  
6

7  
8 *"I would be worried about giving consent before they performed an operation in case the*  
9 *main task of the operation is to remove cancer...and they take some tissue for research.*  
10 *I think it would be OK but only if they asked."* Male, 18-24 group  
11

### 12 **Donation of HBS in the event of one's death**

13  
14 We explored whether the public were willing to donate tissue and whole organs in the  
15 event of their death. First, we compared survey responders' views concerning the  
16 donation of tissue taken from an organ compared to donating a whole organ using the  
17 liver and brain as examples. We found that tissue type had a greater impact on people's  
18 willingness to donate than amount of tissue: 89% of people were willing to donate liver  
19 tissue; 68% a whole liver; 66% brain tissue; 53% a whole brain. On presenting  
20 participants with a list of organs and asking them whether there were any whole organs  
21 they would not consider donating for medical research in the event of their death, 71%  
22 would not donate their brain, 65% would not donate their eyes, 27% would not donate  
23 their heart, 14% would not donate their liver; 14% would not donate their lungs and  
24 13% would not donate their kidneys. Five people (0.5%) said they would not donate  
25 reproductive tissue in the free text box. Seventeen percent would not donate any organs  
26 for medical research.  
27

28  
29 Donating whole organs for medical research in the event of one's death caused unease  
30 for a number of focus group participants. Some had concerns about the impact on family  
31 members, citing that it was a "sensitive subject" that may make them feel  
32 "uncomfortable". A woman in the South Asian group cited religious reasons for not  
33 wanting to donate organs. Others didn't like the idea of their body being "chopped up  
34 like on a butcher's board" and preferred "to remain whole" and "untouched". A few  
35 participants erroneously believed that their organs would not be useful to researchers  
36 because they were old or unhealthy. When focusing on particular organs, eyes were  
37 found to be most contentious and made participants feel "funny" or "squeamish". They  
38 also had concerns that eyes were "identifiable".  
39

40  
41 When asked whether they would be willing to donate whole organs not suitable for  
42 transplant for research purposes instead, 68% of survey responders said they would,  
43 11% would prefer they were not used at all if they couldn't be used for transplant, 9%  
44 would not agree to donate an organ for transplant and 12% didn't know.  
45

### 46 **Uses of HBS**

1  
2  
3 The most controversial types of research were research involving HBS in combination  
4 with animals (only 34% of survey participants would donate for this purpose), research  
5 conducted outside the UK (35%), and research involving 'cells from embryos' (41%)  
6 (Figure 3). Research into understanding how our body fights disease was the least  
7 controversial (85%).  
8  
9

10  
11  
12  
13 Note: percentages may not add up to 100% due to rounding.

14 Chi-square was conducted to examine effects of participant characteristics on willingness to donate samples for  
15 research outside the UK and research involving animals as these two research types had least support. Those  
16 participants who were less willing to donate samples for research outside the UK were significantly more likely  
17 to be: over 55 years (67.8% vs. 53.8% ,  $X^2=17.2(1)$ ,  $P=0.001$ ); from a low socio-economic group (E) (72.8%  
18 vs. 56.6%,  $X^2=11.92(1)$ ,  $p=0.001$ ); non-white ethnicity (78% vs. 58%,  $X^2=5.7(1)$ ,  $p=0.017$ ); have a religious  
19 affiliation (63.4% vs. 49.8%,  $X^2=14.83(1)$ ,  $p=0.001$ ); have a lower education level (GCSE or equivalent or  
20 lower) (65.9% vs. 55.5%,  $X^2=8.18(1)$ ,  $p=0.004$ ); and had not had tissue removed during a medical procedure  
21 (62.5% vs. 55%,  $X^2=4.57(1)$ ,  $p=0.033$ ). Those participants who were less willingness to donate samples for  
22 research involving animals were significantly more likely to be: female (69.5% vs. 51.8%,  $X^2=30.74(1)$ ,  
23  $p<0.001$ ); from a low socio-economic group (E) (78% vs. 58.4%,  $X^2=19.9(1)$ ,  $p<0.001$ ); non-white ethnicity  
24 (80% vs. 60.5%,  $X^2=6.09(1)$ ,  $p=0.014$ ); have a religious affiliation (63.6% vs. 56.7%,  $X^2=4.02(1)$ ,  $p=0.045$ );  
25 be very religious whereby they did have a religious affiliation (78.7% vs. 61.9%,  $X^2=5.99(1)$ ,  $p=0.014$ ); have  
26 no knowledge of the medical research process (67.6% vs. 57.1%,  $X^2=10.4(1)$ ;  $p=0.001$ ) and had not agreed  
27 to donate leftover tissue for medical research (81% vs. 49.3%,  $X^2=6.12(1)$ ,  $p=0.013$ ).  
28

29 Research involving animals was cited as a cause for concern by a number of focus group  
30 participants, particularly if the research caused the animals "excessive pain". Others had  
31 concerns about the way animals were cared for in research settings. Nevertheless, a  
32 view held by a significant number of people was that research and drugs tested on  
33 animals was "not a nice thought...but in the long run the best option" and that "the  
34 information gained from watching [an animal used in research] might help thousands of  
35 people".  
36

37  
38 Research conducted outside the UK was a concern for some focus group participants  
39 because other countries might not have similarly strict governance arrangements as  
40 those that exist in the UK, or because HBS might be sold. Other types of research cited  
41 as being controversial included cloning, stem cell research, genetic engineering and  
42 "designer babies".  
43  
44

#### 45 46 **Access to HBS**

47  
48 Most survey responders were willing to donate HBS to NHS hospitals (84%), medical  
49 research charities (79%), universities (68%), diagnostic companies (63%) and  
50 pharmaceutical companies (56%) (Figure 4).  
51  
52

53  
54  
55 Note: percentages may not add up to 100% due to rounding.

56 Chi-square was conducted to examine effects of participant characteristics on willingness to donate samples for  
57 pharmaceutical companies as this organisation had the least support. Those participants who were less willing  
58  
59  
60

1  
2  
3 to donate samples to pharmaceutical companies were significantly more likely to be: over 55 years (39.4% vs.  
4 31.3%,  $X^2=6.16(1)$ ,  $p=0.013$ ); from a low socio-economic group (E) (43.4% vs. 32.6%,  $X^2=5.91(1)$ ;  
5  $p=0.015$ ), non-white ethnicity (60.9% vs. 32.9%,  $X^2=14(1)$ ,  $p=0.001$ ); live in London (45.1% vs. 31.7%,  
6  $X^2=11.02(1)$ ,  $p=0.001$ ); have a religious affiliation (38.1% vs. 26.9%(1),  $X^2=11.1(1)$ ,  $p=0.001$ ); be very  
7 religious whereby they had a religious affiliation (54.5% vs. 36.7%,  $X^2=6(1)$ ,  $p=0.014$ ); have no knowledge of  
8 the medical research process (38.3% vs. 31.6%,  $X^2=4.14(1)$ ,  $p=0.042$ ); and had not had tissue removed  
9 during a medical procedure (38% vs. 29.8%,  $X^2=6(1)$ ,  $p=0.014$ ).

10  
11 Focus group discussions highlighted that there was generally a high level of faith in the  
12 benefits of science, and trust towards the NHS, charities and universities, who were seen  
13 as contributing positively towards society. The role of ethics review boards and legal  
14 systems in providing oversight and control of medical research was considered  
15 important, nevertheless, it was acknowledged that most people are unaware of these  
16 safeguards.

17  
18  
19  
20  
21 *"I do now know something about the process, and like the ethics side and presenting to  
22 a board, but before I wouldn't have known anything about the research process. So I  
23 guess I'm just thinking, how would I feel if I didn't know about those procedures?"*

24  
25 Female – pilot group

26  
27 Some initial negativity was found in relation to pharmaceutical companies conducting  
28 research because of their commercial, profit-making nature and concerns that they  
29 "exploit patients". However, such concerns were often addressed by other members of  
30 the group who acknowledged that commercialisation of research was "a fact of life" and  
31 that pharmaceutical companies "need to make money to keep their research going".

### 32 33 34 35 **Medical records and lifestyle information**

36  
37 We asked participants whether they would be willing to have medical records and  
38 lifestyle information linked but de-identified (so that the sample is anonymous to the  
39 researcher but contains codes that would allow others to identify an individual from it) to  
40 their biosample. Sixty eight percent of survey responders would, 22% would not and  
41 10% didn't know. Survey responders were more willing to have their de-identified  
42 lifestyle information linked to their biosample; 82% would, 12% would not, and 6%  
43 didn't know.

44  
45  
46  
47  
48 Concerns about linking medical records with HBS were raised by focus group  
49 participants. Data protection and privacy were two key concerns, for example,  
50 participants were worried that their personal data might be "hacked or mislaid". Others  
51 cited concerns about data being accessed by the police or insurance companies. Some  
52 participants felt uncomfortable about sensitive medical details such as sexual diseases or  
53 illegal drug use being seen by people unconnected with their health. Nevertheless, most  
54  
55  
56  
57  
58  
59  
60



1  
2  
3 participants understood the importance of linking medical records and lifestyle  
4 information to HBS as long as they were not identifiable.  
5

6  
7 *"You want the sample to be as useful as possible so you want to give them the most*  
8 *complete picture. You want to give them all the information that is available."* Male – had  
9 operation in past two years.  
10

## 11 **DISCUSSION**

12  
13  
14 Results from this study are consistent with the findings from other empirical research  
15 that there is a high level of public support for biomedical research and willingness to  
16 donate HBS for this purpose[3-5,7,16-18]. However, by presenting participants with  
17 scenarios consisting of a variety of HBS types across a number of settings, and by using  
18 both qualitative and quantitative methods, we have been able to build a richer  
19 understanding of public attitudes. Whilst it is important to bear in mind that the opinions  
20 expressed are hypothetical and therefore do not necessarily correspond with how people  
21 would actually behave in practice, they still offer an intriguing insight into public  
22 attitudes which can help inform policy and practice.  
23  
24  
25  
26  
27

28 The general willingness of the UK public to donate residual HBS is consistent with  
29 findings from other studies conducted in the UK, USA and Scandinavia where willingness  
30 to donate varied from 67%-88%[3-5,7,16,17]. Interestingly, people who themselves  
31 had had tissue removed were significantly more likely to want to be asked to donate  
32 than those that hadn't (87% compared to 73%). A number of other studies conducted in  
33 the UK and elsewhere have found patient willingness to be high, between 83%-99%[19-  
34 24]. This is likely to be because donation of surplus tissue provides patients with an  
35 opportunity to reciprocate or demonstrate gratitude towards those involved in the  
36 therapeutic process[21] or because they have had the medical need explained to them  
37 and can relate to the experience more closely. Those responders who self-reported  
38 having some or good knowledge of the medical research process were also significantly  
39 more likely to want to be asked to donate. This finding supports the need for public  
40 education to improve understanding of the research process and the contribution HBS  
41 make to this. We identified that more people saw biosample donation as important  
42 (87%) than wanted to be asked to donate (75%). It may be that although people see  
43 donation as important, other concerns e.g. around issues such as data privacy, or other  
44 ethical considerations such as commercial use of HBS may prevent some people from  
45 donating; concerns have been identified in this and other empirical studies[5,15,19,25].  
46  
47  
48  
49  
50  
51  
52  
53  
54

55 Lower levels of support for HBS donation were identified amongst minority ethnic  
56 groups, a finding that has been seen elsewhere, particularly amongst African-  
57  
58  
59  
60

1  
2  
3 Americans[18,26-28] and Asian-American women[29]. A study conducted in China also  
4 found that public and patient willingness to donate residual tissue was low compared to  
5 studies conducted in the UK, Scandinavia and the USA, at only 65%[30]. These  
6 differences may stem from different cultural attitudes towards donation, religious beliefs  
7 or low levels of trust in public institutions (which may stem from previous breaches of  
8 trust as highlighted by Ma et al.[30] amongst the 'Chinese' population). Mistrust of  
9 profit-making companies and the government were identified during focus group  
10 discussions with ethnic minority groups in this study, although not exclusively so.  
11 Information about the role of ethics review boards in safeguarding participants' interests  
12 is therefore vital for ensuring public trust.  
13  
14  
15  
16  
17

18 A large proportion of people were unwilling to donate reproductive tissue. This type of  
19 HBS donation raised a number of unique moral, ethical and social concerns, as  
20 exemplified by focus group discussions. Interestingly, the survey showed that men were  
21 more likely to donate semen than women were excess eggs following an IVF procedure  
22 (58% v 48%), which may indicate egg donation is a more contentious issue or that  
23 women feel a greater attachment to eggs than men to sperm[31]. Another possible  
24 reason may be the limited number of eggs that a woman has, and the greater effort and  
25 risk required to make them available *ex vivo*, resulting in a more judicious approach to  
26 their use; for example, women may prefer to keep excess eggs following IVF for future  
27 uses rather than donate them for research. More controlled forms of consent (tiered or  
28 specific) may be one way of alleviating concerns people may have about donating  
29 sensitive HBS.  
30  
31  
32  
33  
34  
35

36 When asked to consider post-mortem donation, eyes and brains were considered the  
37 least desirable organs to donate for research purposes, a finding that has been reported  
38 elsewhere[7]. As the donation of eyes is crucial for vision research and drug testing, and  
39 with donated brains being essential for research into conditions such as multiple  
40 sclerosis, Alzheimer's and Parkinson's disease, different ways of raising awareness and  
41 motivating donation need to be considered. For example, completely transparent  
42 discussion with families on the day prior to forensic post-mortem examination,  
43 conducted in a sensitive manner, has led to research authorisation and donation in a  
44 very high proportion of cases to the Sudden Death Brain and Tissue Bank in  
45 Edinburgh[32]. It may also be worth considering incentives to donation for research, as  
46 have already been discussed in depth elsewhere, although with a greater emphasis on  
47 donation for transplant[33]. Our research highlights that a significant number of people  
48 (68%) would be willing to donate whole organs not suitable for transplant for research  
49 purposes instead. Such soft incentives are likely to be welcomed by families, a finding  
50  
51  
52  
53  
54  
55  
56  
57  
58  
59  
60

1  
2  
3 which has also been reported by Womack et al.[34] where over 70% of family members  
4 consented for the retrieval of blood and tissue at the time of post-mortem examination.  
5

6  
7 The finding that 67% of people were willing to undergo a local anaesthetic to donate  
8 tissue seems unusually high at first glance. Nevertheless, such a finding should not be  
9 dismissed; women have been known to undergo local aesthetic to donate healthy breast  
10 tissue for breast cancer research, as evidenced by the 2800 women who have donated to  
11 the Komen Tissue Bank in the United States[35]. The finding that a significant proportion  
12 of the public are willing to donate as 'healthy volunteers' also supports the premise that  
13 there is a strong altruistic desire to contribute to medical research and a high level of  
14 trust in and support for the research process[8].  
15  
16  
17  
18

19 Research involving animals and research conducted outside the UK were the least  
20 supported research types in this study. Animal research remains a controversial topic  
21 and much empirical and ethical debate has focused on this issue[36-38]. However, the  
22 finding that a large proportion of the public do not want their HBS used for research  
23 outside the UK is intriguing. Our qualitative data show that concerns exist around  
24 regulation and commodification of HBS, findings supported elsewhere in the  
25 literature[39,40]. To address these concerns, potential donors should be provided with  
26 information related to the specific issues that relate to those countries where HBS are  
27 likely to be sent.  
28  
29  
30  
31  
32

33 Regarding access to donated HBS, overall findings indicate high levels of trust towards  
34 research organisations conducting biomedical research. Lowest trust was afforded to  
35 pharmaceutical companies, primarily because of their profit-making nature, a finding  
36 which concurs with other studies[5,10,11]. Greater transparency and education of the  
37 public by the research community about the role pharmaceutical companies play in  
38 research and drug development (as is currently being conducted through initiatives such  
39 as EUPATI; [www.patientsacademy.eu](http://www.patientsacademy.eu)), will help to highlight the collaborations that  
40 frequently exist between private and public enterprises. Emphasising the safeguards that  
41 exist in research through regulation and ethics review boards is also likely to alleviate  
42 some of these concerns.  
43  
44  
45  
46  
47  
48

49 Finally, our research reinforces the concerns held by the public regarding the linking of  
50 de-identified clinical data to HBS[19,25]. Discussion during the consent procedure  
51 around the value of associated clinical data, and the safeguards in place to ensure data  
52 security, may go some way to reducing these worries. Similarly, the strict governance  
53 arrangements around access to personal information by third parties including the police,  
54 insurance companies and employers should be made clear.  
55  
56  
57  
58  
59  
60

### Strengths and Limitations

As with any qualitative research, the findings from this study rely on the researcher's interpretation of comments made by focus group participants. Nevertheless, we have used a methodology grounded in the data and ensured inter-rater reliability through cross-checking coding to ensure the interpretation was as close to the intended meaning as possible. Moreover, we have been able to verify focus group findings through the results from the survey. A major limitation of this study is its hypothetical nature; hence the results need to be interpreted with caution. Nevertheless, where possible, we presented questions as scenarios to try and make them as 'real' as possible. We also provided focus group participants with a background information sheet so that they had some knowledge about the subject matter before the discussion took place, and as such were likely to be more well informed than the general public. Survey participants were not given this information sheet and were only given selective background information that it was felt (by the authors) was necessary to enable them to make informed decision when answering the questions. This in itself, however, may have impacted the representativeness of the findings as they may have responded differently if no background information had been provided. A further limitation is that the dropout rate was relatively high; participants that did complete the survey may have done so because of a strong attachment to the issues raised and this may have skewed the results. However, every effort was made to ensure that the results were as representative of the UK population as possible. Finally, the focus groups and survey were conducted in English which excluded those people who were not competent English speakers and/or readers. Our findings are therefore not necessarily representative of the non-English speaking community living in the UK.

### CONCLUSION

There is a high level of public support for, and willingness to contribute to biobanking and the research process. In particular, people appear keen to contribute to research above and beyond the donation of residual tissue. Nevertheless, underlying concerns exist regarding the use of certain types of HBS, the conditions under which they are used and data security, although these issues did not necessarily preclude willingness to participate. Improved public education in these areas, for example, through the development of a 'Frequently Asked Questions' document which includes information on the ethics infrastructure that exists in the UK may mitigate some of these concerns. More controlled forms of consent and focused communication for sensitive types of HBS may also positively impact public willingness to donate infrequently donated tissue

1  
2  
3 types. More focused communication may also address the finding that certain sub-  
4 groups, such as particular minority ethnic groups, are less likely to donate. Finally,  
5 greater transparency in the biomedical research process and the fostering of trust in  
6 those organisations involved throughout that process is vital to ensure the process of  
7 donating tissue to biobanks is satisfactory to all parties involved. These suggestions  
8 should be considered by the research community and policy makers.  
9  
10  
11

12  
13  
14  
15 **Acknowledgements** We would like to thank Lisa Bennett, Sarah Dickson, Catherine  
16 Elliott, James Ironside and Chris Womack and for their helpful comments on this paper;  
17 Sarah Dickson, Jim Elliott and Neil Formstone for their contribution to the design of the  
18 study; and Samantha Reeve and Zheng Lei for help with data analysis.  
19

20  
21  
22 **Funding statement** This work was supported by a grant from the Technology Strategy  
23 Board through the Stratified Medicines Competition grant number 101021, direct  
24 financial contributions by AstraZeneca and resource in kind by AstraZeneca,  
25 GlaxoSmithKline and Lab 21.  
26  
27

28 **Competing interests:** Lesley Stubbins is an employee of GlaxoSmithKline. Mark  
29 Robertson is an employee of AstraZeneca.  
30  
31

32 **Contributors:** J.C. conceived the study. All authors contributed to the study design. In  
33 addition to all the authors, Sarah Dickson, Jim Elliott and the late Neil Formstone also  
34 contributed towards the design of the study and development of the focus group and  
35 survey questions. C.L. facilitated the focus groups. Focus group recruitment was  
36 conducted by the company The Focus Group; the survey was conducted through the  
37 market research company Research Now. C.L. conducted data analysis and  
38 interpretation with the help of Samantha Reeve and Zheng Lei. The initial draft of the  
39 manuscript was prepared by C.L and then circulated repeatedly among the authors for  
40 critical revision. All authors approved the final manuscript.  
41  
42  
43  
44

45  
46 **Ethical approval** This study was approved by the Ethics Review Board of the University  
47 of Manchester, reference 11459.  
48

49  
50 **Data sharing statement** Transcripts from the focus groups and full results of the  
51 survey are available from CL at [celine@geneticalliance.org.uk](mailto:celine@geneticalliance.org.uk). Supplementary material is  
52 also available at [www.geneticalliance.org.uk/projects/stratum\\_docs.htm](http://www.geneticalliance.org.uk/projects/stratum_docs.htm)  
53  
54  
55  
56  
57  
58  
59  
60

### Figure legends

Figure 1 – Would you donate the the following types of samples for medical research if they were left over (after necessary medical tests had been done) following a medical procedure.

Figure 2 – Would you agree to donate the following type of samples for medical research, i.e. not as part of any medical procedure, but purely for the purposes of research?

Figure 3 – Would you be willing to donate samples for the following type of samples for research?

Figure 4 - Would you be willing to donate samples to the following organisations to carry out approved research?

### REFERENCES

1. Kaiser J. Biobanks. Population databases boom, from Iceland to the U.S. *Science* 2002;**298**:1158-61.
2. Tutton R, Kaye J, Hoeyer K. Governing UK Biobank: the importance of ensuring public trust. *Trends in biotechnology* 2004;**22**:284-5.
3. Kaufman D, Bollinger J, Dvoskin R, et al. Preferences for opt-in and opt-out enrollment and consent models in biobank research: a national survey of Veterans Administration patients. *Genetics in medicine : official journal of the American College of Medical Genetics* 2012;**14**:787-94.
4. Kettis-Lindblad Å, Ring L, Viberth E, et al. Genetic research and donation of tissue samples to biobanks. What do potential sample donors in the Swedish general public think? *The European Journal of Public Health* 2006;**16**:433-40.
5. Tupasela A, Sihvo S, Snell K, et al. Attitudes towards biomedical use of tissue sample collections, consent, and biobanks among Finns. *Scandinavian Journal of Public Health* 2010;**38**:46-52.
6. Simon CM, L'Heureux J, Murray JC, et al. Active choice but not too active: Public perspectives on biobank consent models. *Genetics in Medicine* 2011;**13**:821-31.
7. Goodson ML, Vernon BG. A study of public opinion on the use of tissue samples from living subjects for clinical research. *Journal of clinical pathology* 2004;**57**:135-38.
8. Morrell B, Lipworth W, Axler R, et al. Cancer as Rubbish: Donation of Tumor Tissue for Research. *Qualitative health research* 2011;**21**:75-84.
9. Barr M. I'm not Really Read up on Genetics': biobanks and the social context of informed consent. *BioSocieties* 2006;**1**:251-62.

10. Haddow G, Cunningham-Burley S, Bruce A, et al. Generation Scotland: consulting publics and specialists at an early stage in a genetic database's development. *Critical Public Health* 2008;**18**:139-49.
11. Budimir D, Polasek O, Marusic A, et al. Ethical aspects of human biobanks: a systematic review. *Croat Med J* 2011;**52**:262-79.
12. Lipworth W, Morrell B, Irvine R, et al. An empirical reappraisal of public trust in biobanking research: rethinking restrictive consent requirements. *Journal of law and medicine* 2009;**17**:119-32.
13. Kitzinger J. Focus groups. In: Pope C, Mays N, eds. *Qualitative research in health care*. 3rd ed. Oxford: Blackwell Publishing Ltd. , 2006.
14. Tutton R. Constructing participation in genetic databases. *Science, Technology & Human Values* 2007;**32**:172-95.
15. Haddow G, Bruce A, Sathanandam S, et al. 'Nothing is really safe': a focus group study on the processes of anonymizing and sharing of health data for research purposes. *Journal of evaluation in clinical practice* 2010;**17**:1140-6.
16. Kaufman DJ, Murphy-Bollinger J, Scott J, et al. Public Opinion about the Importance of Privacy in Biobank Research. *The American Journal of Human Genetics* 2009;**85**:643-54.
17. Ipsos MORI Social Research Institute. Human Tissue Authority General Public Survey. 2010 [http://www.hta.gov.uk/db/documents/2007-09-10\\_Ipsos\\_MORI\\_general\\_public\\_qual\\_and\\_quant\\_report\\_final\\_200709101952.pdf](http://www.hta.gov.uk/db/documents/2007-09-10_Ipsos_MORI_general_public_qual_and_quant_report_final_200709101952.pdf) Accessed 26 February 2013.
18. Chen DT, Rosenstein DL, Muthappan P, et al. Research with stored biological samples: what do research participants want? *Arch Intern Med* 2005;**165**:652-5.
19. Jack AL, Womack C. Why surgical patients do not donate tissue for commercial research: review of records. *BMJ* 2003;**327**:262.
20. Bryant RJ, Harrison RF, Start RD, et al. Ownership and uses of human tissue: what are the opinions of surgical in-patients? *Journal of clinical pathology* 2008;**61**:322-26.
21. Start RD, Brown W, Bryant RJ, et al. Ownership and uses of human tissue: Does the Nuffield bioethics report accord with opinion of surgical inpatients? *BMJ* 1996;**313**:1366-68.
22. Wheeler J, Agarwal M, Sugden J, et al. Experiences from the front-line routine consenting of surplus surgically removed tissue: without investment by the National Health Service fully informed consent for all is not available. *J Clin Pathol* 2007;**60**:351-4.

- 1  
2  
3 23. Vermeulen E, Schmidt MK, Aaronson NK, et al. A trial of consent procedures for  
4 future research with clinically derived biological samples. *British journal of cancer*  
5 2009;**101**:1505-12.  
6  
7 24. Hamajima N, Tajima K, Oya H, et al. Patients' views on residual blood use for  
8 research purposes. *Japanese journal of cancer research : Gann* 1998;**89**:341-5.  
9  
10 25. Hoeyer K, Olofsson BO, Mjorndal T, et al. Informed consent and biobanks: a  
11 population-based study of attitudes towards tissue donation for genetic research.  
12 *Scand J Public Health* 2004;**32**:224-9.  
13  
14 26. Wang SS, Fridinger F, Sheedy KM, et al. Public attitudes regarding the donation and  
15 storage of blood specimens for genetic research. *Community genetics* 2001;**4**:18-  
16 26.  
17  
18 27. Moorman PG, Skinner CS, Evans JP, et al. Racial differences in enrolment in a cancer  
19 genetics registry. *Cancer epidemiology, biomarkers & prevention : a publication*  
20 *of the American Association for Cancer Research, cosponsored by the American*  
21 *Society of Preventive Oncology* 2004;**13**:1349-54.  
22  
23 28. McQuillan GM, Porter KS, Agelli M, et al. Consent for genetic research in a general  
24 population: the NHANES experience. *Genetics in medicine : official journal of the*  
25 *American College of Medical Genetics* 2003;**5**:35-42.  
26  
27 29. Lee CI, Bassett LW, Leng M, et al. Patients' willingness to participate in a breast  
28 cancer biobank at screening mammogram. *Breast cancer research and treatment*  
29 2012;**136**:899-906.  
30  
31 30. Ma Y, Dai H, Wang L, et al. Consent for use of clinical leftover biosample: a survey  
32 among Chinese patients and the general public. *PloS one* 2012;**7**:e36050.  
33  
34 31. Kirkman M. Egg and embryo donation and the meaning of motherhood. *Women &*  
35 *health* 2003;**38**:1-18.  
36  
37 32. Millar T, Walker R, Arango JC, et al. Tissue and organ donation for research in  
38 forensic pathology: the MRC Sudden Death Brain and Tissue Bank. *The Journal of*  
39 *pathology* 2007;**213**:369-75.  
40  
41 33. Nuffield Council on Bioethics. Human bodies: donations for medicine and research.  
42 2011 [http://www.nuffieldbioethics.org/sites/default/files/Donation\\_full\\_report.pdf](http://www.nuffieldbioethics.org/sites/default/files/Donation_full_report.pdf)  
43 Accessed 26 February 2013.  
44  
45 34. Womack C, Jack AL. Family attitudes to research using samples taken at coroner's  
46 postmortem examinations: review of records. *BMJ* 2003;**327**:781-2.  
47  
48 35. [http://blog.cookcountygov.com/2012/09/12/stroger-hospital-of-cook-county-hosts-](http://blog.cookcountygov.com/2012/09/12/stroger-hospital-of-cook-county-hosts-komen-cure-tissue-bank-event-september-29th/)  
49 [komen-cure-tissue-bank-event-september-29th/](http://blog.cookcountygov.com/2012/09/12/stroger-hospital-of-cook-county-hosts-komen-cure-tissue-bank-event-september-29th/). Accessed 27 February 2013.  
50  
51 36. Jones DA. What does the British public think about human-animal hybrid embryos? *J*  
52 *Med Ethics* 2009;**35**:168-70.  
53  
54  
55  
56  
57  
58  
59  
60



- 1  
2  
3 37. Hobson-West P. The role of 'public opinion' in the UK animal research debate. *J Med*  
4 *Ethics* 2010;**36**:46-9.  
5  
6 38. Ringach DL. The use of nonhuman animals in biomedical research. *The American*  
7 *journal of the medical sciences* 2011;**342**:305-13.  
8  
9 39. Abou-Zeid A, Silverman H, Shehata M, et al. Collection, storage and use of blood  
10 samples for future research: views of Egyptian patients expressed in a cross-  
11 sectional survey. *Journal of medical ethics* 2010;**36**:539-47.  
12  
13 40. Capron AM, Mauron A, Elger BS, et al. Ethical norms and the international  
14 governance of genetic databases and biobanks: Findings from an international  
15 study. *Kennedy Institute of Ethics journal* 2009;**19**:101-24.  
16  
17  
18  
19  
20  
21  
22  
23  
24  
25  
26  
27  
28  
29  
30  
31  
32  
33  
34  
35  
36  
37  
38  
39  
40  
41  
42  
43  
44  
45  
46  
47  
48  
49  
50  
51  
52  
53  
54  
55  
56  
57  
58  
59  
60

**Manuscript title:** Public views on the donation and use of human biological samples in biomedical research – a mixed methods study

Celine Lewis<sup>1</sup>, Margaret Clotworthy<sup>2</sup>, Shona Hilton<sup>3</sup>, Caroline Magee<sup>4</sup>, Mark J Robertson<sup>5</sup>, Lesley J Stubbins<sup>6</sup>, Julie Corfield<sup>7</sup>

<sup>1</sup>Genetic Alliance UK, Unit 4D Leroy House, 436 Essex Road, London, N1 3LY, UK

<sup>2</sup>Human Focused Testing, 50 the Barns, Littleport, Cambridge, CB6 1GG, UK

<sup>3</sup>Medical Research Council/CSO Social & Public Health Sciences Unit, 4 Lilybank Gardens, Glasgow, G12 8RZ, UK

<sup>4</sup>Confederation of Cancer Biobanks, National Cancer Research Institute, Angel Building, 407 St John Street, London EC1V 4AD, UK

<sup>5</sup>AstraZeneca, Science Policy & Relations, 11G43 Mereside, Alderley Park, Macclesfield, Cheshire SK10 4TF, UK

<sup>6</sup>GlaxoSmithKline Medicines Research Centre, Gunnels Wood Road, Stevenage, Hertfordshire, SG1 2NY, UK

<sup>7</sup>Areteva Ltd, BioCity, Nottingham, NG1 1GF, UK

**Running title:** Views on donating and use of biosamples – the UK public's preferences

**Keywords:** biobanking, public willingness, public views, public preferences, biomedical research

**Correspondence to:**

Dr Celine Lewis

Genetic Alliance UK,

Unit 4D Leroy House,

436 Essex Road,

London,

N1 3QP

**Email:** [celine@geneticalliance.org.uk](mailto:celine@geneticalliance.org.uk)

**Word count:** [4937.5367](#)

**ABSTRACT**

**Objective:** A mixed methods study exploring the UK general public's willingness to donate human biosamples (HBS) for biomedical research.

**Setting:** Cross-sectional focus groups followed by an online survey.

**Participants:** Twelve focus groups (81 participants) selectively sampled to reflect a range of demographic groups; 1110 survey responders recruited through a stratified sampling method with quotas set on sex, age, geographical location, socio-economic group and ethnicity.

**Main outcome measures:** 1) identify participants' willingness to donate HBS for biomedical research; 2) explore acceptability towards donating different types of HBS in various settings; and 3) explore preferences regarding use and access to HBS.

**Results:** 87% of survey participants thought donation of HBS was important; 75% wanted to be asked to donate in general. Responders who self-reported having some or good knowledge of the medical research process were significantly more likely to want to donate ( $p < 0.001$ ). Reasons why focus group participants saw donation as important included: it was a good way of reciprocating for medical treatment received; it was an important way of developing drugs and treatments; residual tissue would otherwise go to waste; they or family members might benefit. The most controversial types of HBS to donate included: brain post mortem (29% would donate); eyes post mortem (35%); embryos (44%); spare eggs (48%) and sperm (58%). Concerning use of samples, there were concerns over animal research (34%), research conducted outside the UK (35%), and research conducted by pharmaceutical companies (56%), although education and discussion were found to alleviate such concerns during focus group discussions.

**Conclusions:** There is a high level of public support and willingness to donate HBS for biomedical research. Underlying concerns exist regarding the use of certain types of HBS and conditions under which they are used. Improved education and more controlled forms of consent for sensitive samples may mitigate such concerns.

## ARTICLE SUMMARY

### Article focus

- To explore the UK public's willingness to donate: residual biosamples following a medical procedure; biosamples donated as 'healthy volunteers'; additional biosamples during surgery; and biosamples post-mortem for medical research;
- The acceptability towards donating different types of biosamples in various settings;
- Preferences regarding use and access to biosamples.

### Key messages

- There is a high level of public support for biomedical research and willingness to donate samples for this purpose.
- Those responders who self-reported having some or good knowledge of the medical research process were significantly more likely to want to be asked to donate, supporting the need for public education to improve understanding of the research process and the contribution HBS make to this.
- Concerns exist regarding the use of certain types of samples, the conditions under which they are used and data security; greater transparency and discussion of the safeguards that exist in research is likely to alleviate some of these concerns. [More focused communication may also help address the issue that certain subgroups are under-represented and that certain kinds of tissue are infrequently donated.](#)

### Strengths and limitations of this study

- This study contributes further to our understanding of the UK public's views regarding the types of human biological samples acceptable to donate, under what circumstances and for what research purposes. This study highlights the importance of involving the public in more transparent dialogue about the use of biosamples to encourage greater public involvement and support for this area.
- This study presented participants with a series of hypothetical questions about willingness to donate biosamples for medical research. Therefore the findings may not necessarily correlate with actual behaviour.

## INTRODUCTION

A gradual shift in the approach to biomedical research has accelerated use of human biological samples (HBS) and the establishment of biobanks with associated skills and infrastructure ('biobanking') to acquire, preserve and distribute this increasingly valuable resource. Biobanks are important custodians of HBS collections, usually with access to the donors' de-identified phenotypic and clinical data[1]. Samples can comprise human materials of all kinds, including organs, tissues, biofluids such as blood, and genetic materials, such as DNA. They may be obtained from a variety of donated sources: from healthy volunteers or as residual tissue surplus to diagnostic requirements following a medical procedure, or alternatively retrieved post-mortem. Sample collections may be population-based or disease-specific, originating from a wide range of people with differing demographics, health, behaviours and lifestyles. Moreover, they may be used by a variety of research organisations, including public and private enterprises.

Public willingness to donate HBS is essential to ensure the continued provision of samples for research[2]; hence numerous studies have been conducted to examine this issue[3-7]. These studies have shown that the public is generally positive towards research using donated HBS[4-6] and the majority is in principle willing to donate[3,7]. Less well known are the public's views regarding the types of HBS acceptable to donate, under what circumstances and for what research purposes, although some research does exist in these areas. For example, research has shown the public are generally willing to donate diseased tissue or 'waste material' (such as cancerous tissue or placental tissue) for biomedical research, however, donation of eyes, brains, lungs and bone is far more contentious[7-9]. Regarding access to tissues, research by publicly-funded academic researchers has been shown to cause few concerns, in comparison to research conducted by commercial entities[10-12]. These issues are important to address to provide an insight into the key drivers motivating or preventing people from donating. Knowledge of these can also help inform biobanking governance and ensure consent procedures and patient information addresses any concerns which the public may have. This is important to help the public understand the need for, and the use of, HBS in biomedical research as well as to increase transparency and engender trust with the public. This study was conducted to broaden our understanding in these areas. Moreover, the findings are intended to inform a biobanking policy for STRATUM (Strategic Tissue Repository Alliance Through Unified Methods), a UK Government Technology Strategy Board and Industry-funded project seeking to address the problem that there are insufficient numbers of HBS and associated clinical data of adequate quality to fully support biomedical research

1  
2  
3 in the UK. This research will also help inform the design of new consent templates and  
4 deliver guidance and strategies around the consent process for biobanks and  
5 researchers.  
6

7  
8 The aims of this study were to 1) identify participants' willingness to donate HBS for  
9 biomedical research; 2) explore acceptability towards donating different types of HBS in  
10 various settings; and 3) explore preferences regarding use and access to HBS. Public  
11 views and preferences regarding consent procedures were also investigated and are  
12 described elsewhere ([Consent for the use of human biological samples for biomedical  
13 research – a mixed methods study exploring the UK public's preferences, 2013,  
14 submitted manuscript](#)).

## 15 16 17 18 19 **METHODS**

20  
21 This was a mixed methods study comprising qualitative focus groups and a quantitative  
22 on-line survey. [Focus groups were chosen as this method helps people explore and  
23 illuminate their views through debate within the group. They can also help facilitate the  
24 expression of ideas that might be left underdeveloped in an interview](#)[13]. [Focus groups  
25 have been used successfully to study the attitudes of the general public in relation to  
26 biobanking in previous research](#) [14,15]. Ethical approval for the study was granted by  
27 the University of Manchester Research Ethics Committee in April 2012. A more detailed  
28 presentation of the methods can be found in [the ~~sister~~ second](#) paper related to this  
29 study ([Consent for the use of human biological samples for biomedical research – a  
30 mixed methods study exploring the UK public's preferences, 2013, ~~submitted  
31 manuscript~~unpublished manuscript](#)).

### 32 33 34 35 36 37 38 **Focus groups**

39  
40 Twelve focus groups (including one pilot group) were conducted between May and July  
41 2012 in six different geographic locations across the UK. Participants were recruited  
42 face-to-face in the street by the market research company The Focus Group. Participants  
43 were purposively sampled; each group chosen to reflect a particular demographic (age,  
44 socio-economic group (SEG), ethnicity, 'patients' who were affected by a condition or  
45 had had an operation in the past two years) in order to gather a wide spectrum of views  
46 and enable comparisons across groups. Prior to the day, [focus group](#) participants were  
47 given an information sheet about the use of biosamples in research [in order that they  
48 had some background knowledge about the subject matter and to get them thinking  
49 about the key issues](#) (Appendix I). Focus groups were held in 'neutral' locations such as  
50 hotel conference rooms or church halls, facilitated by an experienced facilitator (CL) and  
51 digitally recorded.  
52  
53  
54  
55  
56  
57  
58  
59  
60

1  
2  
3 The topic guide explored participants' views on: willingness to donate and acceptability  
4 of donating different types of HBS; in what circumstances; for what purposes; and to  
5 whom (supplementary files: Appendix II). Recordings were transcribed and the software  
6 package NVivo version 9 (QSR International, Pty Ltd) used to facilitate data analysis.  
7 This comprised grouping responses to questions into broad thematic categories which  
8 were then refined through sub-codes. Coding was conducted by CL and verified by a  
9 second researcher to ensure inter-rater reliability. Any discrepancies were discussed  
10 between the two researchers until consensus was reached.  
11  
12  
13  
14

## 15 Survey

16  
17 The findings from the focus groups were used to inform development of a quantitative  
18 survey used to canvas public opinion on the issues of interest across a representative  
19 sample of the UK population (supplementary files: Appendix III). Key themes that were  
20 discussed or emerged from focus group discussions were reframed as survey questions;  
21 in a number of cases answer options in the survey were informed by focus group  
22 discussions (e.g. the different types of residual HBS participants were presented with  
23 were raised by focus group participants). The survey was carried out by the market  
24 research company Research Now using their online panel community of UK residents. A  
25 stratified sampling method was used: quotas were set on sex, age, geographical  
26 location, SEG and ethnicity, in line with data provided by the Office of National Statistics  
27 (ONS) to ensure the sample was as representative of the UK population as possible.  
28 Within each category, a random sample was selected from the Research Now database  
29 containing 451,185 active respondents. We aimed to recruit 1,000 responders in total. In  
30 order to reduce any on-line bias in our sample, 100 face-to-face interviews with non-  
31 internet users were conducted. An additional 'boost' sample of 100 people (not included  
32 in the main sample analysis) was also conducted with people from three minority ethnic  
33 groups ('Black', 'Chinese', 'S. Asian') so that we could conduct sub-group analysis  
34 between the groups. The main survey was then conducted in September 2012. Survey  
35 participants were not given the background information sheet about the use of  
36 biosamples in research which was given to all focus group participants. This was so that  
37 the survey responses represented the attitudes of the general public as far as possible.  
38 They were, however, given information during the survey to enable them to make  
39 informed decisions when answering the survey questions.  
40  
41  
42  
43  
44  
45  
46  
47  
48  
49  
50  
51

## 52 RESULTS

### 53 Study population

54  
55 Participant characteristics are detailed in Table 1.  
56  
57  
58  
59  
60

Table 1: Participant characteristics

| Characteristic              | Focus group<br>N=81 | Survey<br>N=1110 |
|-----------------------------|---------------------|------------------|
| <b>Gender</b>               |                     |                  |
| Male                        | 33; 41%             | 504; 45%         |
| Female                      | 48; 59%             | 606; 55%         |
| <b>Age</b>                  |                     |                  |
| 18-24                       | 13; 16%             | 135; 12%         |
| 25-34                       | 18; 22%             | 184; 17%         |
| 35-44                       | 19; 23%             | 198; 18%         |
| 45-54                       | 10; 12%             | 184; 17%         |
| 55-64                       | 16; 20%             | 176; 16%         |
| 65+                         | 5; 6%               | 233; 21%         |
| <b>Socio-economic group</b> |                     |                  |
| A                           | 9; 11%              | 41; 4%           |
| B                           | 22; 27%             | 215; 19%         |
| C1                          | 24; 30%             | 311; 28%         |
| C2                          | 14; 17%             | 233; 21%         |
| D                           | 6; 7%               | 145; 13%         |
| E                           | 6; 7%               | 165; 15%         |
| <b>Region</b>               |                     |                  |
| East of England             | 7; 7%               | 92; 8%           |
| East Midlands               | -                   | 57; 5%           |
| London                      | 18; 22%             | 213; 19%         |
| North East                  | -                   | 40; 4%           |
| North West                  | -                   | 121; 11%         |
| Northern Ireland            | -                   | 30; 3%           |
| Scotland                    | 14; 17%             | 76; 7%           |
| South East                  | 14; 17%             | 165; 15%         |
| South West                  | -                   | 81; 7%           |
| Wales                       | -                   | 51; 5%           |
| West Midlands               | 14; 17%             | 94; 8%           |
| Yorkshire/Humberlands       | 14; 17%             | 90; 8%           |
| <b>Ethnicity</b>            |                     |                  |
| White or White British      | 54; 67%             | 1057; 95%        |
| Mixed race                  | 1; 1%               | 7; 1%            |
| Asian or Asian British      | 10; 12%             | 18; 2%           |
| Black or Black British      | 9; 11%              | 19; 2%           |
| Chinese or Chinese British  | 7; 9%               | 2; 0%            |
| Other ethnic group          | 0; 0%               | 4; 0%            |
| Prefer not to say           | 0; 0%               | 3; 0%            |
| <b>Religion</b>             |                     |                  |
| Christianity                |                     | 677; 61%         |
| Islam                       |                     | 13; 1%           |
| Hinduism                    |                     | 6; 1%            |
| Sikhism                     |                     | 0; 0%            |
| Judaism                     |                     | 6; 1%            |
| Buddhism                    |                     | 11; 1%           |
| Other religion              |                     | 15; 1%           |
| No religion                 |                     | 370; 33%         |
| Prefer not to say           |                     | 12; 1%           |
| <b>Religiosity</b>          |                     |                  |
| Not at all religious        |                     | 234; 32%         |
| Moderately religious        |                     | 422; 58%         |
| Very religious              |                     | 64; 9%           |



|                                                                                 |         |          |
|---------------------------------------------------------------------------------|---------|----------|
| Prefer not to say                                                               |         | 8; 1%    |
| <b>Education</b>                                                                |         |          |
| No formal qualification                                                         | 15; 19% | 70; 6%   |
| GCSE, O level, Scottish Standard Grade or equivalent                            | 19; 23% | 264; 24% |
| GCE, A-level, Scottish Higher or similar                                        | 17; 21% | 214; 19% |
| Vocational (BTEC/NVQ/Diploma)                                                   | -       | 230; 21% |
| Degree level or above                                                           | 30; 37% | 317; 29% |
| Prefer not to say                                                               | -       | 15; 1%   |
| <b>Self reported knowledge of medical research process</b>                      |         |          |
| No knowledge                                                                    |         | 463; 42% |
| Some knowledge                                                                  |         | 603; 54% |
| Good knowledge                                                                  |         | 44; 4%   |
| <b>Have you been affected by a disability or illness?</b>                       |         |          |
| Yes                                                                             |         | 399; 36% |
| No                                                                              |         | 711; 64% |
| <b>Has a close family member been affected by a disability or illness?</b>      |         |          |
| Yes                                                                             |         | 767; 69% |
| No                                                                              |         | 343; 31% |
| <b>Have you had blood or tissue removed during a medical procedure?</b>         |         |          |
| Yes                                                                             |         | 446; 40% |
| No                                                                              |         | 553; 50% |
| Don't know                                                                      |         | 111; 10% |
| <b>Have you ever been asked to donate blood or tissue for medical research?</b> |         |          |
| Yes                                                                             |         | 182; 16% |
| No                                                                              |         | 904; 81% |
| Don't know                                                                      |         | 24; 2%   |
| <b>If so, did you agree to donate?</b>                                          |         |          |
| Yes                                                                             |         | 155; 85% |
| No                                                                              |         | 23; 13%  |
| Don't know                                                                      |         | 4; 2%    |

### Focus groups

One hundred and eighty-two members of the public who were approached were eligible and 81 people agreed to participate (45% response rate; 48 women, 33 men).

### Survey

Four thousand six hundred and seven people were invited to take part in the survey; 2014 did not respond, 860 began completing the survey but did not finish, 102 did not qualify to continue, 521 qualified for the survey but the quota was full and 1110 completed the questionnaire (28% response rate excluding those who did not qualify and where the quota was full). This response rate is comparable to similar studies on this topic[6]. Our quota sample was close to but not exactly matching our set targets.

1  
2  
3 For this reason we carried out both weighted and unweighted analyses. There was no  
4 difference in the conclusions we reached by either method. In this paper we present the  
5 unweighted results (weighted results can be found at supplementary files: Appendix IV).  
6  
7

### 8 **Interest in being asked to donate**

9

10 We began by providing a brief description of the use of HBS in biomedical research and  
11 then asked survey participants whether, in general, they wanted to be asked to donate.  
12 Three quarters (75%) of survey participants wanted to be asked (29% definitely yes,  
13 46% probably yes); 18% didn't want to (14% probably not and 4% definitely not); and  
14 7% didn't know. When asked how important they thought it was to donate HBS for  
15 biomedical research, 87% said either extremely important (50%) or important (37%).  
16 Less than 1% of participants (n=5) thought it was not at all important.  
17  
18  
19

20  
21 Respondents who wanted to be asked to donate HBS were significantly more likely to be:  
22 either not religious or only moderately so (where they did have a religious affiliation)  
23 (79.7% vs. 59.7%,  $X^2=36.56(1)$ ,  $p=0.001$ ); from higher SEG groups (A-D vs. E)(83.8%  
24 vs. 62.2%,  $X^2=36.55(1)$   $p<0.001$ ); had tissue removed during a medical or surgical  
25 procedure (87.2% vs. 73.1%,  $X^2=27.13(1)$ ,  $p<0.001$ ); had some or good knowledge of  
26 the medical research process (84.4% vs. 75.1%,  $X^2=13.04(1)$ ,  $p<0.001$ ); were under  
27 55 years (84% vs. 75.1%,  $X^2=11.56(1)$ ,  $p=0.001$ ); were 'White' (81.7% vs. 60.9%,  
28  $X^2=10.9(1)$ ,  $p=0.001$ ); have no religious affiliation (86.4% vs. 77.9%,  $X^2=9.9(1)$   
29  $p=0.002$ ); and had an education level of A level or equivalent or higher (83.4% vs.  
30 76.1%,  $X^2=7.18(1)$ ,  $p=0.007$ ). Using the boost sample for ethnic minorities we found  
31 that 'Black' participants were significantly less likely to want to be asked to donate than  
32 'White' participants (53.3% vs. 81.7%,  $X^2=20.12(1)$ ,  $p<0.001$ ). Participants who had a  
33 close family member affected by a condition were more willing to be asked to donate  
34 than those who hadn't, although the difference was not quite statistically significant  
35 (70.7% vs. 63.3%,  $X^2=3.8(1)$ ,  $p=0.051$ ).  
36  
37  
38  
39  
40  
41  
42  
43

44 Four independent variables were found to have a significant impact on participants'  
45 interest in being asked to donate tissue as shown in the logistic regression model in  
46 Table 2. The strongest predictor for wanting to be asked to donate was being from a  
47 higher socio-economic group (A-D vs. E) (OR=3.52, 95% CI 2.19-5.66,  $p<0.001$ )  
48 followed by having had tissue removed during a medical or surgical procedure  
49 (OR=2.51, 95% CI 1.65-3.84,  $p=0.001$ ), being either not at all or only moderately  
50 religious (OR=2.42, 95% CI 1.31-4.47,  $p=0.005$ ), and having self-reported some or  
51 good knowledge of the medical research process (OR=2.01, 95% CI 1.33-3.03,  
52  $p=0.001$ ).  
53  
54  
55  
56  
57  
58  
59  
60

Table 2. Multiple logistic regression examining participant willingness to donate tissue

| Participant characteristic            | Coefficient | 95% CI     | Odds ratio | p value |
|---------------------------------------|-------------|------------|------------|---------|
| Socio-economic group                  | 1.26        | 2.19, 5.66 | 3.52       | <0.001  |
| Religiosity                           | 0.89        | 1.31, 4.47 | 2.42       | 0.005   |
| Knowledge of medical research process | 0.70        | 1.33, 3.03 | 2.01       | 0.001   |
| Had tissue removed                    | 0.99        | 1.65, 3.84 | 2.51       | <0.001  |

Demographic items were excluded from this table if they were not statistically significant. All variables were entered into the models as categorical variables.  
CI: Confidence Interval.

Focus group participants also showed a strong willingness to donate HBS for biomedical research. Four key reasons were provide by participants. First, it was a good way of reciprocating for medical treatment received in the past, second, it was viewed as an "important way of developing drugs and treatments", and third, that residual tissue, which participants did not have any strong emotional ties to, would otherwise go to waste. The fourth reason offered was one of personal benefit whereby participants themselves or a family member was affected by an illness or disease.

*"Someone in my family has got Alzheimer's so I'm particularly supportive"* (Female, 18-24 focus group)

A minority of focus group participants did raise concerns. These included surgeons taking "liberties or advantage of the fact that you're out cold", concerns about data privacy and mistrust of profit-making companies using donated HBS or the government regulating their use.

*"The world's very corrupt, and if something needs to get pushed through, it gets pushed through."* Female, 'Black' focus group

Whilst interest in donating appeared to be high, it was evident that knowledge of the medical research process was low. In the survey only 4% of respondents self-reported to have a 'good knowledge' of the research process; 54% said they had 'some knowledge' and 42% said they had 'no knowledge'. Similarly, a number of focus group participants commented that the information leaflet was the first time they had heard anything about the use of donated HBS in medical research.

## **Types of HBS**

### ***Residual HBS***

The majority of survey participants were either definitely or probably willing to donate residual blood (92%); cancerous tissue (90%); fat (89%); skin tissue (88%); bone or cartilage (84%); and liver tissue (84%) following a medical procedure (Figure 1). Less

than half of participants were willing to donate spare eggs (women only) (48%) or spare embryos (44%) left over following in vitro fertilisation (IVF).

Figure 1: Would you donate the following types of samples for medical research if they were left over (after any necessary medical tests had been done) following a medical procedure?

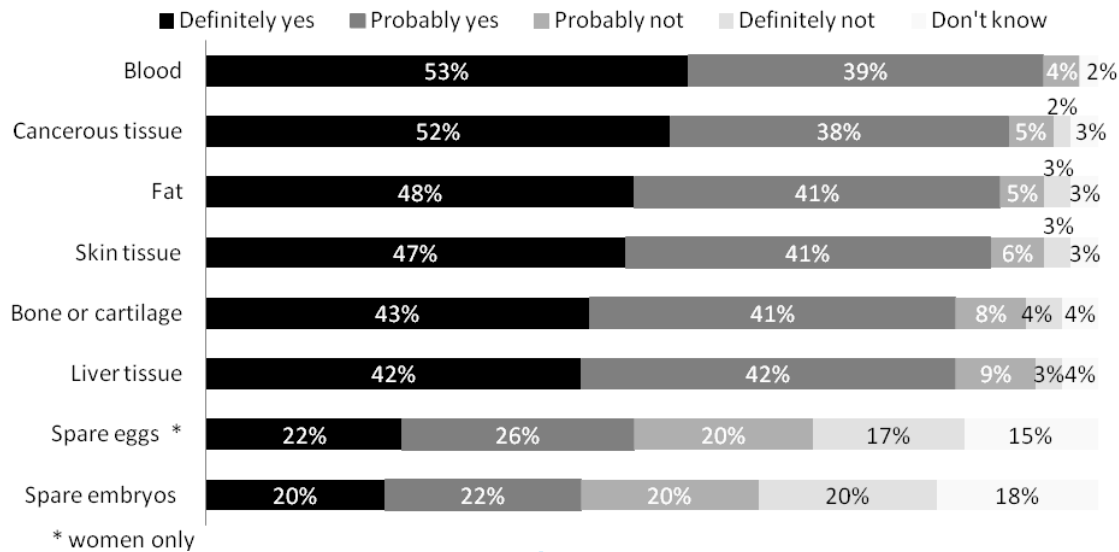

Note: percentages may not add up to 100% due to rounding.

Chi-square was conducted to examine effects of participant characteristics on willingness to donate spare eggs and spare embryos as these two tissue types caused most divide amongst participants. Willingness to donating spare embryos was significantly associated with being: male (55.9% vs. 48.3%,  $X^2=4.87(1)$ ,  $p=0.023$ ); under 55 years (55.1% vs. 45.3%,  $X^2=7.55(1)$ ,  $p=0.005$ ); from a higher (A-D) socio-economic group (54.9% vs. 32%,  $X^2=22.05(1)$ ,  $p<0.001$ ); White ethnicity (53% vs. 27.7%,  $X^2=10.48(1)$ ,  $p=0.001$ ), having a religious affiliation (63.5% vs. 45.9%,  $X^2=24.13(1)$ ,  $p<0.001$ ), being not at all or moderately religious where they did have a religious affiliation (48.1% vs. 25.5%,  $X^2=9.38(1)$ ,  $p=0.002$ ); and had had tissue removed during a medical procedure (56.9% vs. 46%,  $X^2=9.41(1)$ ,  $p=0.002$ ). Women who were willing to donate spare eggs were significantly more likely to be: from a higher socio-economic group (A-D) (58.5% vs. 44.7%,  $X^2=4.45(1)$ ,  $p=0.035$ ); White ethnicity (58.1% vs. 17.4%,  $X^2=13.21(1)$ ,  $p<0.001$ ); have no religious affiliation (71.5% vs. 50.4%,  $X^2=18.47(1)$ ,  $p<0.001$ ); be not at all or moderately religious where they did have a religious affiliation (53.5% vs. 23.7%,  $X^2=10.88(1)$ ,  $p=0.001$ ); and had had tissue removed during a medical procedure (62.8% vs. 50.4%,  $X^2=6.77(1)$ ,  $p=0.009$ ).

These results confirm our focus group findings, where most people were willing to donate residual tissue but donation of reproductive tissue raised concerns for a significant number of participants. A key concern was that reproductive tissue would be used for reproductive purposes without the knowledge of the donor.

*"Although they said it's [ethical approval process] very strict, I still in the back of my mind have a thing where someone could take my egg and have my child"* Female, had operation in past two years

A further concern related to whether it was 'right' from an ethical or religious perspective, to be conducting research on reproductive tissue.

"I would be really worried...an embryo is a baby. I know it's still very, very early days, but you're playing God." Female – patient affected by a condition

Those people who were willing to donate reproductive tissue underscored the benefits that could result from such research.

"You have to remove yourself from the situation and imagine yourself as an infertile person and maybe someone that could benefit immensely from that research." Female – 18-24 focus group

Some did, however, highlight the importance of being informed as to how reproductive tissue would be used because of its sensitive nature.

### 'Healthy' volunteers

Survey participants were then presented with a scenario in which they were asked to imagine that they are in a hospital waiting room awaiting an appointment and are asked whether they would donate certain types of HBS specifically for the purposes of medical research (Figure 2). Most responders were either definitely or probably willing to donate urine (89%), saliva (89%) and blood (81%), however, fewer people would donate tissue taken during a local anaesthetic (67%) or sperm (men only) (58%).

Would you agree to donate the following types of samples specifically for medical research, i.e. not as part of any medical procedure, but purely for the purposes of research?

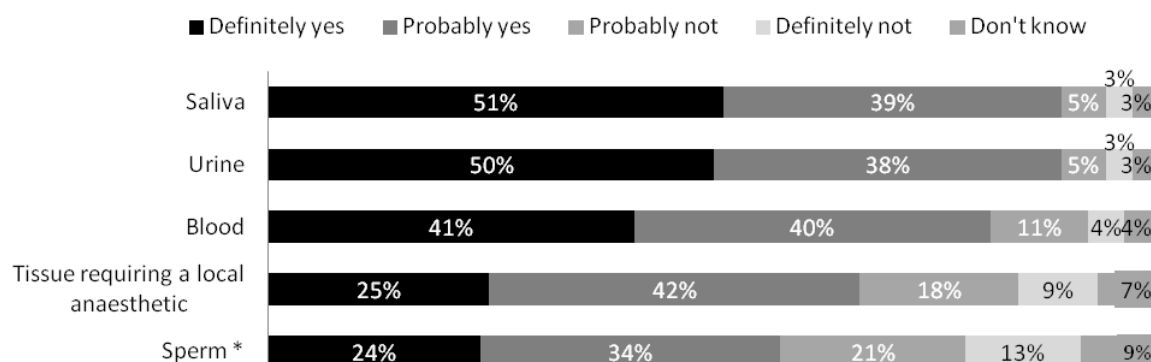

Note: percentages may not add up to 100% due to rounding.

Chi-square was conducted to examine effects of participant characteristics on willingness to donate tissue requiring a local anaesthetic and sperm as these two tissue types caused most divide amongst participants. Willingness to donate tissue requiring a local anaesthetic was significantly associated with: being over 25 years (72.9% vs. 59.3%,  $X^2=9(1)$ ,  $p=0.003$ ); from a higher socio-economic group (A-D) (73.1% vs. 60.9%,  $X^2=9.03(1)$ ;  $p=0.003$ ), White ethnicity (72.3% vs. 48.9%,  $X^2=10.87(1)$ ,  $p=0.001$ ); being not at all or moderately religious where they had a religious affiliation (71.4% vs. 49.2%,  $X^2= 11.53(1)$ ,  $p=0.001$ ); having good knowledge of the medical research process (75.8% vs. 64.5%,  $X^2=14.96(1)$ ,  $p=0.001$ ), had had tissue removed during a medical procedure (77.9% vs. 64%,  $X^2=20.77(1)$ ,  $p<0.001$ ), and had agreed to donate left over tissue (82.8% vs. 45.5%,  $X^2=13.51(1)$ ,  $p<0.001$ ). Men who were willing to donate sperm were significantly more likely to be: from a higher socio-economic group (A-D) (66.8% vs. 42%,  $X^2=14.47(1)$ ,

p<0.001); White ethnicity (65.8% vs. 22.2%,  $X^2=18.95(1)$ , p<0.001), and be either not at all or moderately religious where they did have a religious affiliation (64.3% vs. 36.4%,  $X^2=5.61(1)$ , p=0.018).

Focus group participants were also generally positive towards donating HBS specifically for research purposes, although some commented that they would not want to undergo an invasive procedure.

*"Depends on what they wanted, if it's not invasive or nothing then I'd say yes."* Female – 'Black' focus group

A number said they would be more likely to donate HBS if they did not have to travel somewhere specifically to do so. Focus group participants also appeared to want more information about how their sample would be used if they were donating HBS as 'healthy' volunteers.

*"I'd want to know the purpose behind it but if I'm helping something then why not?"* Male – 'Chinese' focus group

### **Additional HBS during surgery**

Finally, survey participants were presented with a scenario in which they are having surgery which requires a general anaesthetic, and asked whether they would be willing to have additional tissue taken not required to be removed for therapeutic benefit. Over three quarters of responders (78%) were willing to donate HBS taken from the same part of the body being operated on, 63% were willing to donate HBS taken from an area close by, and 44% would donate HBS involving an additional procedure e.g. taking bone marrow whilst under the same general anaesthetic.

This scenario was not explored explicitly with focus group participants, but was included in the survey as a number had aired concerns about surgeons taking additional tissue during surgery without consent.

*"I would be worried about giving consent before they performed an operation in case the main task of the operation is to remove cancer...and they take some tissue for research. I think it would be OK but only if they asked."* Male, 18-24 group

### **Donation of HBS in the event of one's death**

We explored whether the public were willing to donate tissue and whole organs in the event of their death. First, we compared survey responders' views concerning the donation of tissue taken from an organ compared to donating a whole organ using the liver and brain as examples. We found that tissue type had a greater impact on people's

1  
2  
3 willingness to donate than amount of tissue: 89% of people were willing to donate liver  
4 tissue; 68% a whole liver; 66% brain tissue; 53% a whole brain. On presenting  
5 participants with a list of organs and asking them whether there were any whole organs  
6 they would not consider donating for medical research in the event of their death, 71%  
7 would not donate their brain, 65% would not donate their eyes, 27% would not donate  
8 their heart, 14% would not donate their liver; 14% would not donate their lungs and  
9 13% would not donate their kidneys. Five people (0.5%) said they would not donate  
10 reproductive tissue in the free text box. Seventeen percent would not donate any organs  
11 for medical research.  
12  
13  
14  
15  
16  
17  
18

19 Donating whole organs for medical research in the event of one's death caused unease  
20 for a number of focus group participants. Some had concerns about the impact on family  
21 members, citing that it was a "sensitive subject" that may make them feel  
22 "uncomfortable". A woman in the South Asian group cited religious reasons for not  
23 wanting to donate organs. Others didn't like the idea of their body being "chopped up  
24 like on a butcher's board" and preferred "to remain whole" and "untouched". A few  
25 participants erroneously believed that their organs would not be useful to researchers  
26 because they were old or unhealthy. When focusing on particular organs, eyes were  
27 found to be most contentious and made participants feel "funny" or "squeamish". They  
28 also had concerns that eyes were "identifiable".  
29  
30  
31  
32  
33  
34

35 When asked whether they would be willing to donate whole organs not suitable for  
36 transplant for research purposes instead, 68% of survey responders said they would,  
37 11% would prefer they were not used at all if they couldn't be used for transplant, 9%  
38 would not agree to donate an organ for transplant and 12% didn't know.  
39  
40

### 41 **Uses of HBS**

42  
43 The most controversial types of research were research involving HBS in combination  
44 with animals (only 34% of survey participants would donate for this purpose), research  
45 conducted outside the UK (35%), and research involving 'cells from embryos' (41%)  
46 (Figure 3). Research into understanding how our body fights disease was the least  
47 controversial (85%).  
48  
49  
50  
51  
52  
53  
54  
55  
56  
57  
58  
59  
60

Figure 3: Would you be willing to donate samples for the following type of samples for research?

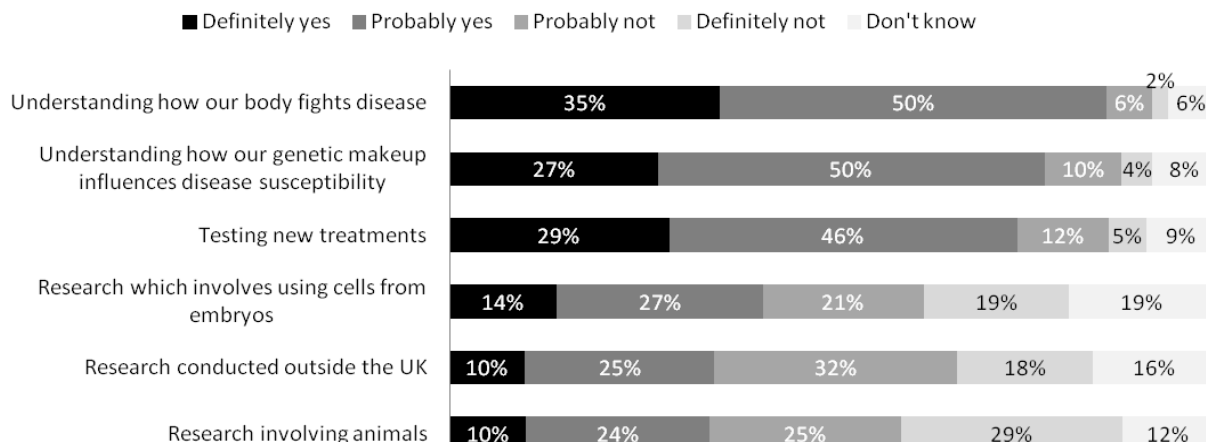

Note: percentages may not add up to 100% due to rounding.

Chi-square was conducted to examine effects of participant characteristics on willingness to donate samples for research outside the UK and research involving animals as these two research types had least support. Those participants who were less willing to donate samples for research outside the UK were significantly more likely to be: over 55 years (67.8% vs. 53.8%,  $X^2=17.2(1)$ ,  $P=0.001$ ); from a low socio-economic group (E) (72.8% vs. 56.6%,  $X^2=11.92(1)$ ,  $p=0.001$ ); non-white ethnicity (78% vs. 58%,  $X^2=5.7(1)$ ,  $p=0.017$ ); have a religious affiliation (63.4% vs. 49.8%,  $X^2=14.83(1)$ ,  $p=0.001$ ); have a lower education level (GCSE or equivalent or lower) (65.9% vs. 55.5%,  $X^2=8.18(1)$ ,  $p=0.004$ ); and had not had tissue removed during a medical procedure (62.5% vs. 55%,  $X^2=4.57(1)$ ,  $p=0.033$ ). Those participants who were less willing to donate samples for research involving animals were significantly more likely to be: female (69.5% vs. 51.8%,  $X^2=30.74(1)$ ,  $p<0.001$ ); from a low socio-economic group (E) (78% vs. 58.4%,  $X^2=19.9(1)$ ,  $p<0.001$ ); non-white ethnicity (80% vs. 60.5%,  $X^2=6.09(1)$ ,  $p=0.014$ ); have a religious affiliation (63.6% vs. 56.7%,  $X^2=4.02(1)$ ,  $p=0.045$ ); be very religious whereby they did have a religious affiliation (78.7% vs. 61.9%,  $X^2=5.99(1)$ ,  $p=0.014$ ); have no knowledge of the medical research process (67.6% vs. 57.1%,  $X^2=10.4(1)$ ;  $p=0.001$ ) and had not agreed to donate leftover tissue for medical research (81% vs. 49.3%,  $X^2=6.12(1)$ ,  $p=0.013$ ).

Research involving animals was cited as a cause for concern by a number of focus group participants, particularly if the research caused the animals "excessive pain". Others had concerns about the way animals were cared for in research settings. Nevertheless, a view held by a significant number of people was that research and drugs tested on animals was "not a nice thought...but in the long run the best option" and that "the information gained from watching [an animal used in research] might help thousands of people".

Research conducted outside the UK was a concern for some focus group participants because other countries might not have similarly strict governance arrangements as those that exist in the UK, or because HBS might be sold. Other types of research cited as being controversial included cloning, stem cell research, genetic engineering and "designer babies".

### Access to HBS



Most survey responders were willing to donate HBS to NHS hospitals (84%), medical research charities (79%), universities (68%), diagnostic companies (63%) and pharmaceutical companies (56%) (Figure 4).

Figure 4: Would you be willing to donate samples to the following organisations to carry out approved research?

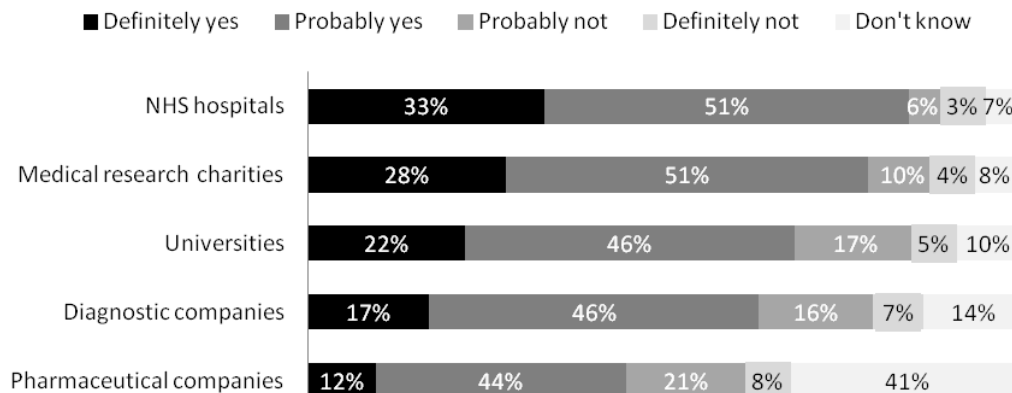

Note: percentages may not add up to 100% due to rounding.

Chi-square was conducted to examine effects of participant characteristics on willingness to donate samples for pharmaceutical companies as this organisation had the least support. Those participants who were less willing to donate samples to pharmaceutical companies were significantly more likely to be: over 55 years (39.4% vs. 31.3%,  $X^2=6.16(1)$ ,  $p=0.013$ ); from a low socio-economic group (E) (43.4% vs. 32.6%,  $X^2=5.91(1)$ ;  $p=0.015$ ), non-white ethnicity (60.9% vs. 32.9%,  $X^2=14(1)$ ,  $p=0.001$ ); live in London (45.1% vs. 31.7%,  $X^2=11.02(1)$ ,  $p=0.001$ ); have a religious affiliation (38.1% vs. 26.9%(1),  $X^2=11.1(1)$ ,  $p=0.001$ ); be very religious whereby they had a religious affiliation (54.5% vs. 36.7%,  $X^2=6(1)$ ,  $p=0.014$ ); have no knowledge of the medical research process (38.3% vs. 31.6%,  $X^2=4.14(1)$ ,  $p=0.042$ ); and had not had tissue removed during a medical procedure (38% vs. 29.8%,  $X^2=6(1)$ ,  $p=0.014$ ).

Focus group discussions highlighted that there was generally a high level of faith in the benefits of science, and trust towards the NHS, charities and universities, who were seen as contributing positively towards society. The role of ethics review boards and legal systems in providing oversight and control of medical research was considered important, nevertheless, it was acknowledged that most people are unaware of these safeguards.

*"I do now know something about the process, and like the ethics side and presenting to a board, but before I wouldn't have known anything about the research process. So I guess I'm just thinking, how would I feel if I didn't know about those procedures?"*

Female – pilot group

Some initial negativity was found in relation to pharmaceutical companies conducting research because of their commercial, profit-making nature and concerns that they "exploit patients". However, such concerns were often addressed by other members of

1  
2  
3 the group who acknowledged that commercialisation of research was “a fact of life” and  
4 that pharmaceutical companies “need to make money to keep their research going”.

### 6 7 **Medical records and lifestyle information**

8  
9 We asked participants whether they would be willing to have medical records and  
10 lifestyle information linked but de-identified (so that the sample is anonymous to the  
11 researcher but contains codes that would allow others to identify an individual from it) to  
12 their biosample. Sixty eight percent of survey responders would, 22% would not and  
13 10% didn't know. Survey responders were more willing to have their de-identified  
14 lifestyle information linked to their biosample; 82% would, 12% would not, and 6%  
15 didn't know.  
16  
17  
18

19  
20 Concerns about linking medical records with HBS were raised by focus group  
21 participants. Data protection and privacy were two key concerns, for example,  
22 participants were worried that their personal data might be “hacked or mislaid”. Others  
23 cited concerns about data being accessed by the police or insurance companies. Some  
24 participants felt uncomfortable about sensitive medical details such as sexual diseases or  
25 illegal drug use being seen by people unconnected with their health. Nevertheless, most  
26 participants understood the importance of linking medical records and lifestyle  
27 information to HBS as long as they were not identifiable.  
28  
29  
30  
31

32  
33 *“You want the sample to be as useful as possible so you want to give them the most*  
34 *complete picture. You want to give them all the information that is available.”* Male – had  
35 operation in past two years.  
36  
37

### 38 **DISCUSSION**

39  
40 Results from this study are consistent with the findings from other empirical research  
41 that there is a high level of public support for biomedical research and willingness to  
42 donate HBS for this purpose[3-5,7,16-18]. However, by presenting participants with  
43 scenarios consisting of a variety of HBS types across a number of settings, and by using  
44 both qualitative and quantitative methods, we have been able to build a richer  
45 understanding of public attitudes. Whilst it is important to bear in mind that the opinions  
46 expressed are hypothetical and therefore do not necessarily correspond with how people  
47 would actually behave in practice, they still offer an intriguing insight into public  
48 attitudes which can help inform policy and practice.  
49  
50  
51  
52

53  
54 The general willingness of the UK public to donate residual HBS is consistent with  
55 findings from other studies conducted in the UK, USA and Scandinavia where willingness  
56 to donate varied from 67%-88%[3-5,7,16,17]. Interestingly, people who themselves  
57  
58  
59  
60

1  
2  
3 had had tissue removed were significantly more likely to want to be asked to donate  
4 than those that hadn't (87% compared to 73%). A number of other studies conducted in  
5 the UK and elsewhere have found patient willingness to be high, between 83%-99%[19-  
6 24]. This is likely to be because donation of surplus tissue provides patients with an  
7 opportunity to reciprocate or demonstrate gratitude towards those involved in the  
8 therapeutic process[21] or because they have had the medical need explained to them  
9 and can relate to the experience more closely. Those responders who self-reported  
10 having some or good knowledge of the medical research process were also significantly  
11 more likely to want to be asked to donate. This finding supports the need for public  
12 education to improve understanding of the research process and the contribution HBS  
13 make to this. ~~We identified that more people. Another striking finding was the apparent~~  
14 ~~discrepancy between people who~~ saw biosample donation as important (87%) ~~than~~  
15 ~~and those who~~ wanted to be asked to donate (75%). It may be that although people see  
16 donation as important, other concerns e.g. around issues such as data privacy, or other  
17 ethical considerations such as commercial use of HBS may prevent some people from  
18 donating; concerns have been identified in this and other empirical studies[5,15,19,25].  
19  
20  
21  
22  
23  
24  
25  
26

27 Lower levels of support for HBS donation were identified amongst minority ethnic  
28 groups, a finding that has been seen elsewhere, particularly amongst African-  
29 Americans[18,26-28] and Asian-American women[29]. A study conducted in China also  
30 found that public and patient willingness to donate residual tissue was low compared to  
31 studies conducted in the UK, Scandinavia and the USA, at only 65%[30]. These  
32 differences may stem from different cultural attitudes towards donation, religious beliefs  
33 or low levels of trust in public institutions (which may stem from previous breaches of  
34 trust as highlighted by Ma et al.[30] amongst the 'Chinese' population). Mistrust of  
35 profit-making companies and the government were identified during focus group  
36 discussions with ethnic minority groups in this study, although not exclusively so.  
37 Information about the role of ethics review boards in safeguarding participants' interests  
38 is therefore vital for ensuring public trust.  
39  
40  
41  
42  
43  
44

45 A large proportion of people were unwilling to donate reproductive tissue. This type of  
46 HBS donation raised a number of unique moral, ethical and social concerns, as  
47 exemplified by focus group discussions. Interestingly, the survey showed that men were  
48 more likely to donate semen than women were excess eggs following an IVF procedure  
49 (58% v 48%), which may indicate egg donation is a more contentious issue or that  
50 women feel a greater attachment to eggs than men to sperm[31]. Another possible  
51 reason may be the limited number of eggs that a woman has, and the greater effort and  
52 risk required to make them available *ex vivo*, resulting in a more judicious approach to  
53 their use; for example, women may prefer to keep excess eggs following IVF for future  
54  
55  
56  
57  
58  
59  
60

1  
2  
3 uses rather than donate them for research. More controlled forms of consent (tiered or  
4 specific) may be one way of alleviating concerns people may have about donating  
5 sensitive HBS.  
6

7  
8 When asked to consider post-mortem donation, eyes and brains were considered the  
9 least desirable organs to donate for research purposes, a finding that has been reported  
10 elsewhere[7]. As the donation of eyes is crucial for vision research and drug testing, and  
11 with donated brains being essential for research into conditions such as multiple  
12 sclerosis, Alzheimer's and Parkinson's disease, different ways of raising awareness and  
13 motivating donation need to be considered. For example, completely transparent  
14 discussion with families on the day prior to forensic post-mortem examination,  
15 conducted in a sensitive manner, has led to research authorisation and donation in a  
16 very high proportion of cases to the Sudden Death Brain and Tissue Bank in  
17 Edinburgh[32]. It may also be worth considering incentives to donation for research, as  
18 have already been discussed in depth elsewhere, although with a greater emphasis on  
19 donation for transplant[33]. Our research highlights that a significant number of people  
20 (68%) would be willing to donate whole organs not suitable for transplant for research  
21 purposes instead. Such soft incentives are likely to be welcomed by families, a finding  
22 which has also been reported by Womack et al.[34] where over 70% of family members  
23 consented for the retrieval of blood and tissue at the time of post-mortem examination.  
24  
25

26  
27 The finding that 67% of people were willing to undergo a local anaesthetic to donate  
28 tissue seems unusually high at first glance. Nevertheless, such a finding should not be  
29 dismissed; women have been known to undergo local aesthetic to donate healthy breast  
30 tissue for breast cancer research, as evidenced by the 2800 women who have donated to  
31 the Komen Tissue Bank in the United States[35]. The finding that a significant proportion  
32 of the public are willing to donate as 'healthy volunteers' also supports the premise that  
33 there is a strong altruistic desire to contribute to medical research and a high level of  
34 trust in and support for the research process[8].  
35  
36

37  
38 Research involving animals and research conducted outside the UK were the least  
39 supported research types in this study. Animal research remains a controversial topic  
40 and much empirical and ethical debate has focused on this issue[36-38]. However, the  
41 finding that a large proportion of the public do not want their HBS used for research  
42 outside the UK is intriguing. Our qualitative data show that concerns exist around  
43 regulation and commodification of HBS, findings supported elsewhere in the  
44 literature[39,40]. To address these concerns, potential donors should be provided with  
45 information related to the specific issues that relate to those countries where HBS are  
46 likely to be sent.  
47  
48  
49  
50  
51  
52  
53  
54  
55  
56  
57  
58  
59  
60

1  
2  
3 Regarding access to donated HBS, overall findings indicate high levels of trust towards  
4 research organisations conducting biomedical research. Lowest trust was afforded to  
5 pharmaceutical companies, primarily because of their profit-making nature, a finding  
6 which concurs with other studies[5,10,11]. Greater transparency and education of the  
7 public by the research community about the role pharmaceutical companies play in  
8 research and drug development (as is currently being conducted through initiatives such  
9 as EUPATI; www.patientsacademy.eu), will help to highlight the collaborations that  
10 frequently exist between private and public enterprises. Emphasising the safeguards that  
11 exist in research through regulation and ethics review boards is also likely to alleviate  
12 some of these concerns.  
13  
14  
15  
16  
17

18 Finally, our research reinforces the concerns held by the public regarding the linking of  
19 de-identified clinical data to HBS[19,25]. Discussion during the consent procedure  
20 around the value of associated clinical data, and the safeguards in place to ensure data  
21 security, may go some way to reducing these worries. Similarly, the strict governance  
22 arrangements around access to personal information by third parties including the police,  
23 insurance companies and employers should be made clear.  
24  
25  
26  
27

### 28 **Strengths and Limitations**

29  
30 As with any qualitative research, the findings from this study rely on the researcher's  
31 interpretation of comments made by focus group participants. Nevertheless, we have  
32 used a methodology grounded in the data and ensured inter-rater reliability through  
33 cross-checking coding to ensure the interpretation was as close to the intended meaning  
34 as possible. Moreover, we have been able to verify focus group findings through the  
35 results from the survey. A major limitation of this study is its hypothetical nature; hence  
36 the results need to be interpreted with caution. Nevertheless, where possible, we  
37 presented questions as scenarios to try and make them as 'real' as possible. We also  
38 provided focus group participants with a background information sheet so that they had  
39 some knowledge about the subject matter before the discussion took place, and as such  
40 were likely to be more well informed than the general public. Survey participants were  
41 not given this information sheet and were only given selective background information  
42 that it was felt (by the authors) was necessary to enable them to make informed  
43 decision when answering the questions. This in itself, however, may have impacted the  
44 representativeness of the findings as they may have responded differently if no  
45 background information had been provided. A further limitation is that the dropout rate  
46 was relatively high; participants that did complete the survey may have done so because  
47 of a strong attachment to the issues raised and this may have skewed the results.  
48 However, every effort was made to ensure that the results were as representative of the  
49  
50  
51  
52  
53  
54  
55  
56  
57  
58  
59  
60

1  
2  
3 UK population as possible. Finally, the focus groups and survey were conducted in  
4 English which excluded those people who were not competent English speakers and/or  
5 readers. Our findings are therefore not necessarily representative of the non-English  
6 speaking community living in the UK.  
7  
8  
9

## 10 11 12 **CONCLUSION**

13  
14 There is a high level of public support for, and willingness to contribute to biobanking  
15 and the research process. In particular, people appear keen to contribute to research  
16 above and beyond the donation of residual tissue. Nevertheless, underlying concerns  
17 exist regarding the use of certain types of HBS, the conditions under which they are  
18 used and data security, although these issues did not necessarily preclude willingness to  
19 participate. Improved public education in these areas, for example, through the  
20 development of a 'Frequently Asked Questions' document which includes information on  
21 the ethics infrastructure that exists in the UK may mitigate some of these concerns.  
22  
23 More controlled forms of consent and focused communication for sensitive types of HBS  
24 and donation incentives may also positively impact public willingness to donate  
25 infrequently donated tissue types. More focused communication may also address the  
26 finding that certain sub-groups, such as particular minority ethnic groups, are less likely  
27 to donate. Finally, greater transparency in the biomedical research process and the  
28 fostering of trust in those organisations involved throughout that process is vital to  
29 ensure the process of donating tissue to biobanks is satisfactory to all parties involved.  
30  
31  
32  
33  
34  
35

36 These suggestions should be considered by the research community and policy makers.  
37  
38  
39

40  
41 **Acknowledgements** We would like to thank Lisa Bennett, Sarah Dickson, Catherine  
42 Elliott, James Ironside and Chris Womack and for their helpful comments on this paper;  
43 Sarah Dickson, Jim Elliott and Neil Formstone for their contribution to the design of the  
44 study; and Samantha Reeve and Zheng Lei for help with data analysis.  
45  
46

47  
48 **Funding statement** This work was supported by a grant from the Technology Strategy  
49 Board through the Stratified Medicines Competition grant number 101021, direct  
50 financial contributions by AstraZeneca and resource in kind by AstraZeneca,  
51 GlaxoSmithKline and Lab 21.  
52  
53

54  
55 **Competing interests:** Lesley Stubbins is an employee of GlaxoSmithKline. Mark  
56 Robertson is an employee of AstraZeneca.  
57  
58  
59  
60

1  
2  
3 **Contributors:** J.C. conceived the study. All authors contributed to the study design. In  
4 addition to all the authors, Sarah Dickson, Jim Elliott and the late Neil Formstone also  
5 contributed towards the design of the study and development of the focus group and  
6 survey questions. C.L. facilitated the focus groups. Focus group recruitment was  
7 conducted by the company The Focus Group; the survey was conducted through the  
8 market research company Research Now. C.L. conducted data analysis and  
9 interpretation with the help of Samantha Reeve and Zheng Lei. The initial draft of the  
10 manuscript was prepared by C.L and then circulated repeatedly among the authors for  
11 critical revision. All authors approved the final manuscript.  
12  
13  
14  
15

16  
17 **Ethical approval** This study was approved by the Ethics Review Board of the University  
18 of Manchester, reference 11459.  
19

20  
21 **Data sharing statement** Transcripts from the focus groups and full results of the  
22 survey are available from CL at [celine@geneticalliance.org.uk](mailto:celine@geneticalliance.org.uk). Supplementary material is  
23 also available at [www.geneticalliance.org.uk/projects/stratum\\_docs.htm](http://www.geneticalliance.org.uk/projects/stratum_docs.htm)  
24  
25

## 26 27 REFERENCES

- 28 1. Kaiser J. Biobanks. Population databases boom, from Iceland to the U.S. *Science*  
29 2002;**298**:1158-61.
- 30 2. Tutton R, Kaye J, Hoeyer K. Governing UK Biobank: the importance of ensuring public  
31 trust. *Trends in biotechnology* 2004;**22**:284-5.
- 32 3. Kaufman D, Bollinger J, Dvoskin R, et al. Preferences for opt-in and opt-out  
33 enrollment and consent models in biobank research: a national survey of  
34 Veterans Administration patients. *Genetics in medicine : official journal of the*  
35 *American College of Medical Genetics* 2012;**14**:787-94.
- 36 4. Kettis-Lindblad Å, Ring L, Viberth E, et al. Genetic research and donation of tissue  
37 samples to biobanks. What do potential sample donors in the Swedish general  
38 public think? *The European Journal of Public Health* 2006;**16**:433-40.
- 39 5. Tupasela A, Sihvo S, Snell K, et al. Attitudes towards biomedical use of tissue sample  
40 collections, consent, and biobanks among Finns. *Scandinavian Journal of Public*  
41 *Health* 2010;**38**:46-52.
- 42 6. Simon CM, L'Heureux J, Murray JC, et al. Active choice but not too active: Public  
43 perspectives on biobank consent models. *Genetics in Medicine* 2011;**13**:821-31.
- 44 7. Goodson ML, Vernon BG. A study of public opinion on the use of tissue samples from  
45 living subjects for clinical research. *Journal of clinical pathology* 2004;**57**:135-38.
- 46 8. Morrell B, Lipworth W, Axler R, et al. Cancer as Rubbish: Donation of Tumor Tissue for  
47 Research. *Qualitative health research* 2011;**21**:75-84.  
48  
49  
50  
51  
52  
53  
54  
55  
56  
57  
58  
59  
60

- 1  
2  
3 9. Barr M. I'm not Really Read up on Genetics': biobanks and the social context of  
4 informed consent. *BioSocieties* 2006;**1**:251-62.
- 5  
6 10. Haddow G, Cunningham-Burley S, Bruce A, et al. Generation Scotland: consulting  
7 publics and specialists at an early stage in a genetic database's development.  
8 *Critical Public Health* 2008;**18**:139-49.
- 9  
10 11. Budimir D, Polasek O, Marusic A, et al. Ethical aspects of human biobanks: a  
11 systematic review. *Croat Med J* 2011;**52**:262-79.
- 12  
13 12. Lipworth W, Morrell B, Irvine R, et al. An empirical reappraisal of public trust in  
14 biobanking research: rethinking restrictive consent requirements. *Journal of law*  
15 *and medicine* 2009;**17**:119-32.
- 16  
17 13. Kitzinger J. Focus groups. In: Pope C, Mays N, eds. *Qualitative research in health*  
18 *care*. 3rd ed. Oxford: Blackwell Publishing Ltd. , 2006.
- 19  
20 14. Tutton R. Constructing participation in genetic databases. *Science, Technology &*  
21 *Human Values* 2007;**32**:172-95.
- 22  
23 15. Haddow G, Bruce A, Sathanandam S, et al. 'Nothing is really safe': a focus group  
24 study on the processes of anonymizing and sharing of health data for research  
25 purposes. *Journal of evaluation in clinical practice* 2010;**17**:1140-6.
- 26  
27 16. Kaufman DJ, Murphy-Bollinger J, Scott J, et al. Public Opinion about the Importance  
28 of Privacy in Biobank Research. *The American Journal of Human Genetics*  
29 2009;**85**:643-54.
- 30  
31 17. Ipsos MORI Social Research Institute. Human Tissue Authority General Public  
32 Survey. 2010 [http://www.hta.gov.uk/  
33 db/ documents/2007-09-  
34 10\\_Ipsos\\_MORI\\_general\\_public\\_qual\\_and\\_quant\\_report\\_final\\_200709101952.pdf](http://www.hta.gov.uk/db/documents/2007-09-10_Ipsos_MORI_general_public_qual_and_quant_report_final_200709101952.pdf)  
35 Accessed 26 February 2013.
- 36  
37 18. Chen DT, Rosenstein DL, Muthappan P, et al. Research with stored biological  
38 samples: what do research participants want? *Arch Intern Med* 2005;**165**:652-5.
- 39  
40 19. Jack AL, Womack C. Why surgical patients do not donate tissue for commercial  
41 research: review of records. *BMJ* 2003;**327**:262.
- 42  
43 20. Bryant RJ, Harrison RF, Start RD, et al. Ownership and uses of human tissue: what  
44 are the opinions of surgical in-patients? *Journal of clinical pathology*  
45 2008;**61**:322-26.
- 46  
47 21. Start RD, Brown W, Bryant RJ, et al. Ownership and uses of human tissue: Does the  
48 Nuffield bioethics report accord with opinion of surgical inpatients? *BMJ*  
49 1996;**313**:1366-68.
- 50  
51 22. Wheeler J, Agarwal M, Sugden J, et al. Experiences from the front-line routine  
52 consenting of surplus surgically removed tissue: without investment by the  
53 National Health Service fully informed consent for all is not available. *J Clin Pathol*  
54 2007;**60**:351-4.
- 55  
56  
57  
58  
59  
60



- 1  
2  
3 23. Vermeulen E, Schmidt MK, Aaronson NK, et al. A trial of consent procedures for  
4 future research with clinically derived biological samples. *British journal of cancer*  
5 2009;**101**:1505-12.
- 6  
7 24. Hamajima N, Tajima K, Oya H, et al. Patients' views on residual blood use for  
8 research purposes. *Japanese journal of cancer research : Gann* 1998;**89**:341-5.
- 9  
10 25. Hoeyer K, Olofsson BO, Mjorndal T, et al. Informed consent and biobanks: a  
11 population-based study of attitudes towards tissue donation for genetic research.  
12 *Scand J Public Health* 2004;**32**:224-9.
- 13  
14 26. Wang SS, Fridinger F, Sheedy KM, et al. Public attitudes regarding the donation and  
15 storage of blood specimens for genetic research. *Community genetics* 2001;**4**:18-  
16 26.
- 17  
18 27. Moorman PG, Skinner CS, Evans JP, et al. Racial differences in enrolment in a cancer  
19 genetics registry. *Cancer epidemiology, biomarkers & prevention : a publication*  
20 *of the American Association for Cancer Research, cosponsored by the American*  
21 *Society of Preventive Oncology* 2004;**13**:1349-54.
- 22  
23 28. McQuillan GM, Porter KS, Agelli M, et al. Consent for genetic research in a general  
24 population: the NHANES experience. *Genetics in medicine : official journal of the*  
25 *American College of Medical Genetics* 2003;**5**:35-42.
- 26  
27 29. Lee CI, Bassett LW, Leng M, et al. Patients' willingness to participate in a breast  
28 cancer biobank at screening mammogram. *Breast cancer research and treatment*  
29 2012;**136**:899-906.
- 30  
31 30. Ma Y, Dai H, Wang L, et al. Consent for use of clinical leftover biosample: a survey  
32 among Chinese patients and the general public. *PloS one* 2012;**7**:e36050.
- 33  
34 31. Kirkman M. Egg and embryo donation and the meaning of motherhood. *Women &*  
35 *health* 2003;**38**:1-18.
- 36  
37 32. Millar T, Walker R, Arango JC, et al. Tissue and organ donation for research in  
38 forensic pathology: the MRC Sudden Death Brain and Tissue Bank. *The Journal of*  
39 *pathology* 2007;**213**:369-75.
- 40  
41 33. Nuffield Council on Bioethics. Human bodies: donations for medicine and research.  
42 2011 [http://www.nuffieldbioethics.org/sites/default/files/Donation\\_full\\_report.pdf](http://www.nuffieldbioethics.org/sites/default/files/Donation_full_report.pdf)  
43 Accessed 26 February 2013.
- 44  
45 34. Womack C, Jack AL. Family attitudes to research using samples taken at coroner's  
46 postmortem examinations: review of records. *BMJ* 2003;**327**:781-2.
- 47  
48 35. [http://blog.cookcountygov.com/2012/09/12/stroger-hospital-of-cook-county-hosts-](http://blog.cookcountygov.com/2012/09/12/stroger-hospital-of-cook-county-hosts-komen-cure-tissue-bank-event-september-29th/)  
49 [komen-cure-tissue-bank-event-september-29th/](http://blog.cookcountygov.com/2012/09/12/stroger-hospital-of-cook-county-hosts-komen-cure-tissue-bank-event-september-29th/). Accessed 27 February 2013.
- 50  
51 36. Jones DA. What does the British public think about human-animal hybrid embryos? *J*  
52 *Med Ethics* 2009;**35**:168-70.
- 53  
54  
55  
56  
57  
58  
59  
60

- 1  
2  
3 37. Hobson-West P. The role of 'public opinion' in the UK animal research debate. *J Med*  
4 *Ethics* 2010;**36**:46-9.  
5  
6 38. Ringach DL. The use of nonhuman animals in biomedical research. *The American*  
7 *journal of the medical sciences* 2011;**342**:305-13.  
8  
9 39. Abou-Zeid A, Silverman H, Shehata M, et al. Collection, storage and use of blood  
10 samples for future research: views of Egyptian patients expressed in a cross-  
11 sectional survey. *Journal of medical ethics* 2010;**36**:539-47.  
12  
13 40. Capron AM, Mauron A, Elger BS, et al. Ethical norms and the international  
14 governance of genetic databases and biobanks: Findings from an international  
15 study. *Kennedy Institute of Ethics journal* 2009;**19**:101-24.  
16  
17  
18  
19  
20  
21  
22  
23  
24  
25  
26  
27  
28  
29  
30  
31  
32  
33  
34  
35  
36  
37  
38  
39  
40  
41  
42  
43  
44  
45  
46  
47  
48  
49  
50  
51  
52  
53  
54  
55  
56  
57  
58  
59  
60

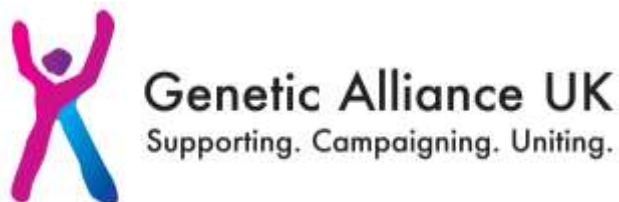

## Appendix I

## Donating biological samples for medical research

### Introduction

Medical research is necessary to improve our understanding of what keeps us healthy and how diseases start and progress. It also means scientists can develop new and improved treatments.

Body fluid (such as blood, saliva, urine) and human tissue (such as fat, cancer tumours or muscle) are often used in scientific and medical research. Types of research that need body fluid and human tissue include:

- Looking at how the body works to fight disease.
- Testing new treatments for conditions such as heart disease and diabetes.
- Developing tests for different types of cancer.
- Researching how certain types of cells could be used to treat conditions like Parkinson's disease, Alzheimer's disease and multiple sclerosis.

Many of the tests and treatments used today resulted from people donating body fluid and human tissue (often called 'samples') for research years ago.

### How are human samples collected?

There are a number of ways that human samples can be collected:

- Samples may be left over after surgery. Tissue may be removed during surgery so tests can be done on the tissue or to stop the diseased tissue spreading to other parts of the body. After any necessary tests have been done on the tissue, there may be some left over. This left over tissue may be destroyed or used for medical research.
- Samples may be left over from a medical test such as a blood test.
- Samples might be donated specifically for medical research.
- A person may give permission (known as 'consent' or 'authorisation') for a sample to be taken and used for research in the event of their death.
- A person's family may give permission for the person's organs, which would have been donated for transplant, to be used for research if they are not suitable for transplant or a suitable recipient is not available.

The collection and use of samples is tightly governed by law in the UK. The removal of samples from a person is always done with the donor's permission, and any research first has to be approved by a research ethics committee. This committee is usually made up of doctors, scientist, patients and the general public, and ensures any research allowed to be done is for the benefit of patients. In specific circumstances the law allows samples that have already been collected to be used for another purpose, as long as the donor cannot be identified and the use has been approved by an ethics committee.

### What is done with the sample once it is collected?

Samples may be collected by a researcher and used immediately, or they may be collected for research purposes and kept. This may be in a researcher's laboratory or it may be in a storage place specifically for samples, known as a biobank.

The biobank keeps the samples so they can be used by scientists for research. In other words, biobanks are a little like libraries of samples, and only a research team can use them if they have the appropriate approval. A biobank has to follow regulations and have a licence, granted by the Human Tissue Authority (a UK Government organisation), to be able to store human tissue samples for research.

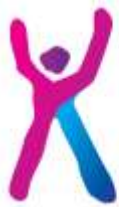

**Genetic Alliance UK**  
Supporting. Campaigning. Uniting.

These systems ensure that any research respects the privacy of the people who donated the samples and that the research is of benefit to society. In many cases, it can be very important to have a patient's medical records along with their sample so that scientists can make sense of the results of their research. Any identifying information, such as names or addresses, is removed and not included with the sample.

### **How long is the biological sample kept?**

A sample may be used all at once. However, it is often the case that it won't all be used in one go. Therefore the sample may be stored and used over many years so that research can be done on it well into the future.

### **What are the benefits from donating biological samples to medical research?**

The person donating the sample is unlikely to benefit directly from the research, as it can take many years for the research on samples to produce new treatments or cures for diseases. Nevertheless, donors often see a benefit from knowing that they have personally helped medical research.

## **Genetic Alliance UK 2012**

### **The following information was used during the making of this leaflet:**

"Donating samples for research; Patient information" – Central England Haemato-Oncology Research Biobank

"Donating your tissue for research"- Human Tissue Authority

"Active choice but not too active: Public perspectives on biobank consent models" Simon et al. 2011; Genetics in Medicine

## Appendix II

## Focus Group – Discussion Guide

**Introduction (5 minutes)**

*Thank them for coming*

*Aim of discussion – hear people’s views, there are no right or wrong opinions, disagreement OK*

*Participation voluntary*

*Confidentiality – all info anonymous, personal details will not be passed on to any third party*

*Get permission for recording to be taped – no names or identifying features used when typed up*

*Guidelines – talk one at a time; am interested in everyone’s views so will try and give everyone equal ‘airtime’; no wrong answers – be honest and open.*

*Turn mobile phones off*

*Go round room. Ask everyone to say their name and one of their favourite foods.*

**Research (30 minutes)**

On the information sheet you’ve been given, there is some general information about donating samples for research. Has everybody had a chance to read this information? (if not give participants a few minutes to read document). So, to summarise....*give a brief overview of information on the document.*

1. So to start off, does anyone have any questions about anything I’ve said so far?

So I’d like us to think now about the different types of samples someone might donate to medical research. Human biological samples can mean a variety of different things including body fluid such as blood, saliva and sperm, and human tissue such as fat, cancer tumours or muscle or even whole organs.

2. Do you think there are some types of samples which are more sensitive to give than others? Which ones? Why?

There are also various different ways that samples can be collected. They might be

- left over from routine procedures such as surgery;
- left over after a medical test such as a blood test;
- donated specifically for medical research, for example a cheek swab or an extra blood sample;
- donated after a person’s death;
- a person's organs e.g. heart or kidneys, which would have been donated for transplant, may be used for research if they are not suitable for transplant or a suitable recipient is not available. The relevant clinical data may also be included and reviewed after death.

3. I’d like us to go through each of these in turn and discuss whether you have concerns about any of these ways that samples might be collected and why. GO THROUGH AND PROBE EACH POINT SPECIFICALLY (AFTER GROUP DISCUSSION: ask participants to complete associated question on questionnaire)

4. Do you see donation of human samples for medical research and organ donation for transplant similarly or do you think they are different?

5. Thinking specifically about donating tissue or organs after one’s death, do you think if someone has indicated in writing that they are willing to donate these for research in the event of their death, their wishes can be overruled by their relatives?

Samples may be used for a variety of different types of research. This might include looking at how the body works to fight disease; testing new treatments for conditions such as heart disease and diabetes or developing ways of diagnosing earlier different types of cancer.

6. Are there any types of research you would not be happy for your sample to be used for? Why?

(AFTER GROUP DISCUSSION: ask participants to complete associated question on questionnaire)

There are many places where research is performed, such as universities, NHS, charities such as cancer research, government labs and pharmaceutical companies. These are all groups that do research & sometimes they collaborate with each other in order to make medical progress.

7. Do you have any concerns about any particular types of organisations using donated samples. Which if any, and why?

(AFTER GROUP DISCUSSION: ask participants to complete associated question on questionnaire)

8. What do you think about the organisations that conduct research on samples? Do you think they are generally doing a good thing for society? Do you have any concerns about what they do?

9. Institutions such as the government and ethics review committees make decisions about what research can and can't be done on human samples. Ethics review committees are usually made up of different experts such as of doctors, scientists, ethics experts and patients Do you generally trust these types of institutions to make decisions about what research can and can't be done using human tissue samples?

### Consent (40 minutes)

I'd like to now talk about getting permission, also known as consent, to use a person's sample for medical research. Most of us have probably had blood taken at some point and some of us will have had an operation. If we have blood taken for a test, there might be some blood left over after the test has been done. Similarly, tissue may be removed during an operation and there may be some left over after any necessary tests have been done on the tissue. So you would not have any additional tissue taken just for research purposes unless you had specifically given permission for this at the time it was going to be taken. In most cases, it is just the leftover blood or tissue that you might agree to donate to medical research.

10. Thinking about leftover blood or tissue being used for medical research, do you think a person needs to be asked for their consent? FOR EACH RESPONSE: Why/why not? How important is this to you?

11. What would you expect to happen to samples that are left over from clinical procedures?

12. The majority of the time, tissue that is left over is destroyed. How do you feel about that?

There are a number of different ways that a person could give their permission or consent for their sample to be used for medical research. I'd like us to think about some of these now and discuss what we like and what we dislike about these different types of consent.

For peer review only - <http://bmjopen.bmj.com/site/about/guidelines.xhtml>

I'd like us to start by thinking about whether we prefer what is known as an **opt-in** system, or whether we prefer an **opt-out** system of sample donation.

Opt-in means that a person has to say that, after they turn 18, they are willing to and actively agree to donate their sample for research. This is how the current system for organ donation works in the UK.

The other approach is an opt-out approach. In this system, it is assumed that a person is happy, after they turn 18, for their sample to be used for research unless they specifically say otherwise. However, there is a mechanism in place for a person who is not willing to donate to opt out.

So, to start with, let's think about the first option, OPT-IN.

13. What do you think are the pros and cons about this approach? Why?

14. Thinking now about the OPT-OUT approach, what do you think are the pros and cons? Why?

15. Which do you prefer? How important is this to you? (AFTER GROUP DISCUSSION: ask participants to complete associated question on questionnaire)

The current system is an opt-in one, so I want us to think about this type of consent now. If you were going to be asked to donate any leftover blood or tissue for medical research there are two ways this could be done. You could be asked to give consent **every time** you have an operation or blood test, or you could give consent just **once for life for all your samples**, with the option of withdrawing at a later point if you wanted to.

16. Thinking about **consent every time**, what do you think are the advantages and disadvantages of this approach?

17. Thinking about **consent once for life**, what do you think are the advantages and disadvantages of this approach?

18. Can you think of any happy medium which might be better?

19. Which would you prefer? Why? How important is this to you? (AFTER GROUP DISCUSSION: ask participants to complete associated question on questionnaire)

20. If people gave consent just once, when and where do you think the best place would be to give consent?

21. If someone wanted to consent to donate their tissue or organs for medical research in the event of their death, do you think it should be obtained at the same time as consent for organ transplantation and recorded on the organ donor register?

In front of you, you have 3 different scenarios. In each one the story is essentially the same, however there are some slight differences and these are highlighted in bold. I'd like to discuss what you think of each of these in turn.

*Read all 3 scenarios out loud highlighting the key differences between the three. Then go back and discuss each one in turn.*

1  
2 Scenario 1: Lisa is having surgery to remove a lump from her breast which the doctor is  
3 concerned may be cancerous. Before the surgery the surgeon explains that once the tissue  
4 is removed, they will take it to the laboratory to do tests on it to check what it is. The  
5 surgeon then explains that after these tests are done, there may be some tissue left over.  
6 He asks Lisa if she would like to donate this left over tissue for medical research. If it is not  
7 donated for medical research it will be destroyed. The surgeon doesn't know exactly what  
8 kinds of research the tissue might be used for, but it may be used to find better ways to  
9 diagnose, prevent and treat cancer. He also explains that before any research is done, it has  
10 to be approved by an independent ethics committee.  
11

12  
13 So, in this scenario:

- 14 ● Lisa is asked to give consent once to donate the left over tissue for a range of future  
15 unknown uses
- 16 ● Lisa is given some general information about the kind of research the tissue might be  
17 used for but nothing specific.
- 18 ● This type of consent is known as GENERIC CONSENT

19  
20  
21 22. What do you think about this type of consent?

22  
23 23. What do you **like** about this approach?

24  
25 24. Do you have **any concerns** about this approach?  
26

27 **Scenario 2:** Lisa is having surgery to remove a lump from her breast which the doctor is  
28 concerned may be cancerous. Before the surgery the surgeon explains that once the tissue  
29 is removed, they will take it to the laboratory to do tests on it to check what it is. The  
30 surgeon then explains that after these tests are done, there may be some tissue left over.  
31 He asks Lisa if she would like to donate this left over tissue for medical research. If it is not  
32 donated for medical research it will be destroyed. The surgeon doesn't know exactly what  
33 types of research the tissue might be used for, but it may be used to find better ways to  
34 diagnose, prevent and treat cancer. Lisa is asked to sign a consent form. The surgeon  
35 explains that **Lisa can indicate on the consent form whether there are any particular**  
36 **kinds of research which she doesn't want the tissue to be used for, for example**  
37 **research involving animals or research conducted outside the UK.** He also explains  
38 that before any research is done, it has to be approved by an independent ethics  
39 committee.  
40

41  
42 So, in this scenario:

- 43 ● Lisa is asked to give consent once to donate the tissue for a range of future unknown  
44 uses;
- 45 ● Lisa is given some general information about the kind of research the tissue might be  
46 used for;
- 47 ● **Lisa can say if there are any particular kinds of research which she doesn't**  
48 **want the tissue to be used for.**
- 49 ● This type of consent is known as TIERED CONSENT

50  
51 25. What do you think about this type of consent?

52  
53 26. What do you **like** about this approach?

54  
55 27. Do you have any **concerns** about this approach?  
56

57 Scenario 3: Lisa is having surgery to remove a lump from her breast which the doctor is  
58 concerned may be cancerous. Before the surgery the surgeon explains that once the tissue  
59 is removed, they will take it to the laboratory to do tests on it to check what it is. The  
60 surgeon then explains that after these tests are done, there may be some tissue left over.  
He asks Lisa if she would like to donate this left over tissue for medical research. If it is not



1  
2 donated for medical research it will be destroyed. The surgeon explains that **the hospital**  
3 **are currently involved in a study looking at the growth of tumours. He informs her**  
4 **that if she gives permission for the left over tissue to be used, it would only be for**  
5 **this particular study.** He also explains that the study has been approved by an  
6 independent ethics committee.  
7

8 So, in this scenario:

- 9
- 10 • **Lisa is only asked to give consent to a particular study and is given**  
11 **information about that study.**
  - 12 • This type of consent is known as SPECIFIC CONSENT

13 28. What do you think about this type of consent?

14 29. What do you **like** about this approach?

15 30. Do you have any **concerns** about this approach?

16  
17  
18  
19  
20  
21 31. In this exercise we have discussed three different types of consent. Which do you  
22 prefer and why? GO ROUND AND ASK PEOPLE (AFTER GROUP DISCUSSION: ask  
23 participants to complete associated question 6 & 7 on questionnaire)

24  
25 32. Generic consent is the most practical type of consent as it is the least costly to put in  
26 place. Researchers try their very best to honour donors' wishes, but in some cases  
27 where they cannot do this with confidence, instead of risking using a sample for  
28 something the donor feels strongly against, it won't be used at all. If your first choice  
29 wasn't generic consent, does this information change your preference? (AFTER  
30 GROUP DISCUSSION: ask participants to complete question 8.

31  
32 33. So, we've discussed which type of consent you would like for left over samples.  
33 Would your preference be any different for samples that you might donate  
34 specifically for research, e.g. if you volunteered to take part in a study and had to  
35 give a saliva or blood sample?

36  
37 34. Would your preference be any different if you were donating what you might  
38 consider to be more sensitive samples e.g. genetic data, stem cells?

39  
40 35. If you decide to withdraw consent would you be happy for researchers to use the  
41 data that had already been generated up to that point using your sample?

42  
43 36. Do you think a central website where you can find out about general research that  
44 your sample might be used for would be useful and something you would use?  
45  
46

### 47 **Information (10 minutes)**

48  
49  
50 Researchers often need to have access to the donor's medical records in order to be able to  
51 meaningfully interpret the results of the scientific research. However, information, such as  
52 names or addresses are always removed and not included with the sample. This is so that  
53 the person who donated the sample cannot be identified by the scientist conducting the  
54 research or anyone analysing the results of the research. However, the sample may have a  
55 code so that someone not involved in the research can identify the individual if necessary.  
56

57 37. Would you be happy with your medical records being linked to your sample or would  
58 you have concerns? Why?  
59  
60

1  
2 38. Are there any types of information you would not want to be associated with your  
3 sample?  
4

5 Sometimes it can also be helpful for the researcher to have certain information about the  
6 lifestyle of the person who donated the sample, for example whether they smoked, drank  
7 alcohol, how often they exercised etc. This information might help them to better  
8 understand the particular condition they are investigating.  
9

10 39. Would you be happy for this information to be made available or would you have  
11 concerns about your lifestyle information being associated with your sample? Why?  
12  
13

#### 14 **Ownership of sample (5 minutes)** 15

16 40. What significance do you attach to a biological sample once it has been removed  
17 from your body? Do you still see it as yours or part of you in some way? Are you  
18 owed money if a drug is developed using your sample?  
19  
20  
21  
22  
23  
24  
25  
26  
27  
28  
29  
30  
31  
32  
33  
34  
35  
36  
37  
38  
39  
40  
41  
42  
43  
44  
45  
46  
47  
48  
49  
50  
51  
52  
53  
54  
55  
56  
57  
58  
59  
60

### Appendix III

Survey looking at the publics' views on donating biological samples for medical research

*This survey was originally conducted online in September 2012 and hosted by the market research company Research Now.*

Q1. What age are you?

1. 18-24
2. 25-34
3. 35-44
4. 45-54
5. 55-64
6. 65+

Q2. Are you male or female?

1. Male
2. Female

Q3. What is the occupation of person who receives the highest income in your household?

1. Higher managerial/ professional/ administrative (e.g. established doctor, solicitor, board director in a large organisation (200+ employees, top level civil servant/public service employee)) **(A – Letters will be hidden)**
2. Intermediate managerial/ professional/ administrative (e.g. newly qualified (under 3 years) doctor, solicitor, board director small organisation, middle manager in large organisation, principle officer in civil service/local government) **(B)**
3. Supervisory or clerical level/ junior managerial/ professional/ administrative (e.g. office worker, student doctor, foreman with 25+ employees, salesperson, etc) **(C1)**
4. Student **(C1)**
5. Skilled manual worker (e.g. skilled bricklayer, carpenter, plumber, painter, bus/ ambulance driver, HGV driver, AA patrolman, pub/bar worker, etc) **(C2)**
6. Semi or unskilled manual work (e.g. manual workers, all apprentices to be skilled trades, caretaker, park keeper, non-HGV driver, shop assistant) **(D)**
7. Casual worker – not in permanent employment **(E)**
8. Housewife/househusband/ homemaker **(E)**
9. Retired and living on state pension **(E)**
10. Unemployed or not working due to long-term sickness **(E)**
11. Full-time carer of other household member **(E)**
98. Other (specify)

Q4. What region do you live in?

- 1
- 2
- 3
- 4
- 5 1. Channel Islands
- 6 2. East of England
- 7 3. East Midlands
- 8 4. London
- 9 5. North East
- 10 6. North West
- 11 7. Northern Ireland
- 12 8. Scotland
- 13 9. South East
- 14 10. South West
- 15 11. Wales
- 16 12. West Midlands
- 17 13. Yorkshire / Humberside
- 18 96. Not on Map
- 19
- 20
- 21
- 22
- 23
- 24

25 Q5. Please choose one option that best describes your ethnic group or background.

- 26
- 27
- 28 1. White or White British
- 29 2. Mixed race
- 30 3. Asian or Asian British (not Chinese)
- 31 4. Black or Black British
- 32 5. Chinese
- 33 6. Other ethnic group
- 34 96. Prefer not to say
- 35
- 36
- 37

38 Q6. Which religion do you most identify with?

- 39
- 40
- 41 1. Christianity
- 42 2. Islam
- 43 3. Hinduism
- 44 4. Sikhism
- 45 5. Judaism
- 46 6. Buddhism
- 47 7. Other religion
- 48 8. No religion
- 49 96. Prefer not to say
- 50
- 51
- 52
- 53

54 Q7. If you do have a religion you identify with, to what extent do you consider yourself religious?

- 55
- 56
- 57 1. Not at all religious
- 58 2. Moderately religious
- 59 3. Very religious
- 60 96. Prefer not to say

1  
2  
3  
4  
5 Q8. Please indicate which, if any, is the highest educational or professional qualification you  
6 have obtained.  
7

- 8 1. No formal qualification
- 9 2. GCSE, O level, Scottish Standard Grade or equivalent
- 10 3. GCE, A-level, Scottish Higher or similar
- 11 4. Vocational (BTEC/NVQ/Diploma)
- 12 5. Degree level or above
- 13 96. Prefer not to say

14  
15  
16  
17  
18 Q9. How would you describe your own level of knowledge about the medical research process  
19 including the use of human tissue samples?  
20

- 21 1. No knowledge
- 22 2. Some knowledge
- 23 3. Good knowledge

24  
25  
26  
27 Q10. Are you or have you ever been affected by a long-standing illness, disability or infirmity  
28 which has required continuous or frequent medical attention (e.g. cancer, diabetes, heart disease,  
29 asthma, a genetic condition)?  
30

- 31 1. Yes
- 32 2. No

33  
34  
35  
36 Q11. Has a close family member ever been affected by a long-standing illness, disability or  
37 infirmity which has required continuous or frequent medical attention (e.g. cancer, diabetes, heart  
38 disease, asthma, a genetic condition)?  
39

- 40 1. Yes
- 41 2. No

42  
43  
44  
45 Q12. Have you ever had blood or tissue removed during a medical or surgical procedure?  
46

- 47 1. Yes
- 48 2. No
- 49 97. Don't know

50  
51  
52  
53 Q13. Have you ever been asked to donate any blood or tissue for medical research?  
54

- 55 1. Yes
- 56 2. No
- 57 97. Don't know

58  
59  
60  
**ASK IF CODED 1 AT Q13.**

1  
2  
3 Q14. Did you agree to donate?  
4  
5

- 6 1. Yes  
7 2. No  
8  
9 97. Don't know

10  
11 **ASK IF CODED 2 AT Q14.**

12 Q14a. Please tell us a little bit about your reasons for choosing not to donate.

13 *There are no right or wrong answers – we're just interested in your honest opinion.*  
14  
15

16 This survey is being done to help us understand public opinion about human tissue samples donated  
17 by people for medical research.  
18

19  
20 Medical research is essential to improve our understanding of what keeps us healthy and how  
21 diseases start and progress. It also means scientists can develop new and improved treatments.  
22 Body fluid such as blood, saliva and urine, and human tissue such as cells, skin, fat or even whole  
23 organs (in the event of someone's death), are often used in scientific and medical research. Usually  
24 these are referred to as samples.  
25  
26

27  
28 Types of research that need samples include:  
29  
30

- 31 • Looking at how the body works to fight disease.  
32 • Looking at why some people are more likely to develop certain diseases.  
33 • Developing tests to diagnose conditions like cancer or dementia earlier on.  
34 • Testing new treatments for conditions such as heart disease and diabetes.  
35 • Researching how certain types of cells could be used to treat conditions like Parkinson's  
36 disease and Alzheimer's disease.  
37  
38

39  
40 Many of the tests and treatments used today resulted from people donating samples for research  
41 previously. The removal of samples from a person is always done with the donor's permission.  
42 Samples that are donated for research are anonymised so that the researcher using the sample does  
43 not know who it came from. The types of research that are allowed to take place are highly  
44 regulated by both UK law and also by independent research ethics committees (usually made up of  
45 doctors, scientist, patients and the general public). These ensure any research allowed to be done is  
46 for the benefit of patients.  
47  
48

49  
50 *The next button will appear shortly. In the meantime take some time to read the information above  
51 as it relates to the remainder of the survey.*  
52  
53

54  
55 Q15. On a scale of 1 to 5 with 1 being Not At All Important and 5 being Extremely Important, how  
56 important do you think it is for people to donate samples for medical research?  
57

58 **SCALE:**

- 59 1. Not at all important  
60 2.

- 3.
- 4.
5. Extremely important
97. Don't know

Q16. Samples can be left over from surgery or a medical procedure, or they can be donated specifically for research. Left over samples that are not required for clinical diagnosis or donated for medical research are often destroyed.

In general, would you like to be asked to donate samples for medical research?

1. Definitely yes
2. Probably yes
3. Probably not
4. Definitely not
97. Don't know

#### RANDOMISE STATEMENTS

Q17. You are having a medical procedure to treat a health issue. Would you donate the following types of samples for medical research if they were left over (after necessary medical tests had been done) following the procedure?

#### SCALE:

1. Definitely yes
2. Probably yes
3. Probably not
4. Definitely not
97. Don't know

#### STATEMENTS:

1. Blood
2. Skin tissue
3. Fat
4. Cancerous tissue
5. Liver tissue
6. Bone or cartilage
7. Spare eggs not fertilised during IVF treatment (IVF is a process by which an egg is fertilised by a sperm outside the body and then transferred back into the body to establish a successful pregnancy) **ASK ONLY FEMALES**
8. Spare embryos (fertilised eggs) not transferred back into the body following IVF (IVF is a process by which an egg is fertilised by a sperm outside the body and then transferred back into the body to establish a successful pregnancy)

#### RANDOMISE STATEMENTS

1  
2  
3 Q18. You've gone to the hospital for an appointment and whilst you are in the waiting room the  
4 receptionist explains they are collecting samples for medical research. Would you agree to donate  
5 the following types of samples specifically for medical research, i.e. not as part of any medical  
6 procedure, put purely for the purposes of research?  
7  
8

9  
10 Would you agree to donate the following types of samples specifically for medical research?  
11 Below are some definitions you might need to know in order to answer the questions.  
12

13  
14 *Local anaesthetic - "A type of painkilling medication that is used to numb areas of the body during*  
15 *surgical procedures. You stay awake when you have a local anaesthetic"*  
16

17  
18 *General anaesthetic - "A medication that causes loss of sensation. It is used to give pain relief during*  
19 *surgery. General anaesthetic makes you completely lose consciousness so that surgery can be carried*  
20 *out without causing any pain or discomfort. Most healthy people don't have any problems when*  
21 *having a general anaesthetic. However, as with most medical procedures, there is a small risk of*  
22 *long-term complications and, rarely, death."*  
23  
24

25  
26 **SCALE:**

- 27 1. Definitely yes
  - 28 2. Probably yes
  - 29 3. Probably not
  - 30 4. Definitely not
  - 31 97. Don't know
- 32  
33  
34  
35

36 **STATEMENTS:**

- 37 1. Saliva
  - 38 2. Urine
  - 39 3. Blood
  - 40 4. Tissue collected requiring a local anaesthetic (e.g. a skin cell scraping)
  - 41 5. Tissue collected requiring a general anaesthetic (e.g. a liver sample)
  - 42 6. Sperm **ASK ONLY MALES**
- 43  
44  
45  
46  
47

48 Q19. In the event of your death, would you be willing to donate the following for medical  
49 research?  
50

51 **SCALE:**

- 52 1. Definitely yes
  - 53 2. Probably yes
  - 54 3. Probably not
  - 55 4. Definitely not
  - 56 97. Don't know
- 57  
58  
59  
60

**STATEMENTS:**



1. A small sample of the liver
2. A small sample of the brain
3. A whole liver
4. A whole brain

Q20. You are having surgery for a health issue which requires a general anaesthetic. The surgeon asks you whether you would be willing to consent to any additional tissue (i.e. tissue not needing to be removed as part of the health issue) being taken during the surgery for medical research. He assures you that any additional tissue taken would have no impact for you or your health and that no extra tissue would be removed without your consent.

A decision to consent or not to consent would be equally respected and would have no impact on the care you receive.

Would you be willing to donate the following types of samples for medical research?

*General anaesthetic - "A medication that causes loss of sensation. It is used to give pain relief during surgery. General anaesthetic makes you completely lose consciousness so that surgery can be carried out without causing any pain or discomfort. Most healthy people don't have any problems when having a general anaesthetic. However, as with most medical procedures, there is a small risk of long-term complications and, rarely, death."*

#### SCALE:

1. Definitely yes
2. Probably yes
3. Probably not
4. Definitely not
97. Don't know

#### STATEMENTS:

1. Samples taken from the same part of the body being operated on
2. Samples taken from an area close by
3. Samples involving an additional procedure e.g. taking bone marrow or a tissue sample whilst under the same general anaesthetic

#### RANDOMISE STATEMENTS

Q21. Samples may be used for lots of different types of research. The types of research that are allowed to take place are highly regulated by both UK law and also by research ethics committees. Would you be willing to donate samples for the following types of research?

*Research ethics committee - "A committee usually made up of doctors, scientist, patients and the general public. These ensure any research allowed to be done is for the benefit of patients."*

**SCALE:**

1. Definitely yes
2. Probably yes
3. Probably not
4. Definitely not
97. Don't know

**STATEMENTS:**

1. Understanding how our body fights disease
2. Understanding how our genetic makeup influences whether or not we will be affected by certain conditions
3. Testing new treatments
4. Research which involves using cells that come from embryos (*fertilised eggs*)
5. Research involving animals
6. Research conducted outside of the UK

**RANDOMISE ORDER OF STATEMENTS.**

Q22. There are many places where research is performed, such as universities, the NHS, medical research charities such as Cancer Research UK and Arthritis Research UK, pharmaceutical companies and diagnostic companies. These organisations work individually, and often in collaboration, to carry out research, to understand disease, develop tests for diseases and develop and test new treatments.

Would you be willing to donate samples to the following organisations to carry out approved medical research?

*Diagnostic companies - "A company which develops and manufactures medical tests to diagnose diseases"*

**SCALE:**

1. Definitely yes
2. Probably yes
3. Probably not
4. Definitely not
97. Don't know

**STATEMENTS**

1. NHS hospitals
2. Universities
3. Medical research charities
4. Pharmaceutical companies
5. Diagnostic companies

1  
2  
3  
4  
5 Q23. Samples left over following surgery and once any necessary tests have been done, can be  
6 anonymised and used for medical research. On a scale of 1 to 5 with 1 being Not At All Important  
7 and 5 being Extremely Important, how important do you think it is that you are first asked for your  
8 permission (often known as 'consent') for any left over samples to be used for medical research?  
9 *Anonymised - i.e. identifying features such as names and addresses are removed*  
10  
11

12  
13 **SCALE:**

- 14 1. Not at all important  
15 2.  
16 3.  
17 4.  
18 5. Extremely important  
19  
20  
21  
22

23 Q24. There are a number of different ways that a person could give consent for their left over  
24 samples to be used for medical research.  
25  
26

- 27 a) One way is an 'opt-in' system. Opt-in means that a person must specifically be asked for  
28 their permission before any leftover samples can be used in medical research.  
29  
30  
31 b) The other way is an 'opt-out' system. In this system, it is assumed that a person is happy,  
32 after they turn 18 years old, for any leftover samples to be used for medical research unless they  
33 specifically say otherwise.  
34  
35

36 Which of the two systems to donating leftover samples do you prefer?  
37  
38

- 39 1. Opt-in  
40 2. Opt-out  
41 3. No preference  
42 97. Don't know  
43  
44  
45  
46

47 Q25. The current system in the UK is an opt-in system. That means you have to say whether you  
48 want any leftover samples to be donated for medical research. If you were going to be asked to  
49 donate any leftover samples for medical research there are three ways this could be done.  
50  
51

- 52 a) You could be asked to give consent for left over samples to be used for research **every time**  
53 you have samples removed, or  
54  
55  
56 b) you could be asked just **once for life** for any future left over samples to be used for medical  
57 research (with the option of withdrawing your permission at any later point if you wanted to),  
58  
59  
60 c) you could be **asked at certain points** during your life, for example every 10 years by your GP,  
or at the start of treatment for a particular condition or health issue.

1  
2  
3 Which of these three approaches do you prefer?  
4  
5

- 6 1. Consent every time
- 7 2. Consent once for life
- 8 3. Consent at certain points
- 9 4. No preference
- 10 97. Don't know
- 11
- 12
- 13
- 14

15 Q26. If you were going to be asked to donate left over samples for medical research every time  
16 you had a medical procedure, would you rather this was discussed with you by a health  
17 professional before the medical procedure or afterwards?  
18

- 19 1. Before
- 20 2. After
- 21 3. No preference
- 22 97. Don't know
- 23
- 24
- 25
- 26
- 27

28 Q27. If we adopted a consent once for life system in the UK for adults (i.e. aged 18 years and  
29 over), when would you prefer to be asked about consenting left over samples for medical  
30 research? *Choose up to 3 options.*  
31

- 32 1. When registering at a GP surgery
- 33 2. During a routine GP appointment
- 34 3. When applying for a driving license
- 35 4. When applying for a passport
- 36 5. The first time I visit the hospital
- 37 6. The first time I have a medical procedure (e.g. blood test or surgery)
- 38 98. Other (please specify)
- 39
- 40
- 41
- 42
- 43
- 44

45 Q28. What would be your preferred way to register your consent to donate left over samples for  
46 medical research?  
47

- 48 1. Face to face with a health professional
- 49 2. Letter
- 50 3. Email
- 51 4. Telephone
- 52 5. Via a website
- 53 6. Completing a form (from a GP surgery, post office, library or other community centre) and  
54 returning it by post
- 55 98. Other (please specify)
- 56 97. Don't know
- 57
- 58
- 59
- 60

1  
2  
3  
4  
5 Q29. If you later decided you didn't want your samples to be used for medical research, what  
6 would be your preferred way to withdraw that consent?  
7

- 8
- 9 1. Face to face with a health professional
  - 10 2. Letter
  - 11 3. Email
  - 12 4. Telephone
  - 13 5. Via a website
  - 14 6. Completing a form (from a GP surgery, post office, library or other community centre) and  
15 returning it by post
  - 16 98. Other (please specify)
  - 17 97. Don't know
- 18  
19  
20  
21  
22

23 Q30. Imagine you have agreed to donate a sample for medical research. There are a number of  
24 ways you can give consent for that particular sample to be used:  
25

#### 26 STATEMENTS

- 27
- 28 1. You can give consent once for your sample to be used in any future research that has been  
29 approved by a research ethics committee. This type of consent is called Generic Consent.  
30

31  
32  
33 Thinking about Generic Consent, if this was the type of consent you were asked to give, how  
34 likely would you be to donate samples for medical research?  
35

36  
37  
38 *Research ethics committee. "A committee usually made up of doctors, scientist, patients and  
39 the general public. These ensure any research allowed to be done is for the benefit of  
40 patients."*  
41

- 42  
43  
44 2. You can give consent once for your sample to be used in any future research that has been  
45 approved by a research ethics committee but with the option of saying whether there are  
46 certain types of research you don't want your sample to be used for. This type of consent is  
47 called Tiered Consent.  
48

49  
50  
51 Thinking about Tiered Consent, if this was the type of consent you were asked to give, how  
52 likely would you be to donate samples for medical research?  
53

54  
55  
56 *Research ethics committee. "A committee usually made up of doctors, scientist, patients and  
57 the general public. These ensure any research allowed to be done is for the benefit of  
58 patients."*  
59  
60

- 1  
2  
3  
4  
5  
6  
7  
8  
9
3. You can give consent once for the sample to be used for a specific study that you have been told about, which has been approved by a research ethics committee. The sample will not be used for any other research other than the particular study you have given consent for. Any leftover tissue at the end of the study may be destroyed. This type of consent is called Specific Consent – once only.

10  
11  
12  
13  
14

Thinking about Specific Consent – once only, if this was the type of consent you were asked to give, how likely would you be to donate samples for medical research?

15  
16  
17  
18  
19

*Research ethics committee. "A committee usually made up of doctors, scientist, patients and the general public. These ensure any research allowed to be done is for the benefit of patients."*

- 20  
21  
22  
23  
24  
25  
26  
27
4. **Lastly**, you can give consent every time for the sample to be used for a specific study that you have been told about, which has been approved by a research ethics committee. With this type of consent you would then be contacted and asked for your consent for every new study in which your sample might be used. This type of consent is called Consent for every new study.

28  
29  
30  
31  
32

Thinking about Consent for every new study if this was the type of consent you were asked to give, how likely would you be to donate samples for medical research?

33  
34  
35  
36

*Research ethics committee. "A committee usually made up of doctors, scientist, patients and the general public. These ensure any research allowed to be done is for the benefit of patients."*

37  
38

**SCALE:**

- 39  
40  
41  
42  
43  
44  
45
1. Definitely yes
  2. Probably yes
  3. Probably not
  4. Definitely not
  97. Don't know

46  
47  
48  
49  
50  
51  
52

Q31. Which of these four types of consent do you prefer? Please rank them in order of preference. Put 1 for your first preference; 2 for your second; 3 for your third preference and 4 for your last preference. If you don't have any preference, and like all 4 equally, tick the 'No preference' you don't know then tick 'Don't know'

- 53  
54  
55  
56  
57  
58  
59  
60
1. Generic consent
  2. Tiered consent
  3. Specific consent – once only
  4. Consent for every new study
  5. No preference
  97. Don't know

**ASK TO THOSE PEOPLE WHO DID NOT RANK GENERIC CONSENT AS FIRST CHOICE**

Q32. Generic consent is the most practical type of consent as it is the least costly to put in place. Researchers try their very best to honour donors' wishes, but in some cases where it is too costly to put Tiered or Specific Consent in place, instead of risking using a sample for something the donor feels strongly against, it won't be used at all. If Tiered or Specific consent was not available, what would you do?

1. I would agree to give generic consent
2. I would rather my sample was not used at all
97. Don't know

Q33. Some people feel there are certain types of samples that are more sensitive to donate, for example sperm or left over eggs. If there was a sample that you considered to be sensitive, but were still willing to donate for medical research, which of the four types of consent would you prefer to give?

1. Generic consent
2. Tiered consent
3. Specific consent – once only
4. Consent for every new study
5. No preference
97. Don't know

Q34. Researchers often need to have access to the donor's medical records to be able to interpret the results of their scientific research. However, information such as names or addresses are always removed and are not included with the sample. This is so that the person who donated the sample cannot be identified by the scientist conducting the research or anyone analysing the results of the research. However, the sample may have a code so that someone not involved in the research can identify the individual if necessary, for example, if there was a serious health issue the donor should be aware of.

Would you be willing to have your anonymised medical records linked to your sample?

1. Definitely yes
2. Probably yes
3. Probably not
4. Definitely not
97. Don't know

Q35. Sometimes it can also be helpful for the researcher to have certain information about the lifestyle of the person who donated the sample, for example whether they smoke, drink alcohol, how often they exercise etc. This information might help them to better understand the particular

1  
2  
3 condition they are investigating. Would you be willing to have your anonymised lifestyle  
4 information linked to your sample?  
5  
6

- 7 1. Definitely yes
- 8 2. Probably yes
- 9 3. Probably not
- 10 4. Definitely not
- 11 97. Don't know
- 12
- 13
- 14
- 15

16  
17 Q36. For some people, it would be interesting to find out what type of medical research is going  
18 on. How would you like to get information on medical research including research on a particular  
19 condition that might use your sample?  
20

- 21
- 22 1. Website
- 23 2. Newsletter
- 24 3. Email
- 25 4. Letter
- 26 5. Would not be interested in additional information
- 27
- 28
- 29

30 Q37. If you were considering donating whole organs for medical research in the event of your  
31 death, are there any particular organs you would **not** feel comfortable donating?  
32 Please choose all that apply.  
33

- 34
- 35 1. Brain
- 36 2. Eyes
- 37 3. Heart
- 38 4. Kidneys
- 39 5. Liver
- 40 6. Lungs
- 41 7. I would not donate any of my organs for medical research
- 42 8. None of the above apply as I would be happy to donate either all my organs or whole body  
43 for research
- 44
- 45
- 46
- 47
- 48 98. Other organs I would not donate (please state)
- 49
- 50
- 51

52 Q38. Sometimes, organs donated for transplant can't be transplanted because for some reason  
53 they are not suitable. However, these organs can still be very useful to researchers. Would you be  
54 willing to donate organs you had intended for transplant for medical research instead if the organ  
55 was not suitable?  
56

- 57
- 58 1. Yes, I would donate an organ for research if it was not suitable for transplant
- 59 2. No, if they can't be used for transplant I would prefer they were not used at all
- 60 3. I would not agree to donate an organ for transplant



1  
2  
3 97. Don't know  
4  
5

6 Q39. If someone wanted to donate their tissue or organs for medical research in the event of  
7 their death, how do you think they should be able to provide their consent to do this?  
8  
9

- 10 1. It should be obtained at the same time as consent for organ transplantation and recorded on  
11 the organ donor register  
12 2. It should be discussed at a GP appointment and recorded in the patients' notes  
13 3. It should be discussed at a hospital and recorded in the patients' notes  
14 98. Other (please specify)  
15 97. Don't know  
16  
17  
18  
19

20 Q40. Someone has indicated in writing that they are willing to donate tissue or organs for medical  
21 research in the event of their death. After the donor's death the relatives decide they disagree with  
22 the donor's wishes. Do you think the relatives should be allowed to override the donor's wishes?  
23  
24  
25

- 26 1. Yes  
27 2. No  
28 97. Don't know  
29  
30  
31

32 Q41. If you have any particular views you would like to share with us about the topics raised in this  
33 questionnaire please feel free to write them here:  
34  
35  
36  
37  
38  
39  
40  
41  
42  
43  
44  
45  
46  
47  
48  
49  
50  
51  
52  
53  
54  
55  
56  
57  
58  
59  
60

## Appendix IV

## Results of survey –unweighted and weighted

| Demographic Data              |            |     |          |     |
|-------------------------------|------------|-----|----------|-----|
|                               | Unweighted |     | Weighted |     |
|                               | N          | %   | N        | %   |
| <b>Sex</b>                    |            |     |          |     |
| Male                          | 504        | 45% | 544      | 49% |
| Female                        | 606        | 55% | 566      | 51% |
| <b>Socioeconomic Group</b>    |            |     |          |     |
| A                             | 41         | 4%  | 44       | 4%  |
| B                             | 215        | 19% | 244      | 22% |
| C1                            | 311        | 28% | 322      | 29% |
| C2                            | 233        | 21% | 233      | 21% |
| D                             | 145        | 13% | 178      | 16% |
| E                             | 165        | 15% | 89       | 8%  |
| <b>Age</b>                    |            |     |          |     |
| 18-24                         | 135        | 12% | 133      | 12% |
| 25-34                         | 184        | 17% | 189      | 17% |
| 35-44                         | 198        | 18% | 200      | 18% |
| 45-54                         | 184        | 17% | 189      | 17% |
| 55-64                         | 176        | 16% | 167      | 15% |
| 65+                           | 233        | 21% | 233      | 21% |
| <b>Occupation</b>             |            |     |          |     |
| Higher managerial             | 41         | 4%  | 44       | 4%  |
| Intermediate managerial       | 215        | 19% | 244      | 22% |
| Supervisory or clerical level | 288        | 26% | 299      | 27% |
| Student                       | 23         | 2%  | 23       | 2%  |
| Skilled manual worker         | 233        | 21% | 233      | 21% |
| Semi or unskilled manual work | 145        | 13% | 178      | 16% |
| Casual worker                 | 12         | 1%  | 6        | 1%  |
| Housewife                     | 9          | 1%  | 5        | 0%  |
| Retired                       | 81         | 7%  | 45       | 4%  |
| Unemployed                    | 46         | 4%  | 24       | 2%  |
| Carer                         | 17         | 2%  | 9        | 1%  |
| Other                         | 0          | 0%  | 0        | 0%  |
| <b>Region</b>                 |            |     |          |     |
| Channel Islands               | 0          | 0%  | 0        | 0%  |
| East of England               | 92         | 8%  | 100      | 9%  |
| East Midlands                 | 57         | 5%  | 78       | 7%  |
| London                        | 213        | 19% | 144      | 13% |

## Appendix IV

## Results of survey –unweighted and weighted

|                                                           |      |     |      |     |
|-----------------------------------------------------------|------|-----|------|-----|
| North East                                                | 40   | 4%  | 44   | 4%  |
| North West                                                | 121  | 11% | 122  | 11% |
| Northern Ireland                                          | 30   | 3%  | 33   | 3%  |
| Scotland                                                  | 76   | 7%  | 89   | 8%  |
| South East                                                | 165  | 15% | 155  | 14% |
| South West                                                | 81   | 7%  | 89   | 8%  |
| Wales                                                     | 51   | 5%  | 55   | 5%  |
| West Midlands                                             | 94   | 8%  | 100  | 9%  |
| Yorkshire/Humberlands                                     | 90   | 8%  | 100  | 9%  |
| Not on map                                                | 0    | 0%  | 0    | 0%  |
| <b>Ethnicity</b>                                          |      |     |      |     |
| White or White British                                    | 1057 | 95% | 1065 | 96% |
| Mixed race                                                | 7    | 1%  | 8    | 1%  |
| Asian or Asian British (not Chinese)                      | 18   | 2%  | 17   | 1%  |
| Black or Black British                                    | 19   | 2%  | 12   | 1%  |
| Chinese                                                   | 2    | 0%  | 2    | 0%  |
| Other ethnic group                                        | 4    | 0%  | 2    | 0%  |
| Prefer not to say                                         | 3    | 0%  | 2    | 0%  |
| <b>Religion</b>                                           |      |     |      |     |
| Christianity                                              | 677  | 61% | 673  | 61% |
| Islam                                                     | 13   | 1%  | 11   | 1%  |
| Hinduism                                                  | 6    | 1%  | 6    | 1%  |
| Sikhism                                                   | 0    | 0%  | 0    | 0%  |
| Judaism                                                   | 6    | 1%  | 4    | 1%  |
| Buddhism                                                  | 11   | 1%  | 1    | 0%  |
| Other religion                                            | 15   | 1%  | 8    | 0%  |
| No religion                                               | 370  | 33% | 205  | 38% |
| Prefer not to say                                         | 12   | 1%  | 7    | 1%  |
| <b>To what extent do you consider yourself religious?</b> |      |     |      |     |
| Not at all religious                                      | 234  | 32% | 234  | 32% |
| Moderately religious                                      | 422  | 58% | 424  | 59% |
| Very religious                                            | 64   | 9%  | 56   | 8%  |
| Prefer not to say                                         | 8    | 1%  | 7    | 1%  |
| <b>Education</b>                                          |      |     |      |     |
| No formal qualification                                   | 70   | 6%  | 66   | 6%  |
| GCSE, O level, Scottish Standard Grade or equivalent      | 264  | 24% | 252  | 23% |
| GCE, A-level, Scottish Higher or similar                  | 214  | 19% | 214  | 19% |
| Vocational (BTEC/NVQ/Diploma)                             | 230  | 21% | 237  | 21% |

## Appendix IV

## Results of survey –unweighted and weighted

|                       |     |     |     |     |
|-----------------------|-----|-----|-----|-----|
| Degree level or above | 317 | 29% | 330 | 30% |
| Prefer not to say     | 15  | 1%  | 10  | 1%  |

**Q9 How would you describe your own level of knowledge about the medical research process including the use of human tissue samples?**

|                | Unweighted |      | Weighted |      |
|----------------|------------|------|----------|------|
|                | N          | %    | N        | %    |
| No knowledge   | 463        | 42%  | 466      | 42 % |
| Some knowledge | 603        | 54 % | 602      | 54 % |
| Good knowledge | 44         | 4 %  | 43       | 4 %  |

**Q10 Are you or have you ever been affected by a long-standing illness, disability or infirmity which has required continuous or frequent medical attention**

|     | Unweighted |      | Weighted |     |
|-----|------------|------|----------|-----|
|     | N          | %    | N        | %   |
| Yes | 399        | 36 % | 391      | 35% |
| No  | 711        | 64 % | 719      | 65% |

**Q11 Has a close family member ever been affected by a long-standing illness, disability or infirmity which has required continuous or frequent medical attention**

|     | Unweighted |      | Weighted |     |
|-----|------------|------|----------|-----|
|     | N          | %    | N        | %   |
| Yes | 767        | 69 % | 765      | 69% |
| No  | 343        | 31 % | 345      | 31% |

**Q12 Have you ever had blood or tissue removed during a medical or surgical procedure?**

|            | Unweighted |      | Weighted |     |
|------------|------------|------|----------|-----|
|            | N          | %    | N        | %   |
| Yes        | 446        | 40 % | 444      | 40% |
| No         | 553        | 50 % | 551      | 50% |
| Don't Know | 111        | 10 % | 115      | 10% |

**Q13 Have you ever been asked to donate any blood or tissue for medical research?**

|            | Unweighted |      | Weighted |     |
|------------|------------|------|----------|-----|
|            | N          | %    | N        | %   |
| Yes        | 182        | 16 % | 177      | 16% |
| No         | 904        | 81 % | 907      | 82% |
| Don't Know | 24         | 2 %  | 25       | 2%  |

Appendix IV

Results of survey –unweighted and weighted

| Q14 Did you agree to donate? |            |      |          |     |
|------------------------------|------------|------|----------|-----|
|                              | Unweighted |      | Weighted |     |
|                              | N          | %    | N        | %   |
| Yes                          | 155        | 85 % | 153      | 86% |
| No                           | 23         | 13 % | 21       | 12% |
| Don't Know                   | 4          | 2 %  | 3        | 2%  |

| Q15 On a scale of 1 to 5 with 1 being Not At All Important and 5 being Extremely Important, how important do you think it is for people to donate samples for medical research? |            |      |          |     |
|---------------------------------------------------------------------------------------------------------------------------------------------------------------------------------|------------|------|----------|-----|
|                                                                                                                                                                                 | Unweighted |      | Weighted |     |
|                                                                                                                                                                                 | N          | %    | N        | %   |
| 1 Not at all important                                                                                                                                                          | 5          | 0 %  | 4        | 0%  |
| 2                                                                                                                                                                               | 10         | 1 %  | 9        | 1%  |
| 3                                                                                                                                                                               | 78         | 7 %  | 76       | 7%  |
| 4                                                                                                                                                                               | 406        | 37 % | 408      | 37% |
| 5 Extremely important                                                                                                                                                           | 554        | 50 % | 567      | 51% |
| Don't know                                                                                                                                                                      | 57         | 5 %  | 46       | 4%  |

| Q16 In general, would you like to be asked to donate samples for medical research? |            |      |          |     |
|------------------------------------------------------------------------------------|------------|------|----------|-----|
|                                                                                    | Unweighted |      | Weighted |     |
|                                                                                    | N          | %    | N        | %   |
| Definitely yes                                                                     | 317        | 29 % | 327      | 29% |
| Probably yes                                                                       | 513        | 46 % | 526      | 47% |
| Probably not                                                                       | 157        | 14 % | 145      | 13% |
| Definitely not                                                                     | 42         | 4 %  | 35       | 3%  |
| Don't know                                                                         | 81         | 7 %  | 77       | 7%  |

| Q17 Would you donate the following types of samples for medical research if they were left over following the procedure? |   |            |          |          |         |            |          |          |          |         |            |
|--------------------------------------------------------------------------------------------------------------------------|---|------------|----------|----------|---------|------------|----------|----------|----------|---------|------------|
|                                                                                                                          |   | Unweighted |          |          |         |            | Weighted |          |          |         |            |
|                                                                                                                          |   | Def yes    | Prob yes | Prob not | Def not | Don't know | Def yes  | Prob yes | Prob not | Def not | Don't know |
| Blood                                                                                                                    | N | 587        | 433      | 48       | 23      | 19         | 599      | 425      | 48       | 20      | 8          |
|                                                                                                                          | % | 53%        | 39%      | 4%       | 2%      | 2%         | 54%      | 38%      | 4%       | 2%      | 2%         |
| Skin Tissue                                                                                                              | N | 520        | 451      | 72       | 32      | 35         | 533      | 451      | 67       | 28      | 32         |

## Appendix IV

## Results of survey –unweighted and weighted

|                                        |   |      |     |     |     |     |     |     |     |     |     |
|----------------------------------------|---|------|-----|-----|-----|-----|-----|-----|-----|-----|-----|
|                                        | % | 47%  | 41% | 6%  | 3%  | 3%  | 48% | 41% | 6%  | 3%  | 3%  |
| Fat                                    | N | 530  | 450 | 60  | 32  | 38  | 541 | 449 | 56  | 26  | 37  |
|                                        | % | 48 % | 41% | 5%  | 3%  | 3%  | 49% | 40% | 5%  | 2%  | 3%  |
| Cancerous Tissue                       | N | 572  | 425 | 52  | 26  | 35  | 586 | 420 | 49  | 22  | 34  |
|                                        | % | 52 % | 38% | 5%  | 2%  | 3%  | 53% | 38% | 4%  | 2%  | 3%  |
| Liver Tissue                           | N | 463  | 468 | 100 | 38  | 41  | 474 | 476 | 96  | 34  | 39  |
|                                        | % | 42 % | 42% | 9%  | 3%  | 4%  | 43% | 42% | 9%  | 3%  | 4%  |
| Bone or Cartilage                      | N | 472  | 460 | 90  | 46  | 42  | 482 | 460 | 87  | 41  | 40  |
|                                        | % | 43 % | 41% | 8%  | 4%  | 4%  | 43% | 41% | 8%  | 4%  | 4%  |
| Spare eggs not fertilised during IVF * | N | 133  | 159 | 121 | 104 | 89  | 128 | 149 | 111 | 93  | 86  |
|                                        | % | 22 % | 26% | 20% | 17% | 15% | 23% | 26% | 20% | 16% | 15% |
| Spare embryos                          | N | 225  | 245 | 217 | 223 | 200 | 230 | 254 | 210 | 213 | 203 |
|                                        | % | 20 % | 22% | 20% | 20% | 18% | 21% | 23% | 19% | 19% | 18% |

\*Female Only

**Q18 Would you agree to donate the following samples specifically for medical research?**

|                                                |   | Unweighted |          |          |         |            | Weighted |          |          |         |            |
|------------------------------------------------|---|------------|----------|----------|---------|------------|----------|----------|----------|---------|------------|
|                                                |   | Def yes    | Prob yes | Prob not | Def not | Don't know | Def yes  | Prob yes | Prob not | Def not | Don't know |
| Saliva                                         | N | 568        | 423      | 54       | 30      | 35         | 581      | 413      | 55       | 27      | 34         |
|                                                | % | 51 %       | 38%      | 5%       | 3%      | 3%         | 52%      | 37%      | 5%       | 2%      | 3%         |
| Urine                                          | N | 553        | 432      | 61       | 33      | 31         | 566      | 424      | 60       | 30      | 30         |
|                                                | % | 50 %       | 39%      | 5%       | 3%      | 3%         | 51%      | 38%      | 5%       | 3%      | 3%         |
| Blood                                          | N | 455        | 448      | 118      | 47      | 42         | 496      | 446      | 107      | 46      | 42         |
|                                                | % | 41 %       | 40%      | 11%      | 4%      | 4%         | 42%      | 40%      | 10%      | 4%      | 4%         |
| Tissue collected requiring a local anaesthetic | N | 273        | 463      | 197      | 100     | 77         | 283      | 471      | 190      | 88      | 78         |
|                                                | % | 25 %       | 42%      | 18%      | 9%      | 7%         | 26%      | 42%      | 17%      | 8%      | 7%         |
| Tissue collected                               | N | 166        | 286      | 310      | 235     | 113        | 172      | 300      | 309      | 214     | 115        |

Appendix IV

Results of survey –unweighted and weighted

|                                 |   |      |     |     |     |     |     |     |     |     |     |
|---------------------------------|---|------|-----|-----|-----|-----|-----|-----|-----|-----|-----|
| requiring a general anaesthetic | % | 15 % | 26% | 28% | 21% | 10% | 16% | 27% | 28% | 19% | 10% |
| Sperm *                         | N | 120  | 171 | 104 | 66  | 43  | 135 | 188 | 111 | 64  | 46  |
|                                 | % | 24 % | 34% | 21% | 13% | 9%  | 25% | 35% | 20% | 12% | 9%  |

\*Men only

**Q19 In the event of your death, would you be willing to donate the following samples for medical research?**

|                              |   | Unweighted |          |          |         |            | Weighted |          |          |         |            |
|------------------------------|---|------------|----------|----------|---------|------------|----------|----------|----------|---------|------------|
|                              |   | Def yes    | Prob yes | Prob not | Def not | Don't know | Def yes  | Prob yes | Prob not | Def not | Don't know |
| A small sample of your liver | N | 485        | 390      | 88       | 51      | 96         | 491      | 391      | 84       | 48      | 96         |
|                              | % | 44 %       | 35%      | 8%       | 5%      | 9%         | 44%      | 35%      | 8%       | 4%      | 9%         |
| A small sample of your brain | N | 429        | 304      | 166      | 96      | 115        | 438      | 305      | 158      | 94      | 116        |
|                              | % | 39 %       | 27%      | 15%      | 9%      | 10%        | 39%      | 27%      | 14%      | 8%      | 10%        |
| A whole liver                | N | 430        | 319      | 158      | 87      | 116        | 438      | 316      | 154      | 84      | 118        |
|                              | % | 39 %       | 29%      | 14%      | 8%      | 10%        | 39%      | 28%      | 14%      | 8%      | 11%        |
| A whole brain                | N | 353        | 234      | 221      | 150     | 152        | 360      | 236      | 214      | 145     | 155        |
|                              | % | 32 %       | 21%      | 20%      | 14%     | 14%        | 32%      | 21%      | 19%      | 13%     | 14%        |

**Q20 You are having surgery for a health issue which requires a general anaesthetic. The surgeon asks you whether you would be willing to consent to any additional tissue?**

|                                           |   | Unweighted |          |          |         |            | Weighted |          |          |         |            |
|-------------------------------------------|---|------------|----------|----------|---------|------------|----------|----------|----------|---------|------------|
|                                           |   | Def yes    | Prob yes | Prob not | Def not | Don't know | Def yes  | Prob yes | Prob not | Def not | Don't know |
| From the same part of the body            | N | 328        | 530      | 115      | 51      | 86         | 342      | 523      | 112      | 50      | 83         |
|                                           | % | 30 %       | 48%      | 10%      | 5%      | 8%         | 31%      | 47%      | 10%      | 5%      | 7%         |
| Samples taken from an area close by       | N | 219        | 481      | 212      | 89      | 109        | 229      | 490      | 206      | 81      | 104        |
|                                           | % | 20 %       | 43%      | 19%      | 8%      | 10%        | 21%      | 44%      | 19%      | 7%      | 9%         |
| Samples involving an additional procedure | N | 154        | 336      | 298      | 204     | 118        | 164      | 348      | 301      | 180     | 118        |
|                                           | % | 14 %       | 30%      | 27%      | 18%     | 11%        | 15%      | 31%      | 27%      | 16%     | 11%        |

**Q21 You are having surgery for a health issue which requires a general anaesthetic. The surgeon asks you whether you would be willing to consent to any additional tissue?**

|  |  | Unweighted |          |          |         |            | Weighted |          |          |         |            |
|--|--|------------|----------|----------|---------|------------|----------|----------|----------|---------|------------|
|  |  | Def yes    | Prob yes | Prob not | Def not | Don't know | Def yes  | Prob yes | Prob not | Def not | Don't know |

## Appendix IV

## Results of survey –unweighted and weighted

|                                           |   |      |     |     |     |     |     |     |     |     |     |
|-------------------------------------------|---|------|-----|-----|-----|-----|-----|-----|-----|-----|-----|
| Understanding how our body fights disease | N | 390  | 558 | 72  | 27  | 63  | 399 | 554 | 71  | 24  | 62  |
|                                           | % | 35 % | 50% | 6%  | 2%  | 6%  | 36% | 50% | 6%  | 2%  | 6%  |
| Understanding how our genetic makeup...   | N | 305  | 558 | 115 | 47  | 85  | 312 | 564 | 107 | 43  | 83  |
|                                           | % | 27 % | 50% | 10% | 4%  | 8%  | 28% | 51% | 10% | 4%  | 8%  |
| Research that is testing new treatments   | N | 318  | 511 | 132 | 52  | 97  | 325 | 502 | 133 | 50  | 99  |
|                                           | % | 29 % | 46% | 12% | 5%  | 9%  | 29% | 45% | 12% | 5%  | 9%  |
| Research involving cells from embryos     | N | 157  | 304 | 228 | 214 | 207 | 167 | 319 | 225 | 199 | 200 |
|                                           | % | 14 % | 27% | 21% | 19% | 19% | 15% | 29% | 20% | 18% | 18% |
| Research involving animals                | N | 107  | 270 | 281 | 318 | 134 | 117 | 285 | 271 | 304 | 132 |
|                                           | % | 10%  | 24% | 25% | 29% | 12% | 11% | 26% | 24% | 27% | 12% |
| Research outside the UK                   | N | 109  | 273 | 350 | 199 | 179 | 115 | 277 | 349 | 199 | 170 |
|                                           | % | 10 % | 25% | 32% | 18% | 16% | 10% | 25% | 31% | 18% | 15% |

## Q22 Would you be willing to donate samples to be used by the following organisations?

|                            |   | Unweighted |          |          |         |            | Weighted |          |          |         |            |
|----------------------------|---|------------|----------|----------|---------|------------|----------|----------|----------|---------|------------|
|                            |   | Def yes    | Prob yes | Prob not | Def not | Don't know | Def yes  | Prob yes | Prob not | Def not | Don't know |
| NHS Hospitals              | N | 367        | 570      | 69       | 31      | 73         | 379      | 569      | 65       | 28      | 70         |
|                            | % | 33 %       | 51%      | 6%       | 3%      | 7%         | 34%      | 51%      | 6%       | 2%      | 6%         |
| Universities               | N | 243        | 515      | 185      | 56      | 111        | 255      | 519      | 173      | 54      | 108        |
|                            | % | 22 %       | 46%      | 17%      | 5%      | 10%        | 23%      | 47%      | 16%      | 5%      | 10%        |
| Medical Research Charities | N | 307        | 563      | 107      | 41      | 92         | 311      | 561      | 108      | 39      | 91         |
|                            | % | 28 %       | 51%      | 10%      | 4%      | 8%         | 28%      | 51%      | 10%      | 4%      | 8%         |
| Pharmaceutical Companies   | N | 138        | 487      | 233      | 93      | 159        | 139      | 490      | 227      | 95      | 161        |
|                            | % | 12 %       | 44%      | 21%      | 8%      | 14%        | 12%      | 44%      | 20%      | 9%      | 14%        |
| Diagnostic Companies       | N | 187        | 515      | 180      | 74      | 154        | 182      | 511      | 183      | 74      | 159        |
|                            | % | 17 %       | 46%      | 16%      | 7%      | 14%        | 16%      | 46%      | 17%      | 7%      | 14%        |

## Q23 How important do you think it is that you are first asked for your permission (often known as 'consent') for any leftover samples to be used for medical research?

|  | Unweighted | Weighted |
|--|------------|----------|
|--|------------|----------|



## Appendix IV

## Results of survey –unweighted and weighted

|                        | N   | %    | N   | %   |
|------------------------|-----|------|-----|-----|
| 1 Not at all important | 40  | 4 %  | 42  | 4%  |
| 2                      | 41  | 4 %  | 43  | 4%  |
| 3                      | 104 | 9 %  | 103 | 9%  |
| 4                      | 274 | 25 % | 268 | 24% |
| 5 Extremely important  | 615 | 55 % | 614 | 55% |
| Don't know             | 36  | 3 %  | 40  | 4%  |

**Q24 How important do you think it is that you are first asked for your permission (often known as 'consent') for any leftover samples to be used for medical research?**

|               | Unweighted |      | Weighted |     |
|---------------|------------|------|----------|-----|
|               | N          | %    | N        | %   |
| Opt-in        | 605        | 55 % | 598      | 54% |
| Opt-out       | 308        | 28 % | 321      | 29% |
| No preference | 151        | 14 % | 146      | 13% |
| Don't know    | 46         | 4 %  | 45       | 4%  |

**Q25 Which of these three approaches do you prefer?**

|                           | Unweighted |      | Weighted |     |
|---------------------------|------------|------|----------|-----|
|                           | N          | %    | N        | %   |
| Consent every time        | 472        | 43 % | 480      | 43% |
| Consent once for life     | 231        | 21 % | 237      | 21% |
| Consent at certain points | 301        | 27 % | 298      | 27% |
| No preference             | 82         | 7 %  | 72       | 7%  |
| Don't know                | 24         | 2 %  | 22       | 2%  |

**Q26 If you were going to be asked to donate left over samples for medical research every time you had a medical procedure, would you rather this was discussed with you by a health professional before the medical procedure or afterwards?**

|               | Unweighted |      | Weighted |     |
|---------------|------------|------|----------|-----|
|               | N          | %    | N        | %   |
| Before        | 897        | 81 % | 908      | 82% |
| After         | 48         | 4 %  | 48       | 4%  |
| No preference | 151        | 14 % | 142      | 13% |
| Don't know    | 14         | 1 %  | 12       | 1%  |

## Appendix IV

## Results of survey –unweighted and weighted

**Q27 If a consent once for life system was in place, when would you prefer to be asked about consenting left over samples for medical research?**

|                                           | Unweighted |      | Weighted |     |
|-------------------------------------------|------------|------|----------|-----|
|                                           | N          | %    | N        | %   |
| When registering at a GP surgery          | 425        | 39 % | 419      | 38% |
| During a routine GP appointment           | 386        | 35 % | 380      | 34% |
| When applying for a driving license       | 83         | 8 %  | 88       | 8%  |
| When applying for a passport              | 75         | 7 %  | 80       | 7%  |
| The first time I visit the hospital       | 233        | 21 % | 228      | 21% |
| The first time I have a medical procedure | 513        | 47 % | 510      | 46% |

**Q28 If a consent once for life system was in place, when would you prefer to be asked about consenting left over samples for medical research?**

|                                            | Unweighted |      | Weighted |     |
|--------------------------------------------|------------|------|----------|-----|
|                                            | N          | %    | N        | %   |
| Face to face with a health professional    | 720        | 65 % | 727      | 65% |
| Letter                                     | 66         | 6 %  | 64       | 6%  |
| Email                                      | 30         | 3 %  | 32       | 3%  |
| Telephone                                  | 14         | 1 %  | 13       | 1%  |
| Via a website                              | 60         | 5 %  | 61       | 6%  |
| Completing a form and returning it by post | 161        | 15 % | 160      | 14% |
| Other (please specify)                     | 4          | 0 %  | 4        | 0%  |
| Don't know                                 | 55         | 5 %  | 49       | 4%  |

**Q29 If you later decided you didn't want your samples to be used for medical research, what would be your preferred way to withdraw that consent?**

|                                            | Unweighted |      | Weighted |     |
|--------------------------------------------|------------|------|----------|-----|
|                                            | N          | %    | N        | %   |
| Face to face with a health professional    | 421        | 38 % | 424      | 38% |
| Letter                                     | 95         | 9 %  | 92       | 8%  |
| Email                                      | 89         | 8 %  | 93       | 8%  |
| Telephone                                  | 56         | 5 %  | 51       | 5%  |
| Via a website                              | 137        | 12 % | 144      | 13% |
| Completing a form and returning it by post | 243        | 22 % | 244      | 22% |
| Other (please specify)                     | 8          | 1 %  | 6        | 1%  |
| Don't know                                 | 61         | 5 %  | 55       | 5%  |

**Q30 How likely would you be to donate samples for medical research using the following models of consent?**

|         | N | Unweighted |          |          |         |            | Weighted |          |          |         |            |
|---------|---|------------|----------|----------|---------|------------|----------|----------|----------|---------|------------|
|         |   | Def yes    | Prob yes | Prob not | Def not | Don't know | Def yes  | Prob yes | Prob not | Def not | Don't know |
| Generic | N | 216        | 528      | 163      | 64      | 139        | 228      | 538      | 154      | 52      | 38         |

Appendix IV

Results of survey –unweighted and weighted

|                                      |   |      |     |     |    |     |     |     |     |    |     |
|--------------------------------------|---|------|-----|-----|----|-----|-----|-----|-----|----|-----|
|                                      | % | 19 % | 48% | 15% | 6% | 13% | 21% | 48% | 14% | 5% | 12% |
| Tiered                               | N | 242  | 549 | 125 | 55 | 139 | 244 | 560 | 124 | 49 | 133 |
|                                      | % | 22 % | 49% | 11% | 5% | 13% | 22% | 50% | 11% | 4% | 12% |
| Specific                             | N | 336  | 553 | 88  | 28 | 105 | 339 | 551 | 89  | 29 | 102 |
|                                      | % | 30 % | 50% | 8%  | 3% | 9%  | 31% | 50% | 8%  | 3% | 9%  |
| Specific consent for every new study | N | 293  | 560 | 110 | 27 | 120 | 300 | 560 | 109 | 26 | 115 |
|                                      | % | 26 % | 50% | 10% | 2% | 11% | 27% | 50% | 10% | 2% | 10% |

**Q31 Which of these four types of consent do you prefer?**

| Preferences           | Generic    |     |          |     |
|-----------------------|------------|-----|----------|-----|
|                       | Unweighted |     | Weighted |     |
|                       | N          | %   | N        | %   |
| 1 <sup>st</sup>       | 200        | 18% | 207      | 19% |
| 2 <sup>nd</sup>       | 159        | 14% | 163      | 15% |
| 3 <sup>rd</sup>       | 168        | 15% | 168      | 15% |
| 4 <sup>th</sup>       | 344        | 31% | 327      | 30% |
| Tiered                |            |     |          |     |
| 1 <sup>st</sup>       | 156        | 14% | 152      | 14% |
| 2 <sup>nd</sup>       | 246        | 22% | 252      | 23% |
| 3 <sup>rd</sup>       | 360        | 32% | 355      | 32% |
| 4 <sup>th</sup>       | 105        | 10% | 106      | 10% |
| Specific (once only)  |            |     |          |     |
| 1 <sup>st</sup>       | 198        | 18% | 183      | 17% |
| 2 <sup>nd</sup>       | 306        | 28% | 304      | 27% |
| 3 <sup>rd</sup>       | 202        | 18% | 209      | 19% |
| 4 <sup>th</sup>       | 161        | 15% | 169      | 15% |
| Specific (every time) |            |     |          |     |
| 1 <sup>st</sup>       | 341        | 31% | 323      | 29% |
| 2 <sup>nd</sup>       | 157        | 14% | 146      | 13% |
| 3 <sup>rd</sup>       | 138        | 12% | 133      | 12% |
| 4 <sup>th</sup>       | 258        | 23% | 263      | 24% |
| Don't Know            | 63         | 6%  | 62       | 6%  |
| No Preference         | 181        | 16% | 183      | 17% |

**Q32 If your preferred system of consent was not available, what would you do?**

|                                              | Unweighted |      | Weighted |     |
|----------------------------------------------|------------|------|----------|-----|
|                                              | N          | %    | N        | %   |
| I would agree to give generic consent        | 348        | 52 % | 350      | 53% |
| I would rather my sample was not used at all | 187        | 28 % | 172      | 26% |
| Don't know                                   | 133        | 20 % | 135      | 21% |

## Appendix IV

## Results of survey –unweighted and weighted

**Q33 If there was a sample that you considered to be sensitive, but were still willing to donate for medical research, which of the four types of consent would you prefer to give?**

|                              | Unweighted |      | Weighted |     |
|------------------------------|------------|------|----------|-----|
|                              | N          | %    | N        | %   |
| Generic Consent              | 131        | 12 % | 135      | 12% |
| Tiered Consent               | 105        | 9 %  | 101      | 9%  |
| Specific Consent – once only | 246        | 22 % | 228      | 21% |
| Consent for every new study  | 278        | 25 % | 288      | 26% |
| No Preference                | 206        | 19 % | 216      | 19% |
| Don't Know                   | 144        | 13 % | 142      | 13% |

**Q34 Would you be willing to have your anonymised medical records linked to your sample?**

|                | Unweighted |      | Weighted |     |
|----------------|------------|------|----------|-----|
|                | N          | %    | N        | %   |
| Definitely yes | 266        | 24 % | 279      | 25% |
| Probably yes   | 493        | 44 % | 497      | 45% |
| Probably not   | 165        | 15 % | 157      | 14% |
| Definitely not | 77         | 7 %  | 71       | 6%  |
| Don't know     | 109        | 10 % | 107      | 10% |

**Q35 Would you be willing to have your anonymised lifestyle information linked to your sample?**

|                | Unweighted |      | Weighted |     |
|----------------|------------|------|----------|-----|
|                | N          | %    | N        | %   |
| Definitely yes | 377        | 34 % | 398      | 35% |
| Probably yes   | 530        | 48 % | 527      | 47% |
| Probably not   | 90         | 8 %  | 90       | 8%  |
| Definitely not | 48         | 4 %  | 43       | 4%  |
| Don't know     | 65         | 6 %  | 61       | 5%  |

**Q36 How would you like to get information on medical research including research on a particular condition that might use your sample?**

|                                                   | Unweighted |      | Weighted |     |
|---------------------------------------------------|------------|------|----------|-----|
|                                                   | N          | %    | N        | %   |
| Website                                           | 295        | 27 % | 304      | 27% |
| Newsletter                                        | 104        | 9 %  | 97       | 9%  |
| Email                                             | 302        | 27 % | 315      | 28% |
| Letter                                            | 241        | 22 % | 228      | 21% |
| Would not be interested in additional information | 168        | 15 % | 166      | 15% |

## Appendix IV

## Results of survey –unweighted and weighted

**Q37 Are there any particular organs you would not feel comfortable donating in the event of your death?**

|         | Unweighted |     | Weighted |     |
|---------|------------|-----|----------|-----|
|         | N          | %   | N        | %   |
| Brain   | 337        | 31% | 329      | 30% |
| Eyes    | 307        | 28% | 308      | 28% |
| Heart   | 128        | 12% | 121      | 11% |
| Kidneys | 60         | 5 % | 59       | 5%  |
| Liver   | 68         | 6 % | 65       | 6%  |
| Lungs   | 67         | 6%  | 63       | 6%  |

**Q38 If you were considering donating whole organs for medical research in the event of your death, are there any particular organs you would not feel comfortable donating?**

|                                                                                   | Unweighted |      | Weighted |     |
|-----------------------------------------------------------------------------------|------------|------|----------|-----|
|                                                                                   | N          | %    | N        | %   |
| Yes, I would donate an organ for research if it was not suitable for transplant   | 755        | 68 % | 766      | 69% |
| No, if they can't be used for transplant I would prefer they were not used at all | 125        | 11 % | 121      | 11% |
| I would not agree to donate an organ for transplant                               | 96         | 9 %  | 95       | 9%  |
| Don't know                                                                        | 134        | 12 % | 128      | 12% |

**Q39 Would you be willing to have your anonymised lifestyle information linked to your sample?)**

|                                                                                                                      | Unweighted |      | Weighted |     |
|----------------------------------------------------------------------------------------------------------------------|------------|------|----------|-----|
|                                                                                                                      | N          | %    | N        | %   |
| It should be obtained at the same time as consent for organ transplantation and recorded on the organ donor register | 580        | 52 % | 579      | 52% |
| It should be discussed at a GP appointment and recorded in the patients' notes                                       | 270        | 24 % | 267      | 24% |
| It should be discussed at a hospital and recorded in the patients' notes                                             | 140        | 13 % | 143      | 13% |
| Other                                                                                                                | 13         | 1 %  | 14       | 1%  |
| Don't know                                                                                                           | 107        | 10 % | 108      | 10% |

**Q40 Would you be willing to have your anonymised lifestyle information linked to your sample?)**

|            | Unweighted |      | Weighted |     |
|------------|------------|------|----------|-----|
|            | N          | %    | N        | %   |
| Yes        | 174        | 16 % | 166      | 15% |
| No         | 789        | 71 % | 800      | 72% |
| Don't know | 147        | 13 % | 144      | 13% |

Appendix IV

Results of survey –unweighted and weighted

Note: percentages may not add up to 100% due to rounding.

1  
2  
3  
4  
5  
6  
7  
8  
9  
10  
11  
12  
13  
14  
15  
16  
17  
18  
19  
20  
21  
22  
23  
24  
25  
26  
27  
28  
29  
30  
31  
32  
33  
34  
35  
36  
37  
38  
39  
40  
41  
42  
43  
44  
45  
46  
47  
48  
49  
50  
51  
52  
53  
54  
55  
56  
57  
58  
59  
60

For peer review only

Figure 1: Would you donate the following types of samples for medical research if they were left over (after any necessary medical tests had been done) following a medical procedure?

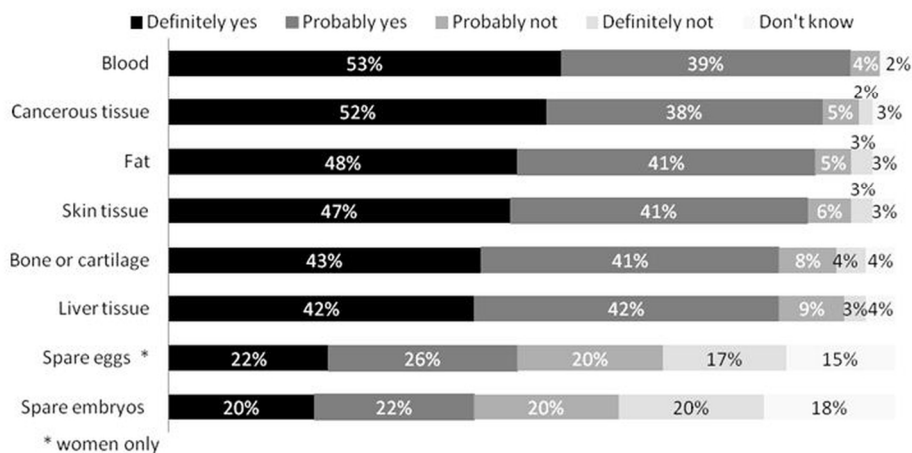

160x90mm (300 x 300 DPI)

review only

1  
2  
3  
4  
5  
6  
7  
8  
9  
10  
11  
12  
13  
14  
15  
16  
17  
18  
19  
20  
21  
22  
23  
24  
25  
26  
27  
28  
29  
30  
31  
32  
33  
34  
35  
36  
37  
38  
39  
40  
41  
42  
43  
44  
45  
46  
47  
48  
49  
50  
51  
52  
53  
54  
55  
56  
57  
58  
59  
60

Would you agree to donate the following types of samples specifically for medical research, i.e. not as part of any medical procedure, but purely for the purposes of research?

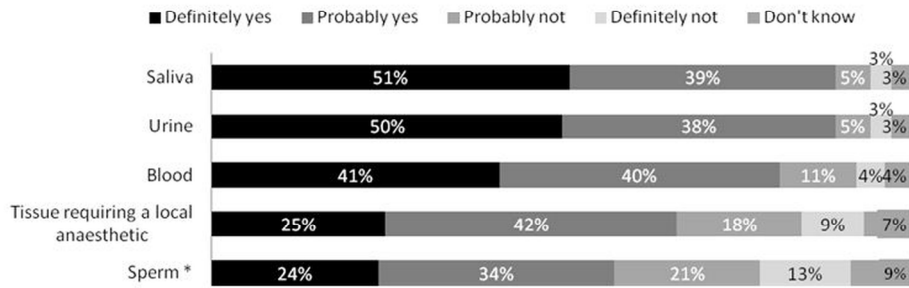

211x90mm (300 x 300 DPI)

Peer review only



Figure 3: Would you be willing to donate samples for the following type of samples for research?

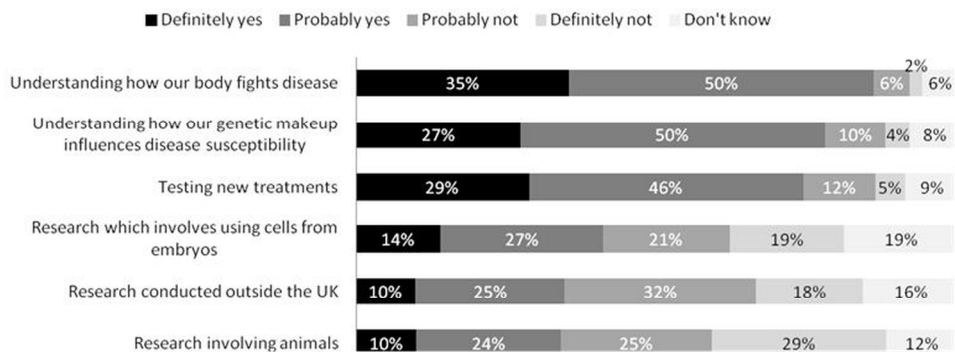

206x90mm (300 x 300 DPI)

Peer review only

1  
2  
3  
4  
5  
6  
7  
8  
9  
10  
11  
12  
13  
14  
15  
16  
17  
18  
19  
20  
21  
22  
23  
24  
25  
26  
27  
28  
29  
30  
31  
32  
33  
34  
35  
36  
37  
38  
39  
40  
41  
42  
43  
44  
45  
46  
47  
48  
49  
50  
51  
52  
53  
54  
55  
56  
57  
58  
59  
60

1  
2  
3  
4  
5  
6  
7  
8  
9  
10  
11  
12  
13  
14  
15  
16  
17  
18  
19  
20  
21  
22  
23  
24  
25  
26  
27  
28  
29  
30  
31  
32  
33  
34  
35  
36  
37  
38  
39  
40  
41  
42  
43  
44  
45  
46  
47  
48  
49  
50  
51  
52  
53  
54  
55  
56  
57  
58  
59  
60

Figure 4: Would you be willing to donate samples to the following organisations to carry out approved research?

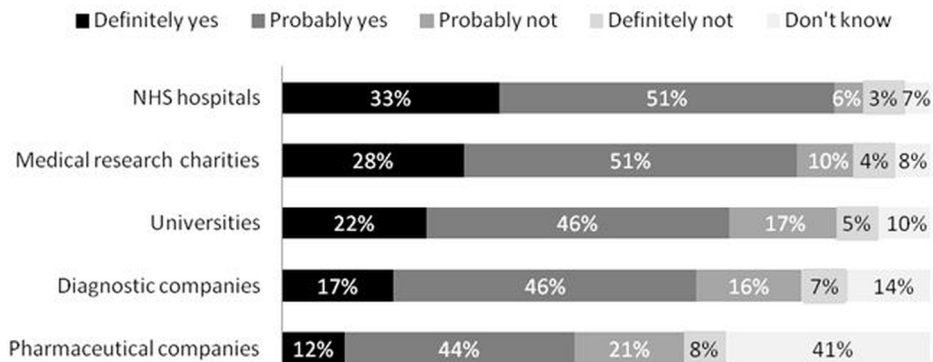

182x90mm (300 x 300 DPI)

er review only
